# Supplementary material for: Palladium( ii ) complexes bearing mesoionic carbene ligands: catalytic application in domino Sonogashira coupling/cyclization reactions for one-pot synthesis of benzofuran and indole derivatives
Source: Royal Society of Chemistry journal article supplement (doi:10.1039/d4ra03485f), 2024-01-01
Supplement: d4ra03485f1.pdf [file d4ra03485f1.pdf]

## Supporting Information

# **Palladium(II) Complexes bearing Mesoionic Carbene Ligands: Catalytic Application in Domino Sonogashira Coupling/Cyclization Reactions for One-pot Synthesis of Benzofuran and Indole Derivatives**

Om Prakash Joshi,<sup>a</sup> Ramalingam Thirumoorthi,<sup>a</sup> Ram T. Pardasani,<sup>a</sup> Sriparna Ray,<sup>b\*</sup> and  
Chandrakanta Dash<sup>\*a</sup>

<sup>a</sup>Department of Chemistry, School of Chemical Sciences and Pharmacy, Central University of Rajasthan, Bandarsindri, Ajmer-305817, Rajasthan, India.

<sup>b</sup>Catalytic Applications Laboratory, Department of Chemistry, School of Basic Sciences, Faculty of Science, Manipal University Jaipur, Dehmi Kalan, Jaipur – 303007, Rajasthan, India.

\*Corresponding author:

Email: [ckdash@curaj.ac.in](mailto:ckdash@curaj.ac.in); [sriparna.ray@gmail.com](mailto:sriparna.ray@gmail.com)

CD-OP-1-168

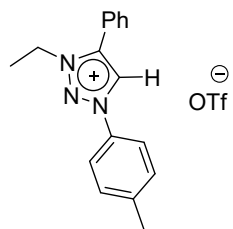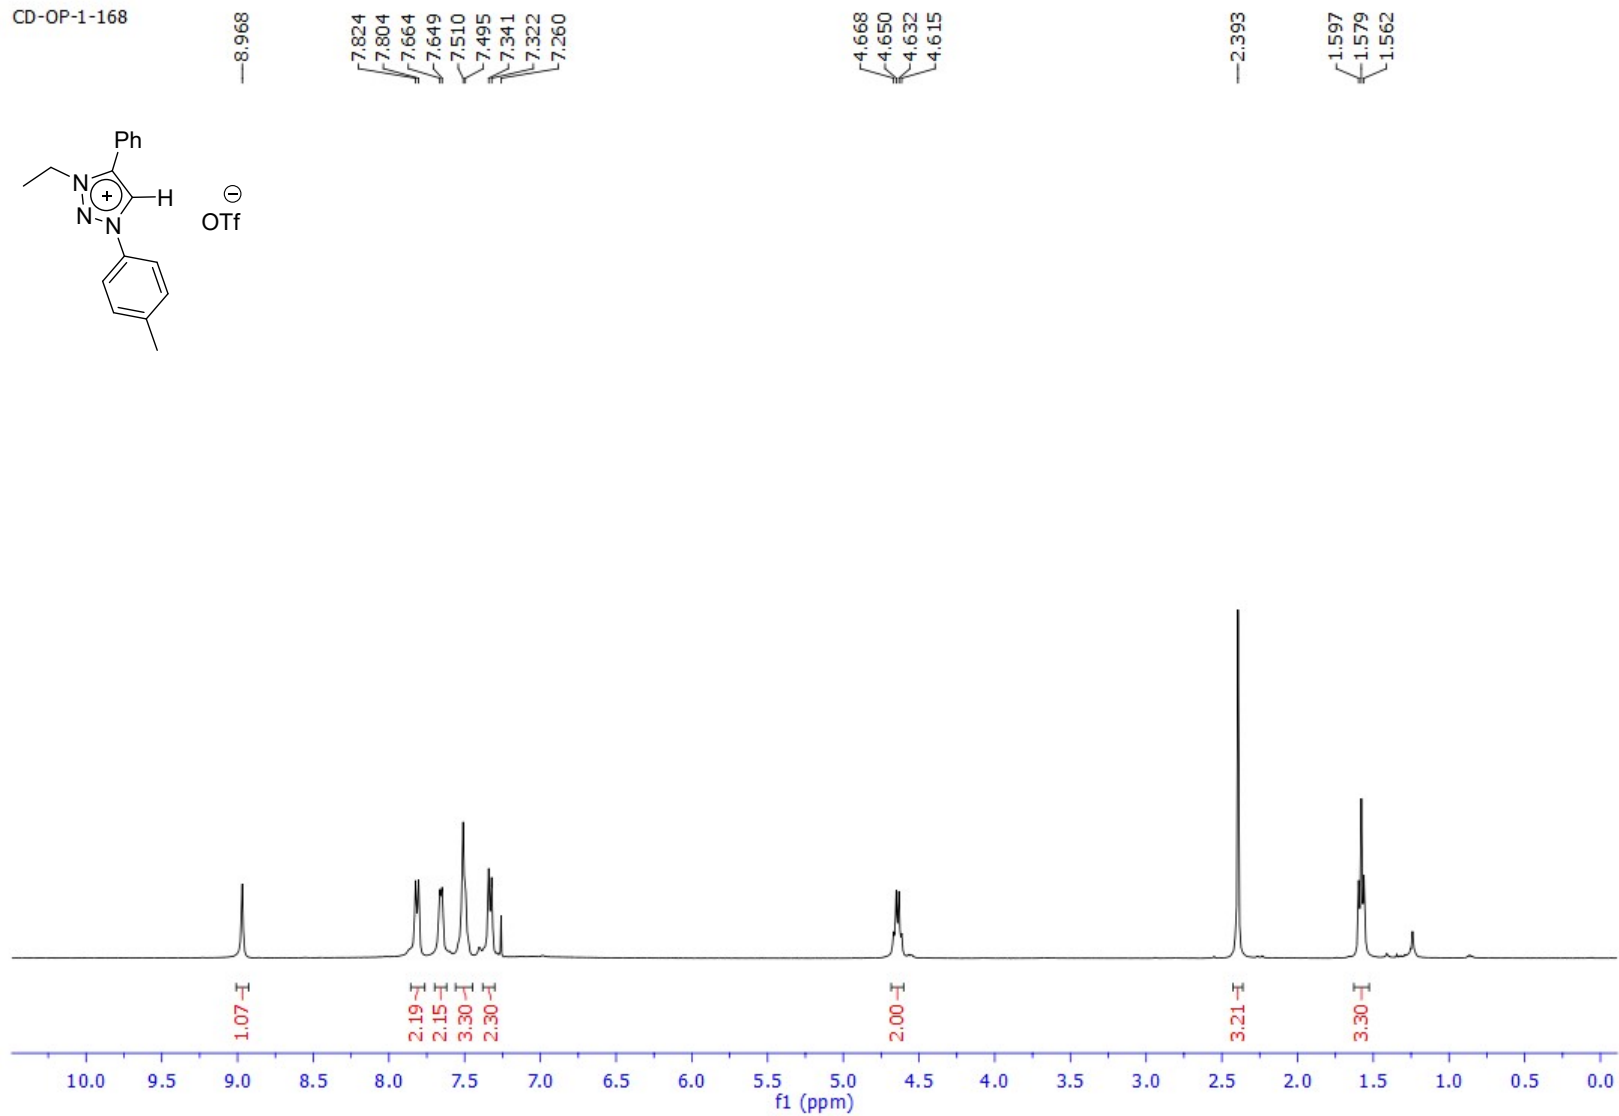

**Figure S1.**  $^1\text{H}$  NMR spectrum of **1a** in  $\text{CDCl}_3$

CD-OP-1-168

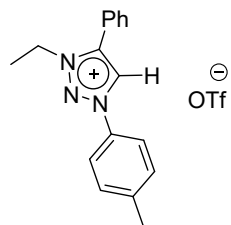

143.737  
142.579  
132.672  
131.900  
130.879  
129.721  
129.672  
126.559  
121.795  
121.480

77.478  
77.160  
76.841

47.990

21.369

14.139

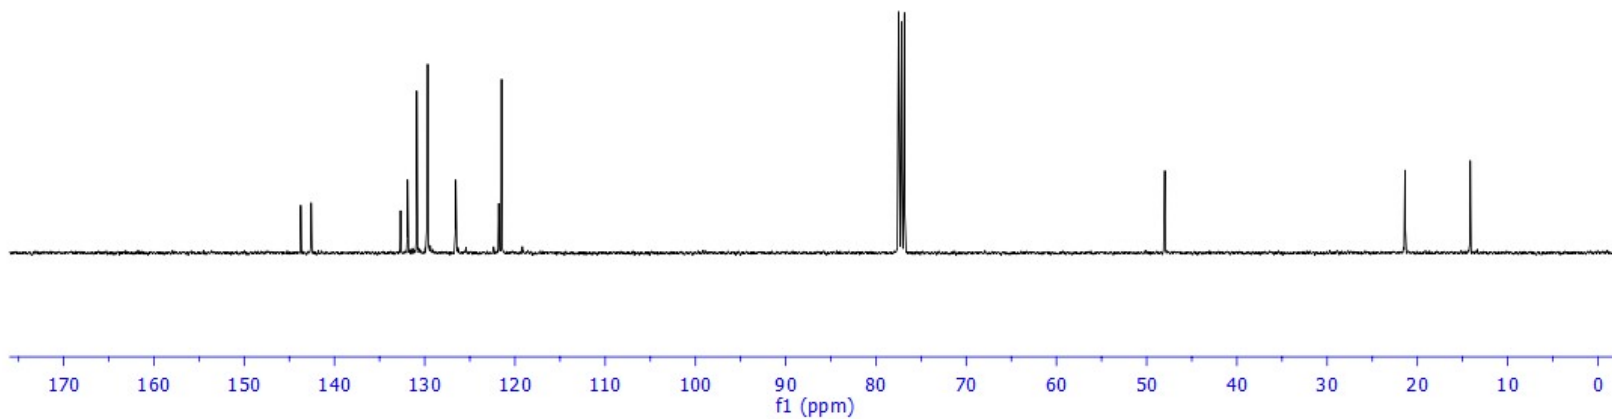

Figure S2.  $^{13}\text{C}\{^1\text{H}\}$  NMR spectrum of **1a** in  $\text{CDCl}_3$

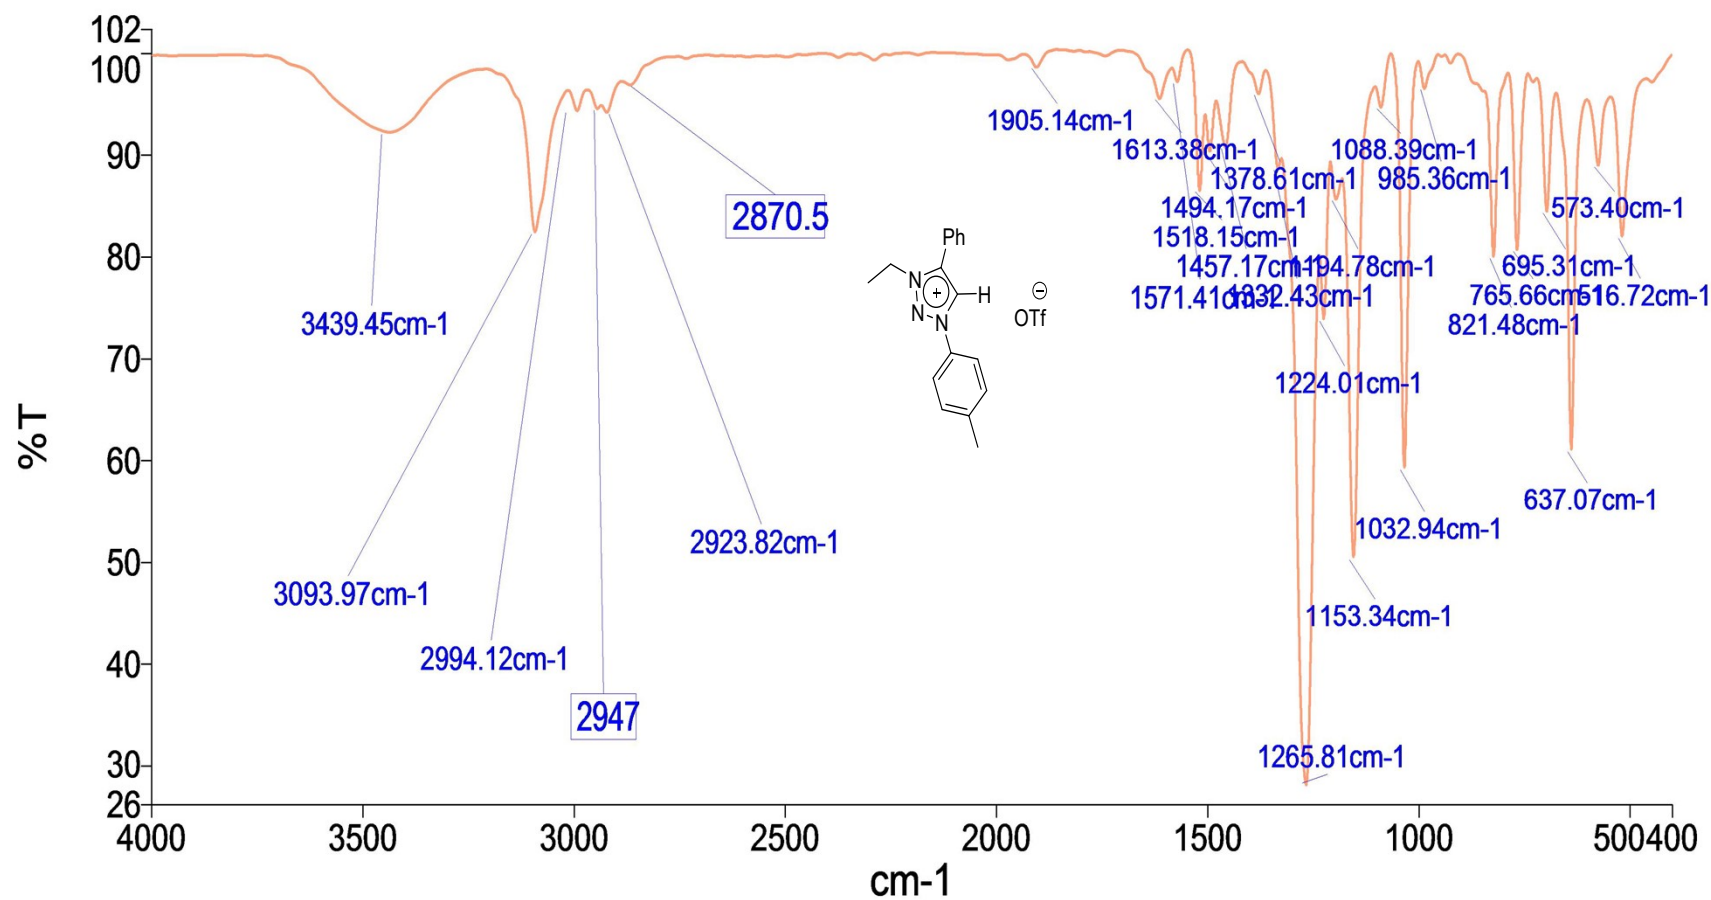

**Figure S3.** IR spectrum of **1a** in KBr



CD-OP-1-235-13C-14-07-2022

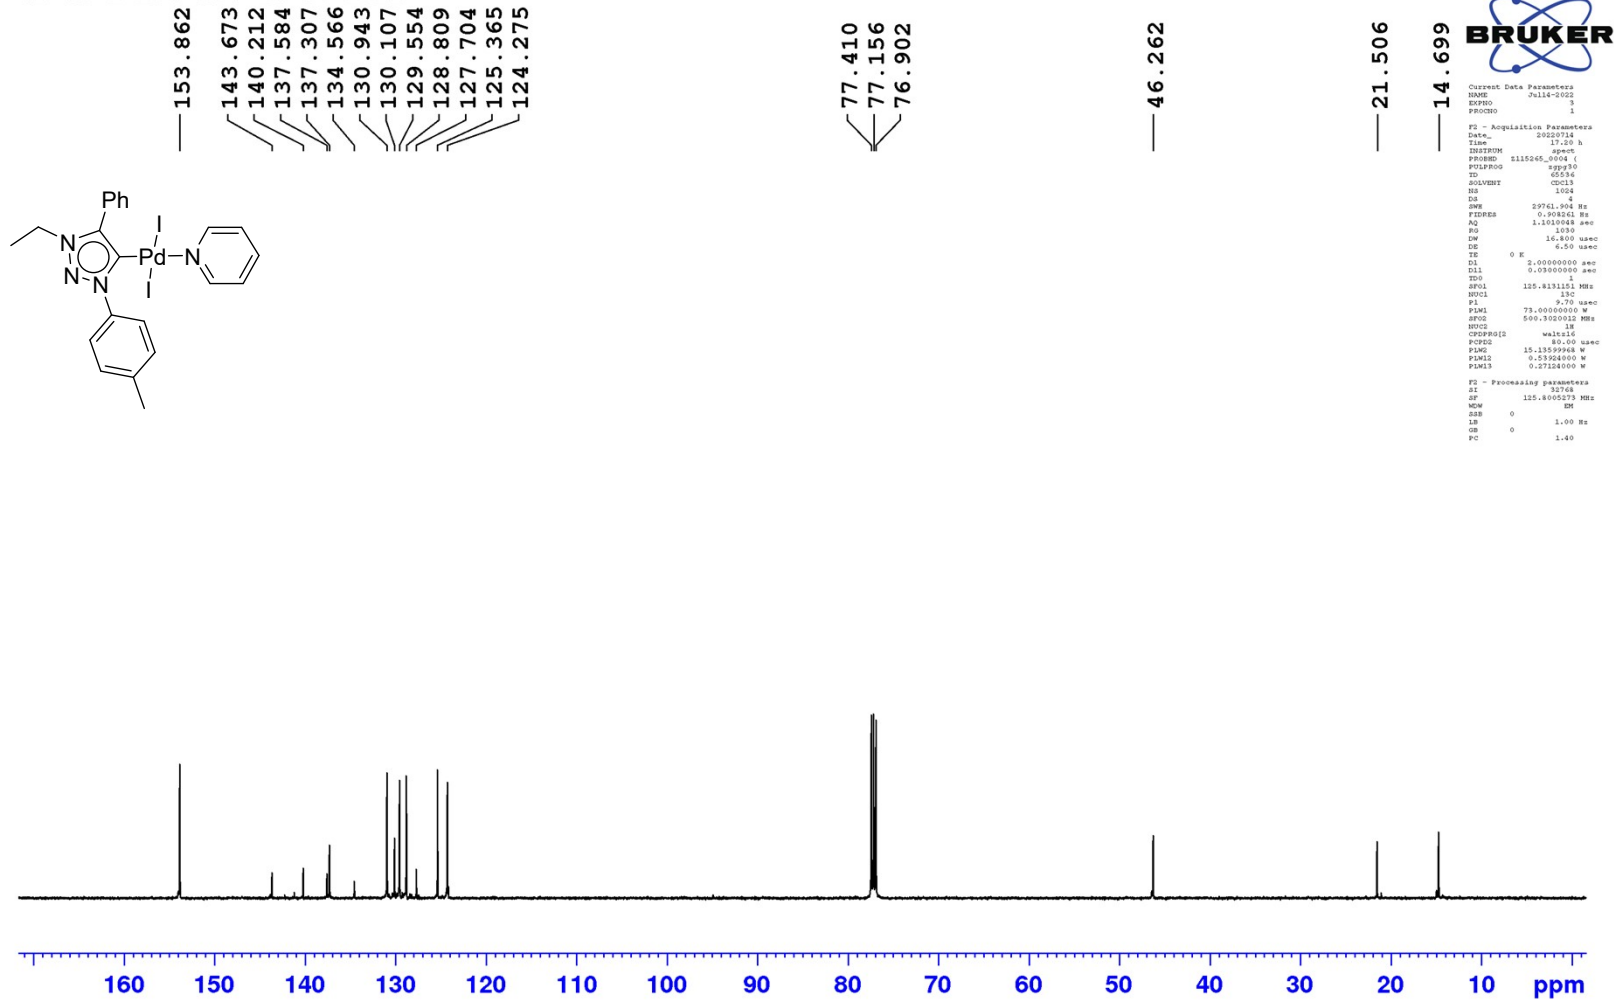

Figure S5.  $^{13}\text{C}\{^1\text{H}\}$  NMR spectrum of **2a** in  $\text{CDCl}_3$

CD-OP-1-235-DEPT-135-14.7.22

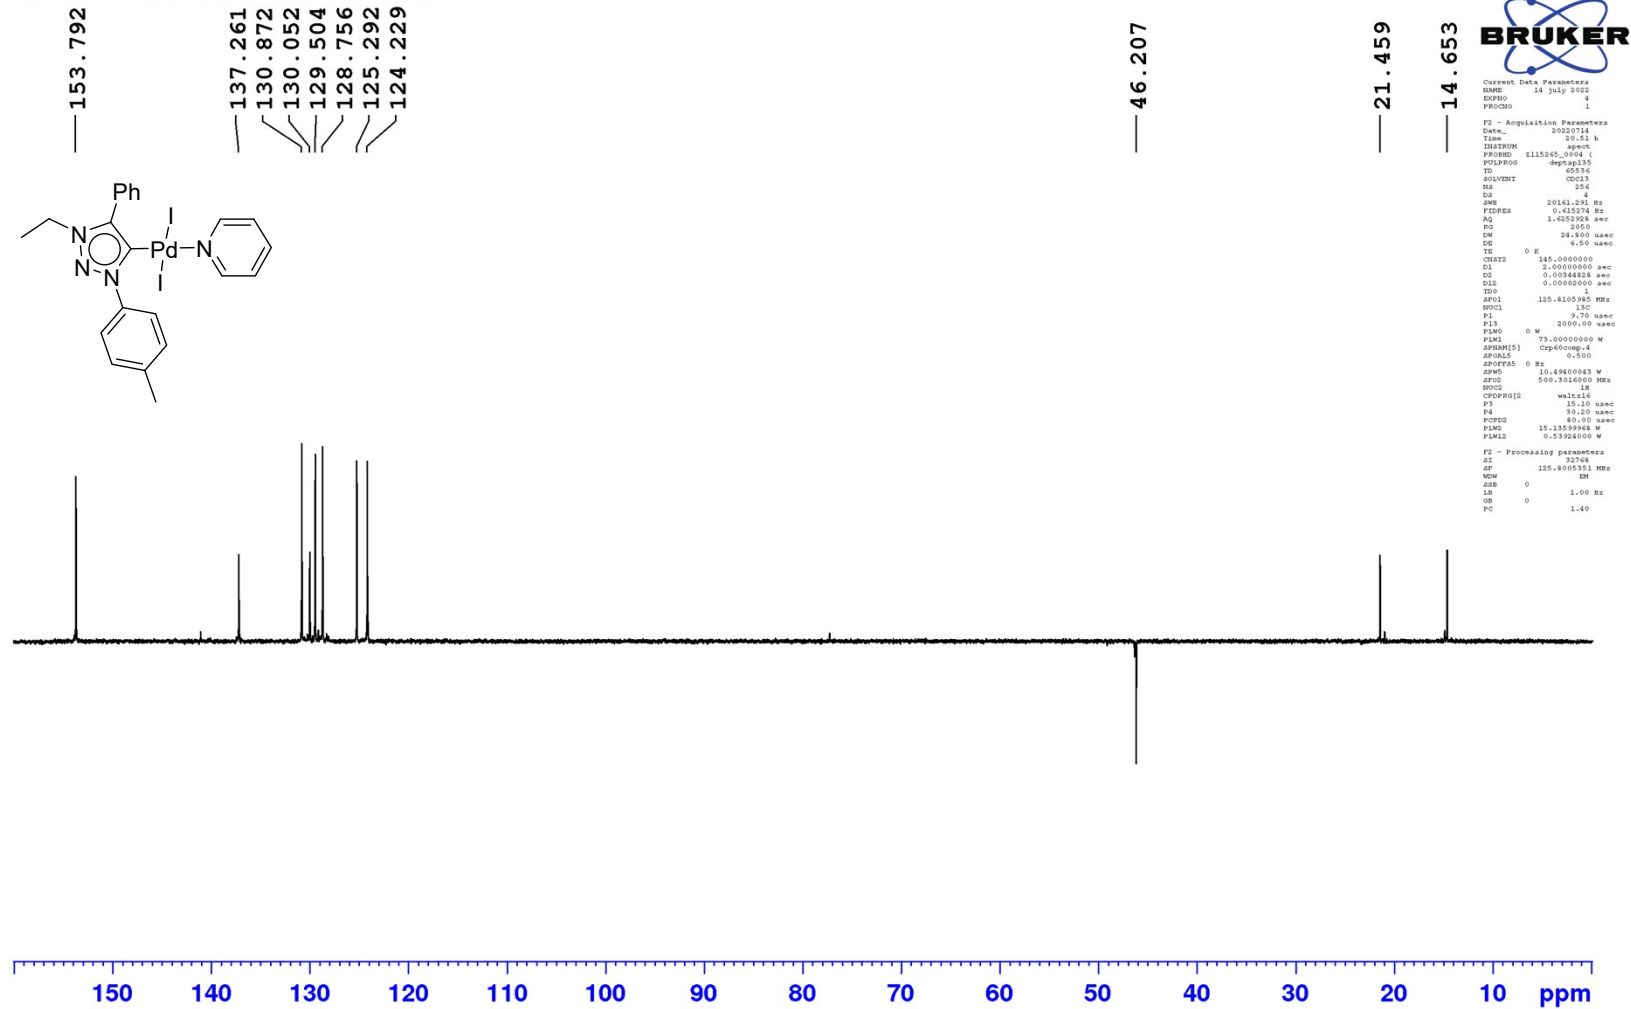

Figure S6. DEPT135 NMR spectrum of 2a in CDCl<sub>3</sub>

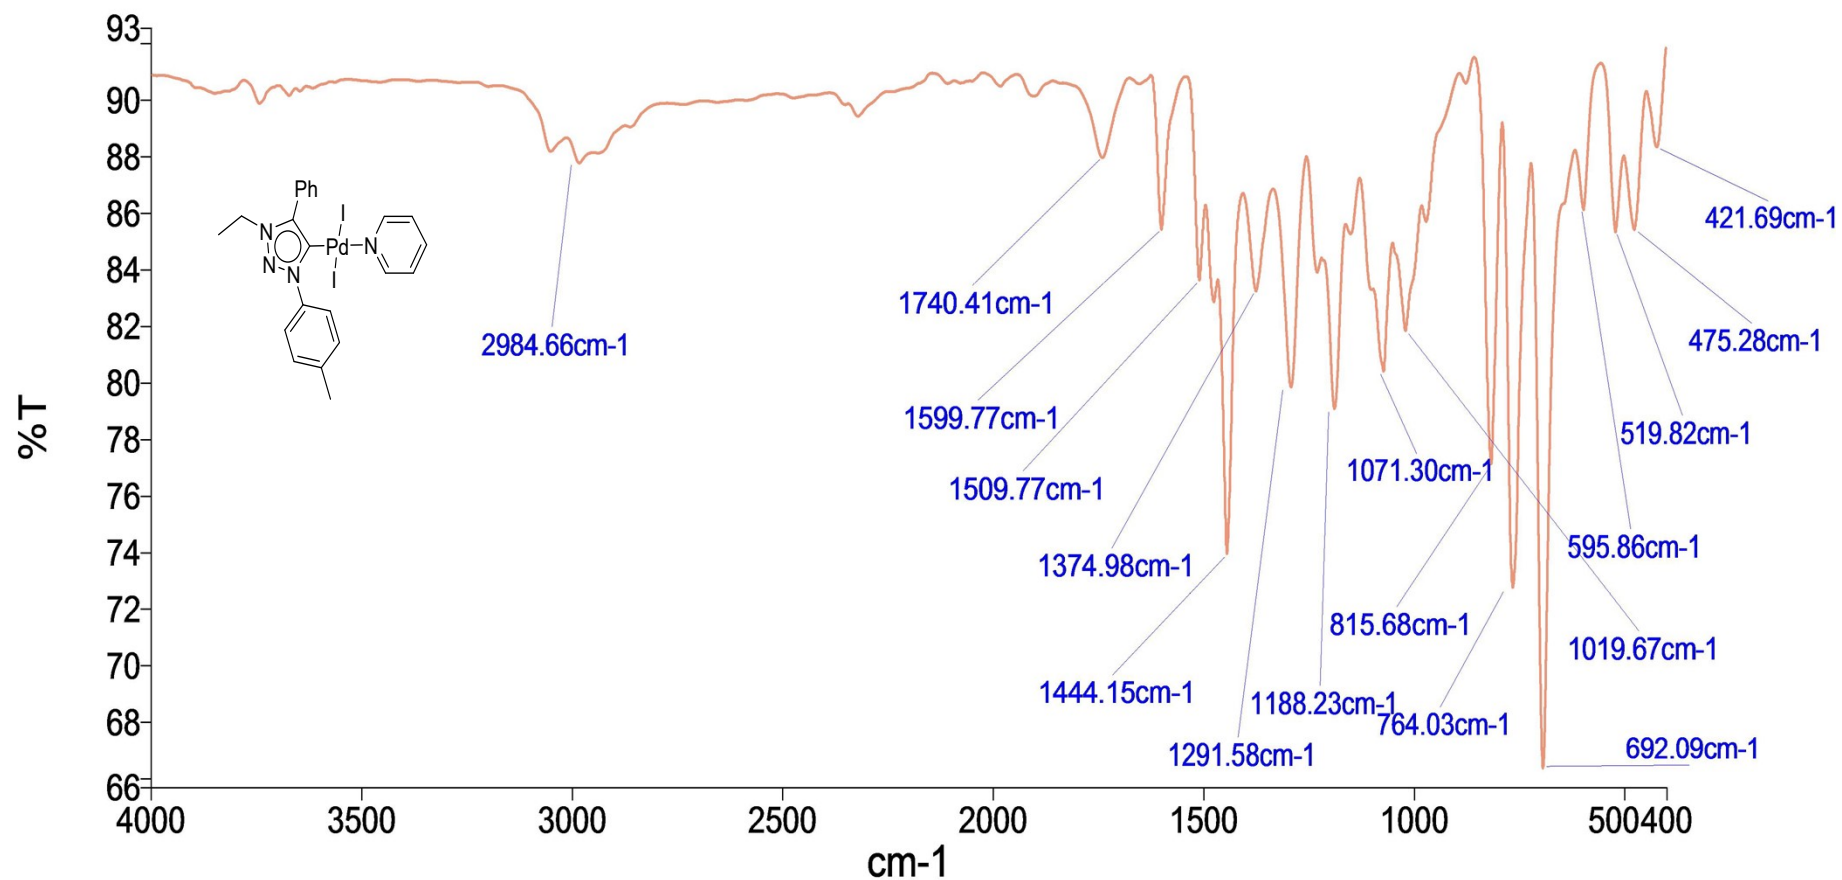

Figure S7. IR spectrum of 2a in KBr



CHNS Report

Operator ID:  
 Company name:  
 Method filename: E:\Method\19-02-2021.mth  
 Method name: 19-02-2021  
 Analysed: 02/19/2021 15:47  
 Printed: 02-19-2021 18:33  
 Elemental Analyser method:  
 Sampler method:  
 Sample ID: CD-OP-1-226 (# 28)  
 Analysis type: UnkNown  
 Chromatogram filename: CD-OP-1-226-19-2--2021.dat  
 Calibration method: K Factors  
 Sample weight: 2.666  
 Protein factor: 6.25

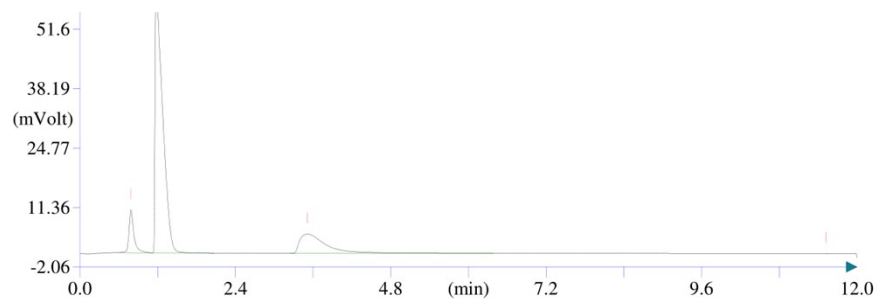

| Retention Time<br>(min) | Area<br>(.1* $\mu$ V*sec) | Component Name | Element % |
|-------------------------|---------------------------|----------------|-----------|
| 0.783                   | 505311                    | Nitrogen       | 7.428     |
| 1.175                   | 4919907                   | Carbon         | 37.591    |
| 3.508                   | 1256201                   | Hydrogen       | 3.123     |
| 11.525                  | 9913                      |                | 0.000     |
|                         | 6691331                   |                | 48.142    |

**Figure S8.** Elemental Analysis data of **2a**

CD-OP-1-335-OTf-1H

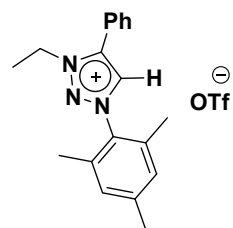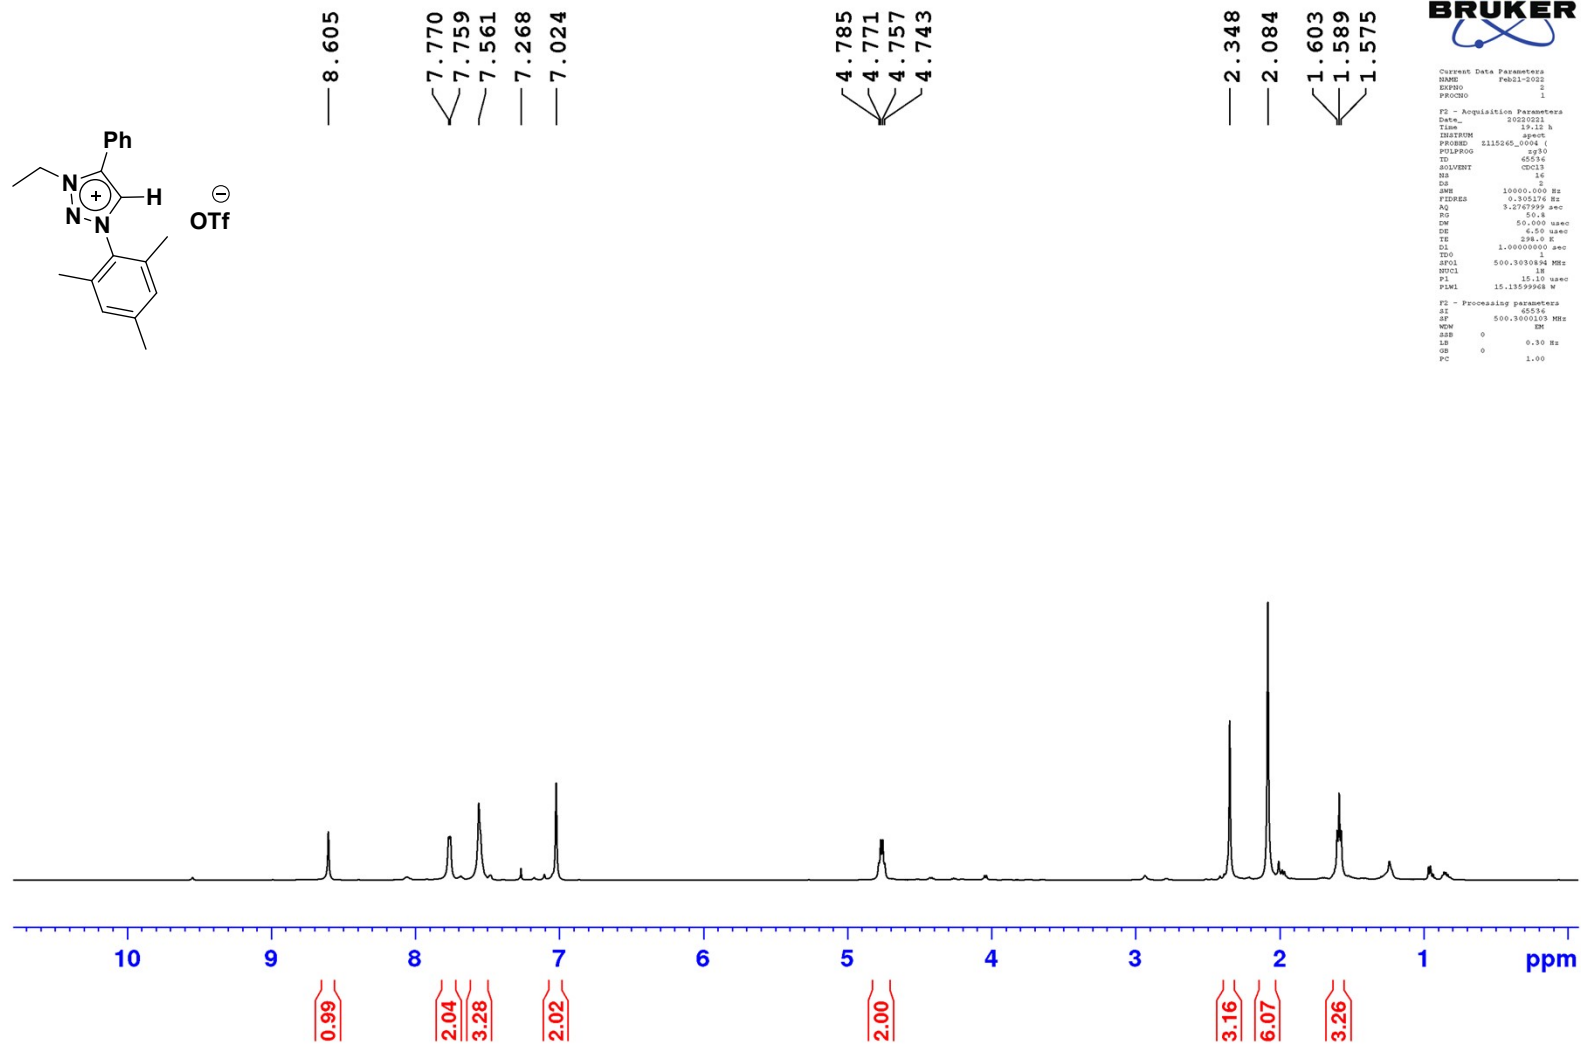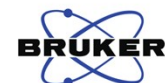

Current Data Parameters  
NAME Feb11-2021  
EXPNO 2  
PROCNO 1

F2 - Acquisition Parameters  
Date\_ 20210211  
Time 19.12 h  
INSTRUM spect  
PROBHD z115245\_0094 (1  
PULPROG zgpg30  
ID 65516  
SOLVENT CDCl3  
NS 16  
DS 2  
SWH 10000.000 Hz  
FIDRES 0.300276 Hz  
AQ 3.2787959 sec  
RG 65.8  
DM 50.000 usec  
DE 4.50 usec  
TE 298.0 K  
DQ 1.00000000 sec  
TD 1  
FID 500.3030494 MHz  
SFO1 18  
NUC1 15.10 usec  
PL 15.13599948 W

F2 - Processing parameters  
SI 65516  
SF 500.3000103 MHz  
WDW EM  
SSB 0  
LB 0.30 Hz  
GB 0  
PC 1.00

Figure S9. <sup>1</sup>H NMR spectrum of **1b** in CDCl<sub>3</sub>

CD-OP-1-335-OTf-13C

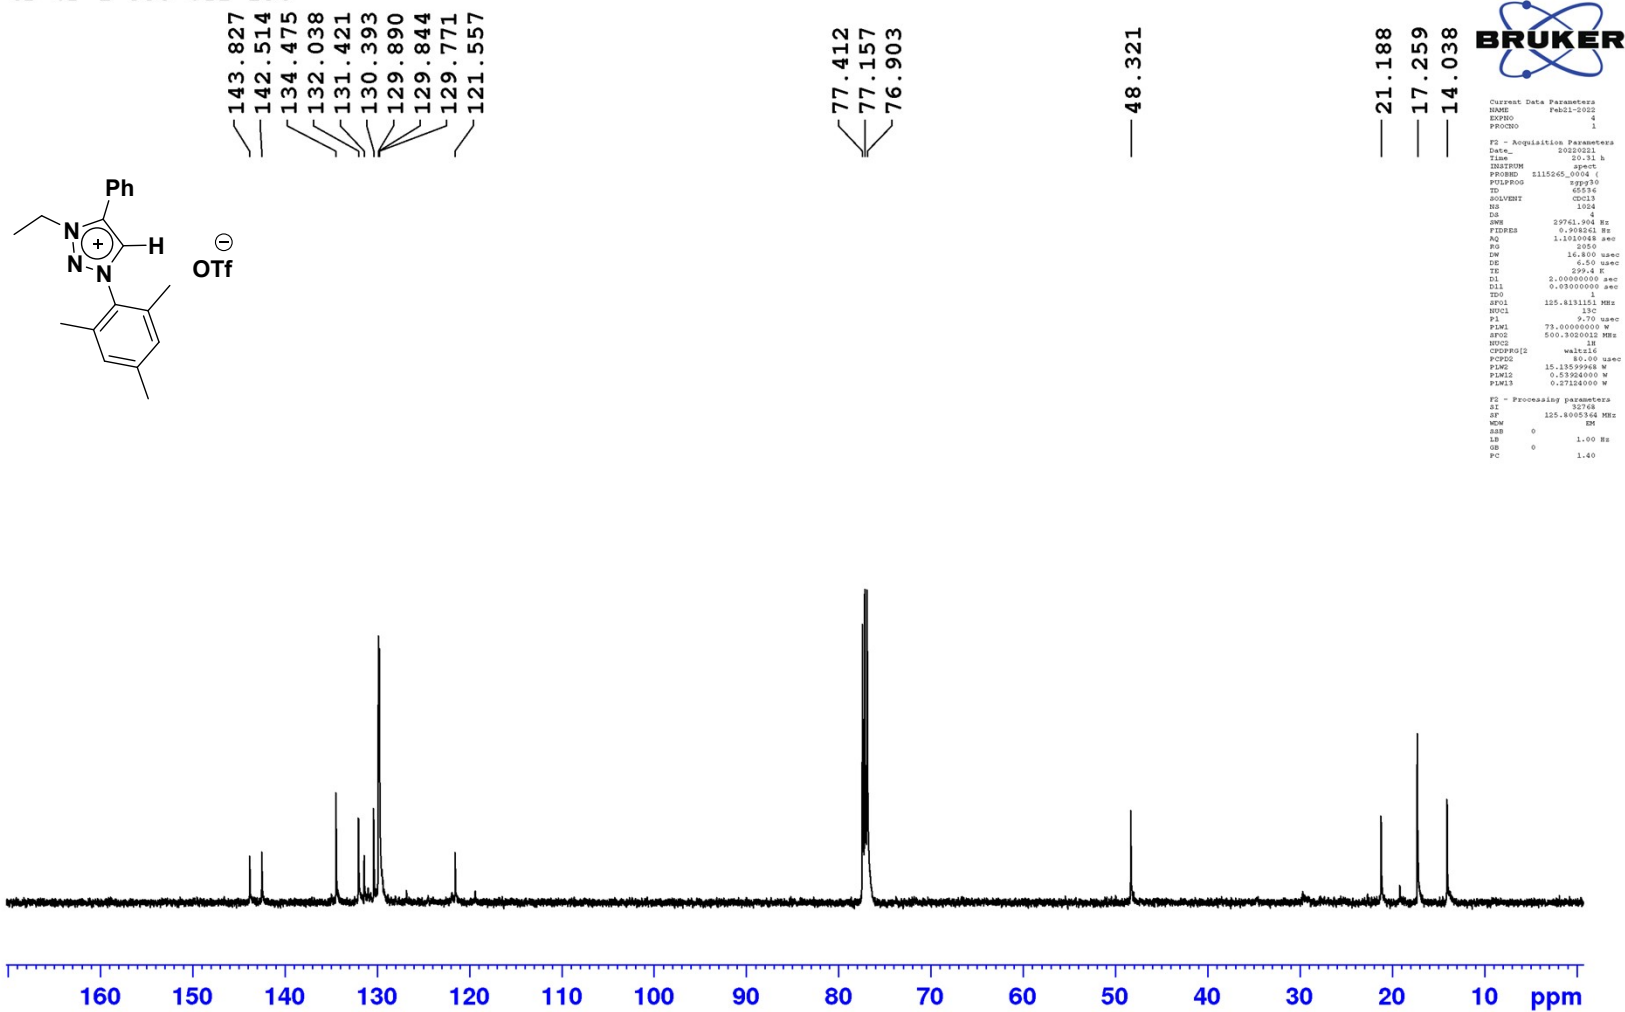

Figure S10.  $^{13}\text{C}\{^1\text{H}\}$  NMR spectrum of **1b** in  $\text{CDCl}_3$

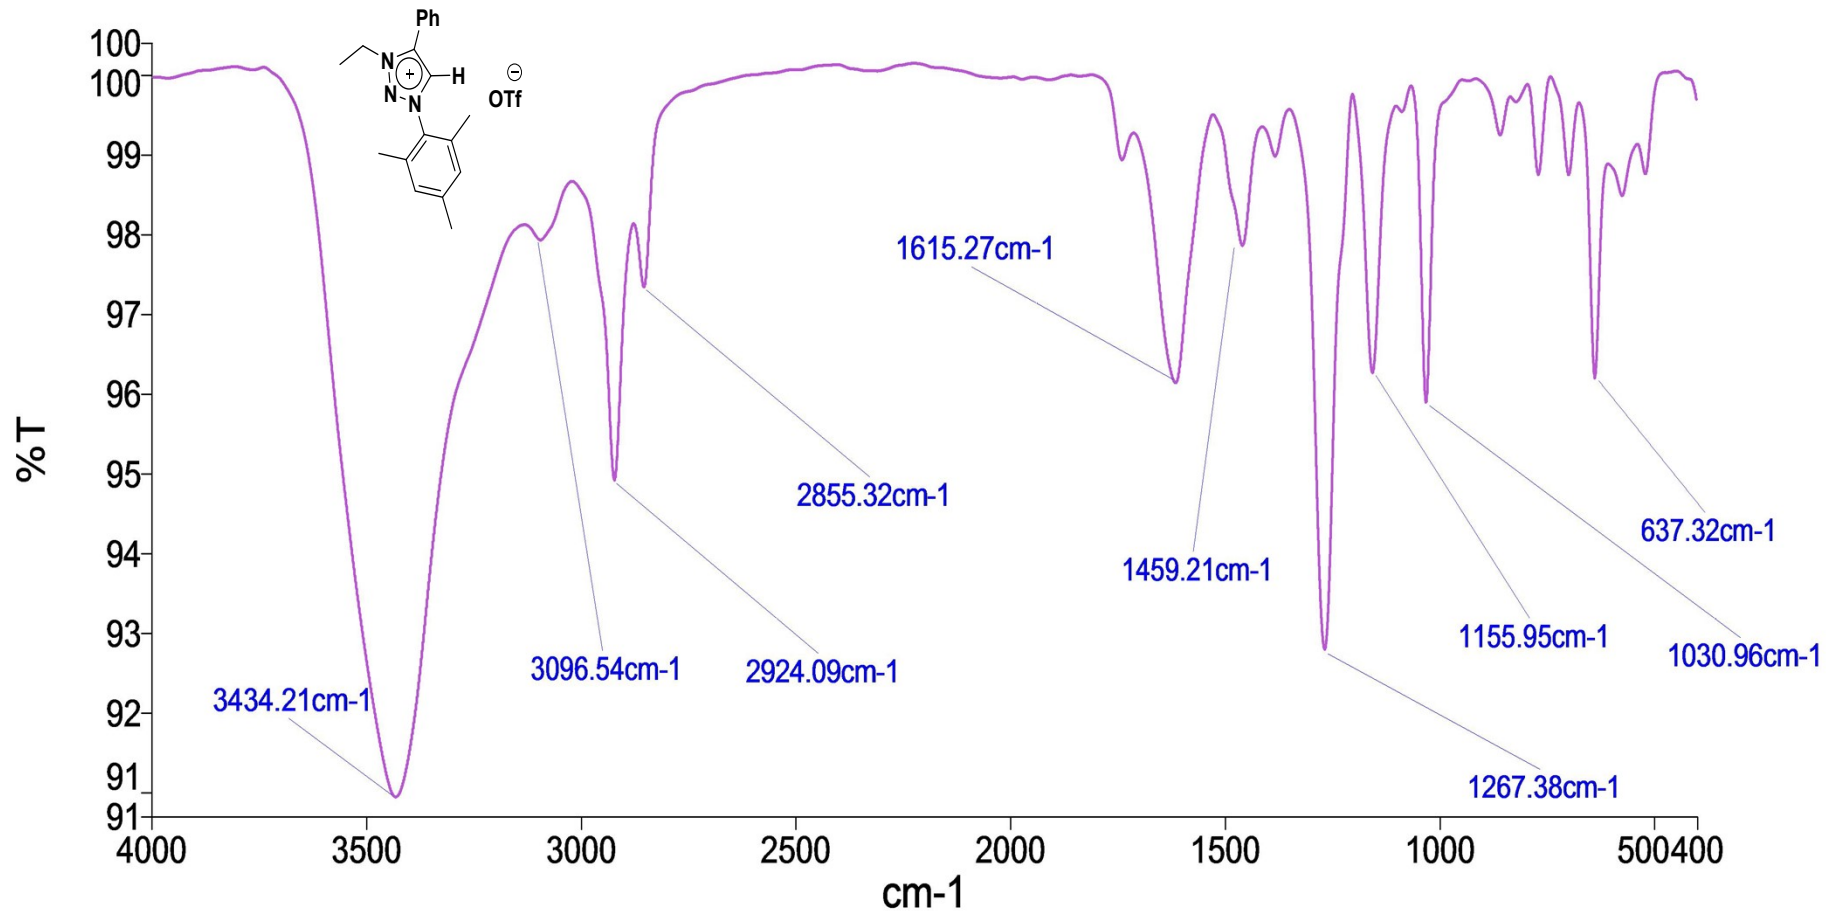

Figure S11. IR spectrum of **1b** in KBr

CD-OP-1-236

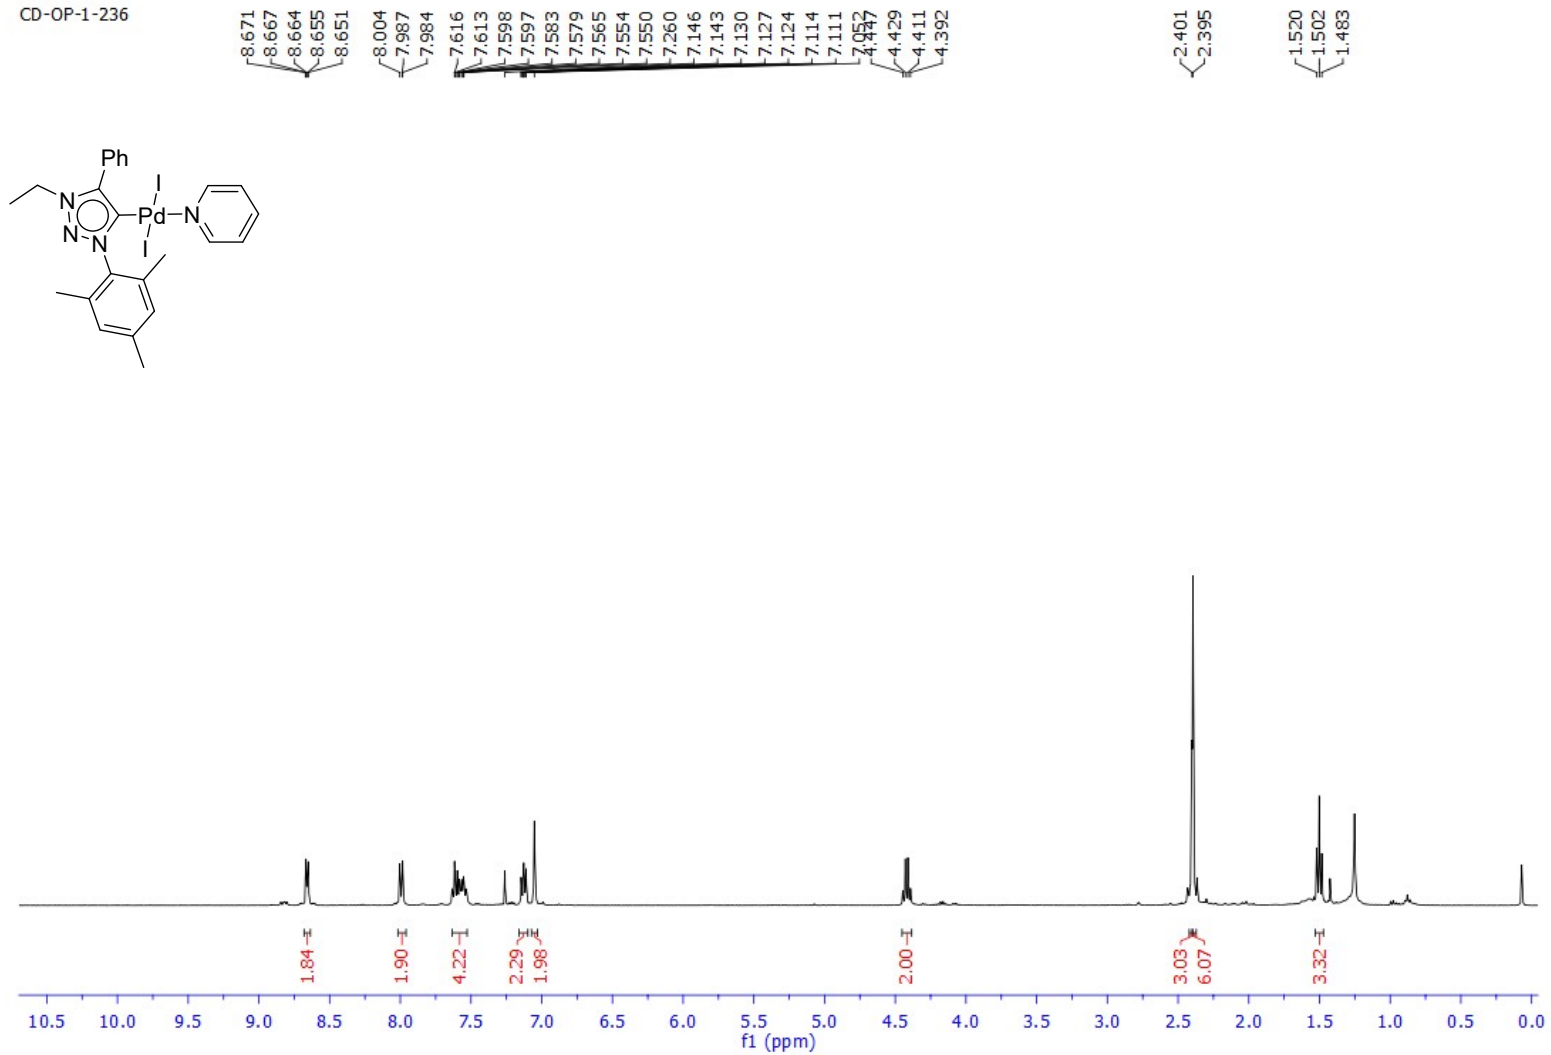

Figure S12. <sup>1</sup>H NMR spectrum of **2b** in CDCl<sub>3</sub>

CD-OP-1-236-13C-30.7.22

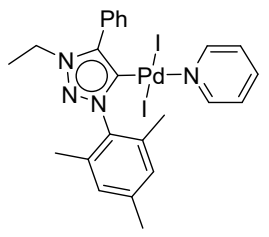

153.828  
144.829  
140.412  
137.703  
137.126  
135.896  
135.791  
131.245  
130.099  
129.625  
128.686  
128.312  
124.102

77.411  
77.157  
76.904

46.204

21.485  
21.387  
14.909

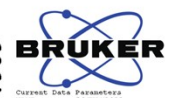

```
Current Data Parameters
NAME          300012022
EXPNO         4
PROCNO        1

F2 - Acquisition Parameters
Date_         20220730
Time          22:24.8
INSTRUM       spect
PROBHD        1H5265_0104 (
PULPROG       zgpg30
SU            GSSG
SOLVENT       CDCl3
DS            2048
DA            4
SHE           29761.904 Hz
FIDRES        0.208261 Hz
AQ            1.1020848 sec
RG            2050
DM            16.850 usec
DE            6.50 usec
TE            0 K
D1            2.00000000 sec
D11           0.03000000 sec
TD           1
SFO1          125.811111 MHz
NUC1           13C
P1            9.70 usec
PL1           75.00000000 W
SFO2          500.1302012 MHz
NUC2           1H
PCPD012       waltz16
PCPD0         80.00 usec
PLM0          15.1359968 W
PLM12         0.53924000 W
PLM13         0.27224000 W

F2 - Processing parameters
SI            32768
SF            125.8005192 MHz
WDW           EM
SSB           0
LB            1.00 Hz
GB            0
PC            1.40
```

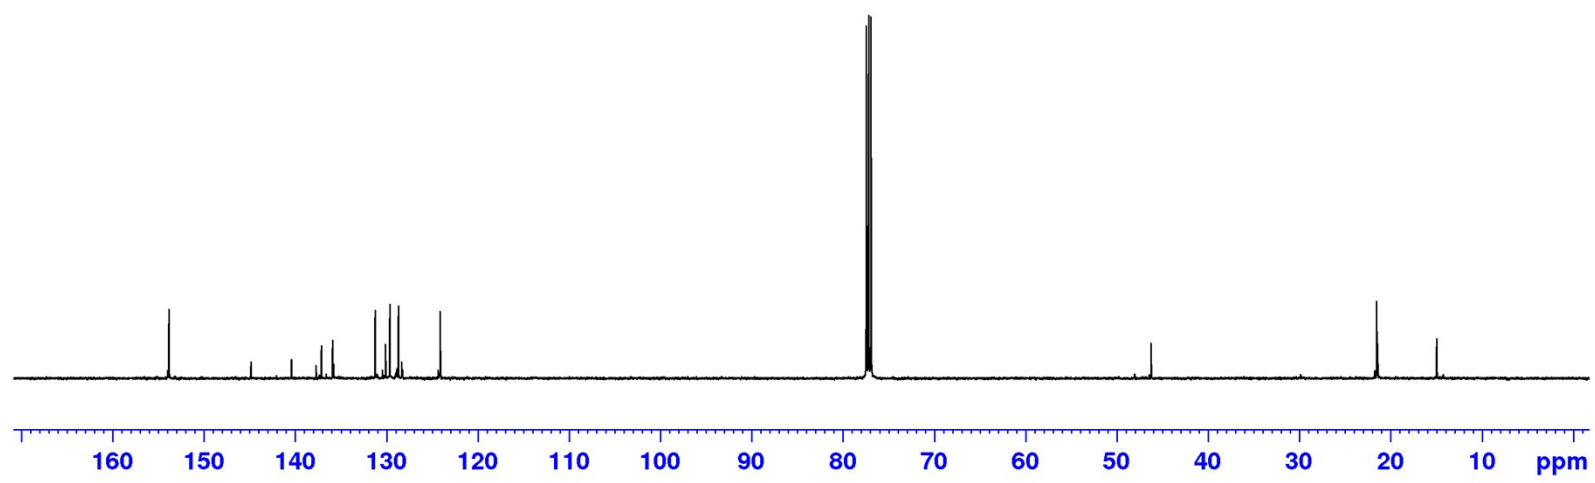

Figure S13.  $^{13}\text{C}\{^1\text{H}\}$  NMR spectrum of **2b** in  $\text{CDCl}_3$

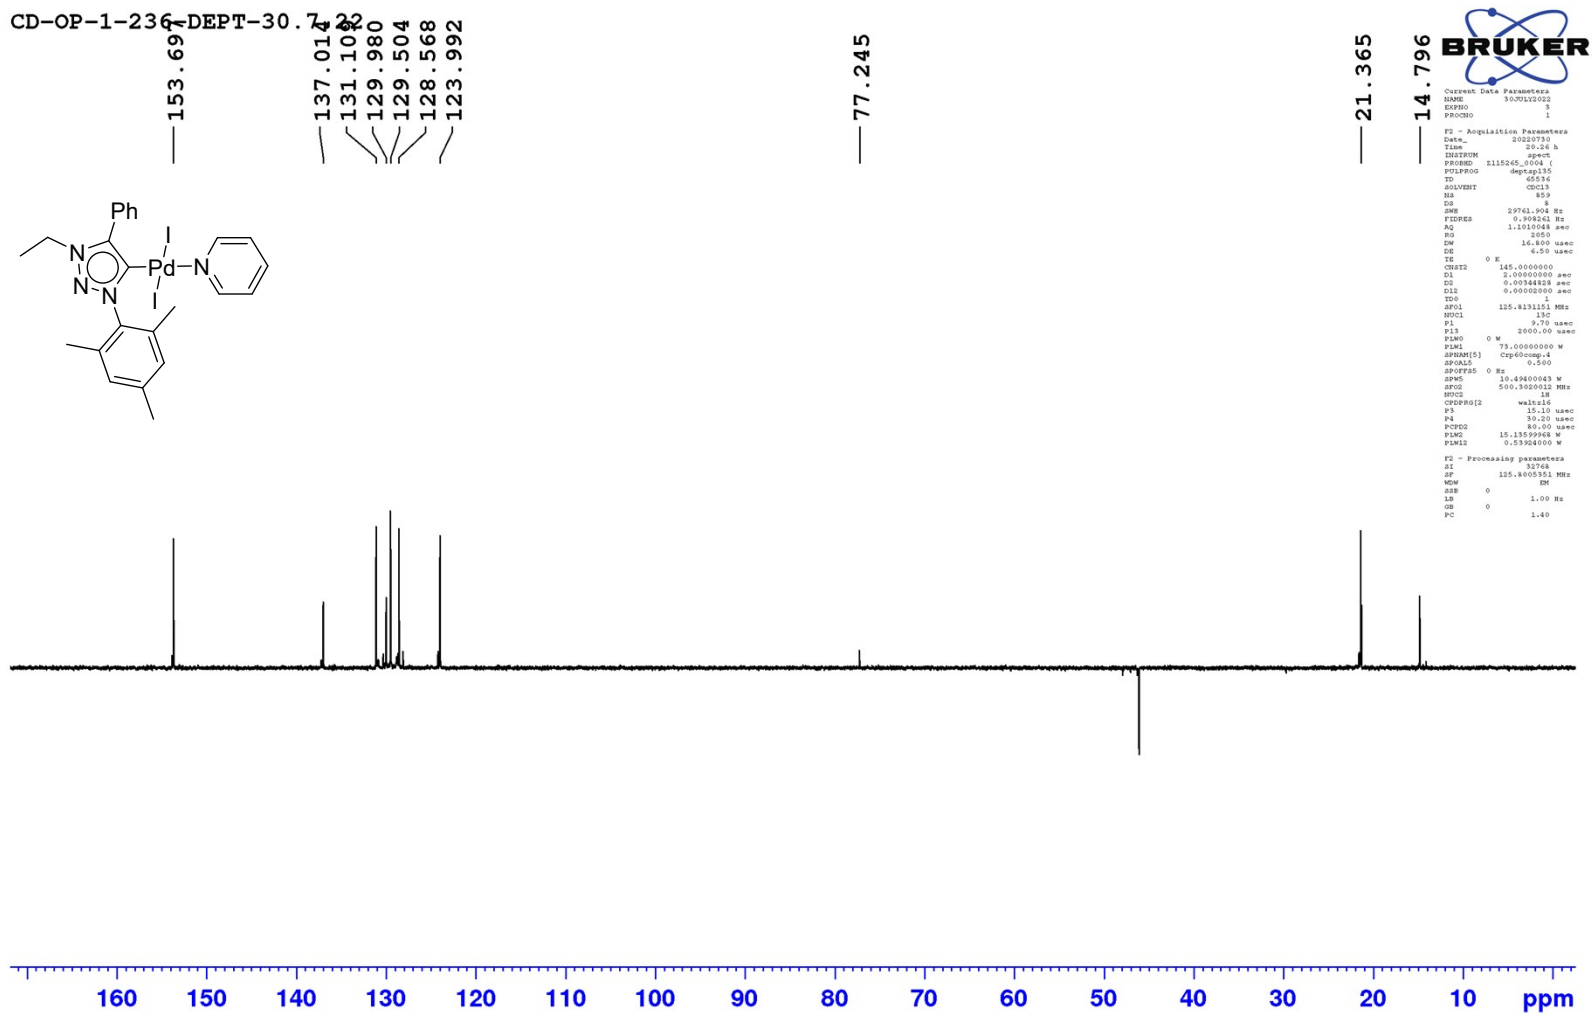

Figure S14. DEPT135 NMR spectrum of **2b** in  $\text{CDCl}_3$

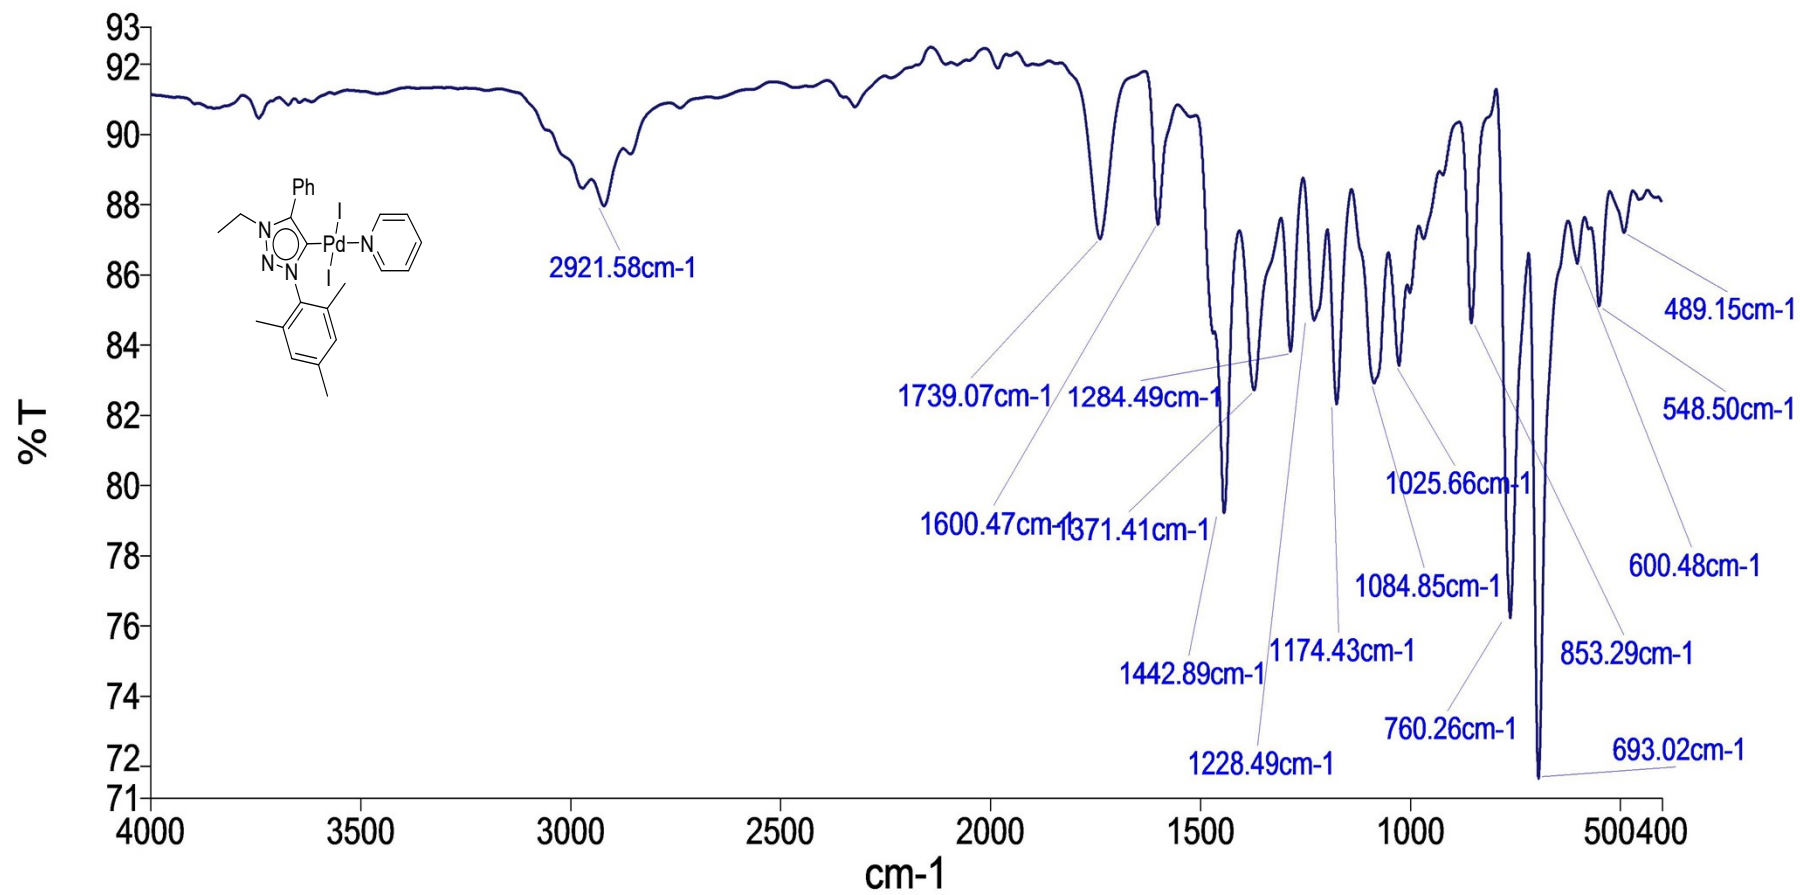

Figure S15. IR spectrum of **2b** in KBr



CHNS Report

Operator ID:  
 Company name:  
 Method filename: E:\Method\19-02-2021.mth  
 Method name: 19-02-2021  
 Analysed: 02/19/2021 15:23  
 Printed: 02-19-2021 18:32  
 Elemental Analyser method:  
 Sampler method:  
 Sample ID: CD-OP-1-215 (# 26)  
 Analysis type: UnkNown  
 Chromatogram filename: CD-OP-1-215-19-02-2021.dat  
 Calibration method: K Factors  
 Sample weight: 3.175  
 Protein factor: 6.25

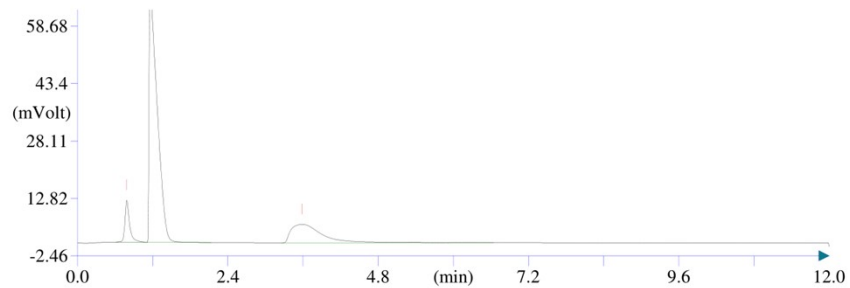

| Retention Time<br>(min) | Area<br>(.1* $\mu$ V*sec) | Component Name | Element % |
|-------------------------|---------------------------|----------------|-----------|
| 0.783                   | 567889                    | Nitrogen       | 7.208     |
| 1.158                   | 6062293                   | Carbon         | 38.901    |
| 3.583                   | 1704203                   | Hydrogen       | 3.563     |
|                         | 8334385                   |                | 49.672    |

**Figure S16.** Elemental Analysis data of **2b**

CD-OP-1-343-1H

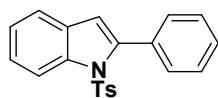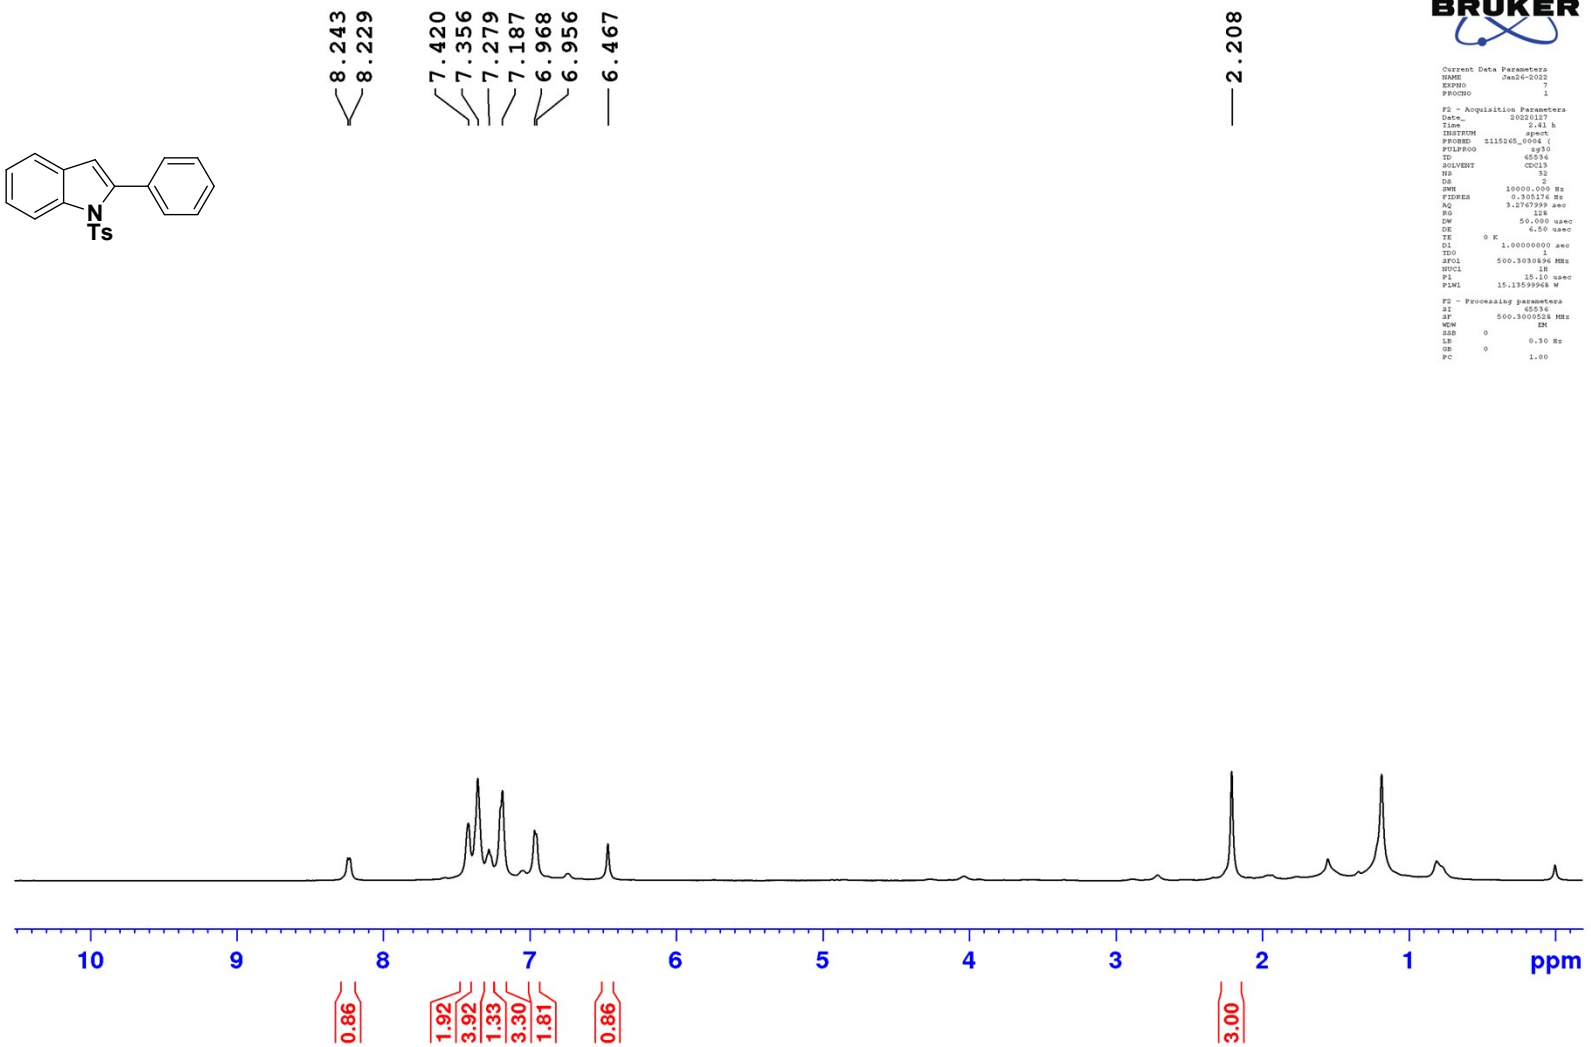

Figure S17. <sup>1</sup>H NMR spectrum of 3ah in CDCl<sub>3</sub>

CD-OP-1-343-13C

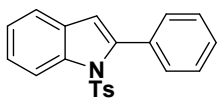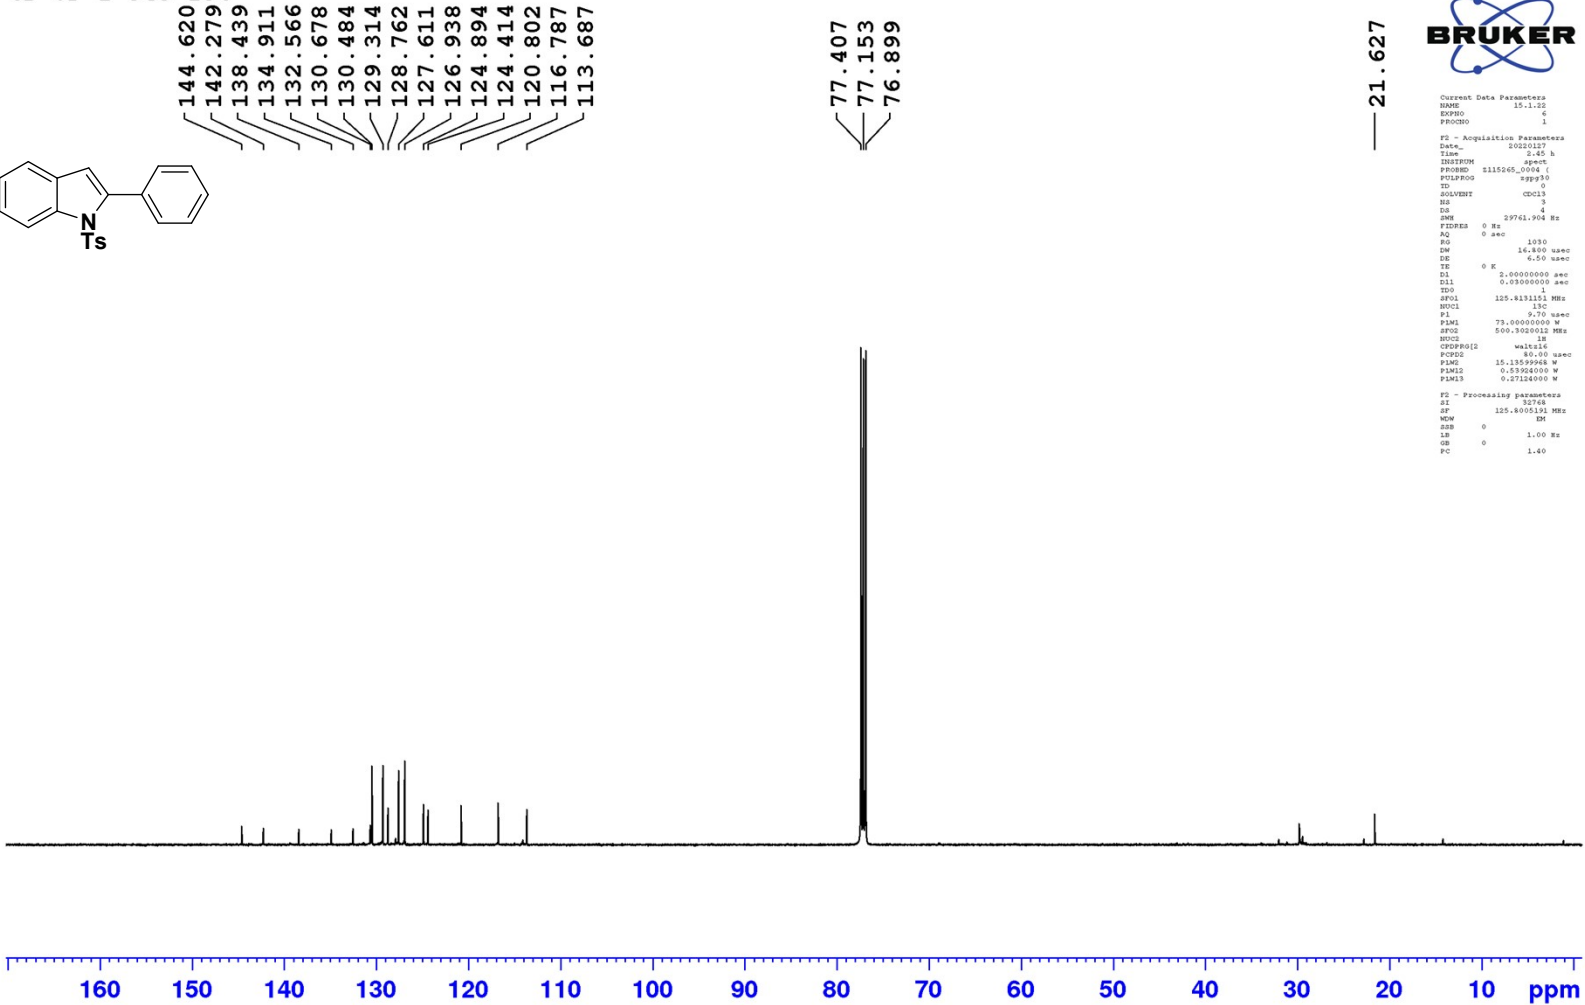

Figure S18.  $^{13}\text{C}\{^1\text{H}\}$  NMR spectrum of **3ah** in  $\text{CDCl}_3$

CD-OP-1-345

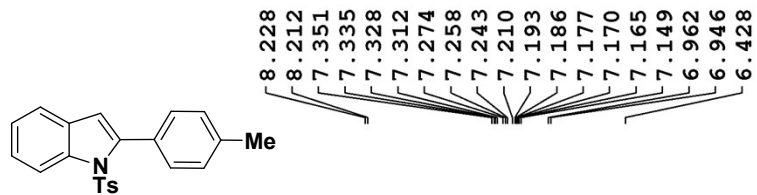

8.228  
8.212  
7.351  
7.335  
7.328  
7.312  
7.274  
7.258  
7.243  
7.210  
7.193  
7.186  
7.177  
7.170  
7.165  
7.149  
6.962  
6.946  
6.428

2.361  
2.198

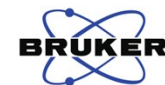

Current Data Parameters  
NAME 20220220  
EXPNO 1  
PROCNO 1  
F2 - Acquisition Parameters  
Date\_ 20220220  
Time 18.41 h  
INSTRUM spect  
PROBHD E115265\_004 (4  
PULPROG zgpg  
TD 65536  
SOLVENT CDCl3  
NS 32  
DS 2  
SWH 10000.000 Hz  
FIDRES 0.246174 Hz  
AQ 3.2747599 sec  
RG 300  
EW 50.000 kHz  
EQ 6.50 kHz  
TE 300 K  
D1 1.00000000 sec  
TDO 0.00000000 sec  
SFO1 500.305054 MHz  
HFQC1 1H  
P1 15.10000000 sec  
PLM1 15.13599968 W  
F2 - Processing parameters  
SI 65536  
SF 500.305054 MHz  
WDW EM  
SSB 0  
LB 0.30 Hz  
GB 0  
PC 1.00

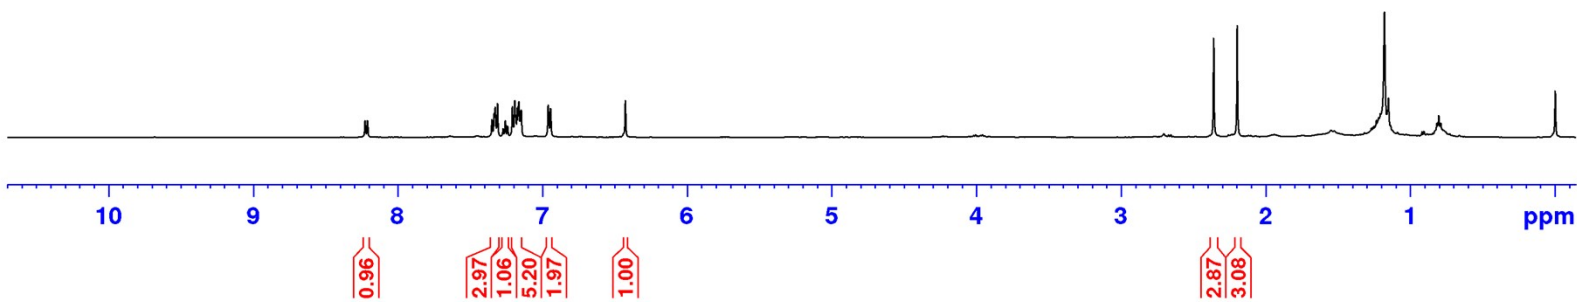

Figure S19. <sup>1</sup>H NMR spectrum of 3ai in CDCl<sub>3</sub>

CD-OP-1-345C13

144.5673  
142.4533  
138.735  
138.370  
134.869  
130.792  
130.343  
129.695  
129.286  
128.382  
126.940  
124.736  
124.389  
120.703  
116.802  
113.386

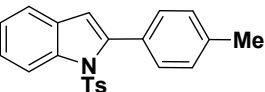

77.409  
77.156  
76.902

29.829  
21.557

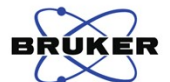

```
Current Data Parameters
NAME      Jan22-2022
EXPNO    4
PROCNO   1
-----
F2 - Acquisition Parameters
Date_    20220122
Time     19:33 h
INSTRUM  spect
PROBHD   515245_004 1
PULPROG  zgpg30
TD        65536
SOLVENT  CDCl3
DE        32.77
DS        4
SWH       23741.904 Hz
FIDRES   0.392641 Hz
AQ        1.1010048 sec
RG         1030
DE         16.800 usec
QE         6.50 usec
TE        0 K
D1         2.00000000 sec
d11       0.03000000 sec
SFO1      125.8131151 MHz
NUC1       13C
P1         9.70 usec
PL1        73.00000000 W
SFO2      500.3000152 MHz
NUC2       1H
PCPD02    waltz16
PCPD0     80.00 usec
PAC        15.11359948 W
PLM1      0.53924000 W
PLM3      0.27124000 W
-----
F2 - Processing Parameters
SI         32768
SF         125.8005175 MHz
MSB        0
LS         0
GB         0
OR         1.00 Hz
PC         1.40
```

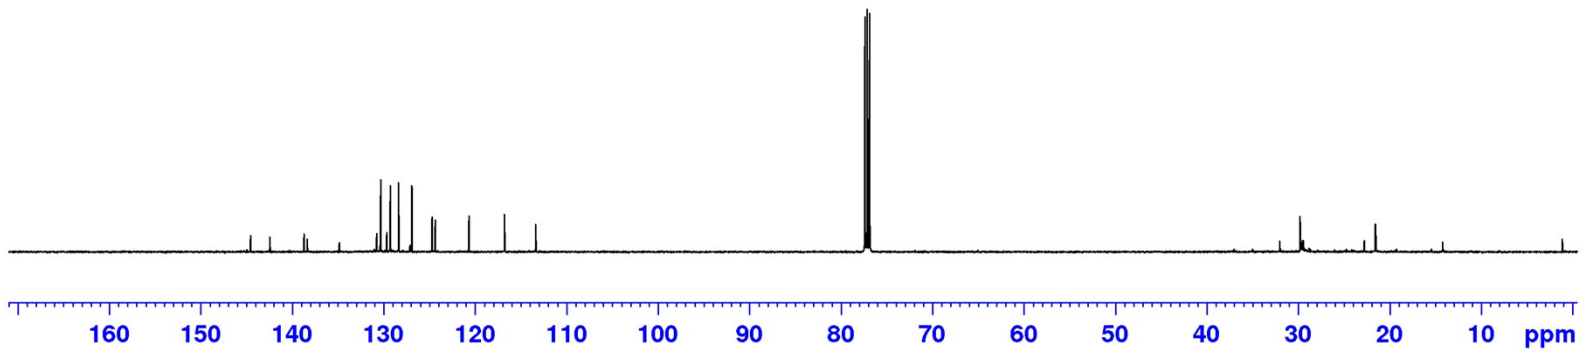

Figure S20.  $^{13}\text{C}\{^1\text{H}\}$  NMR spectrum of **3ai** in  $\text{CDCl}_3$

CD-OP-351-1H

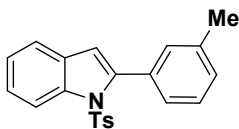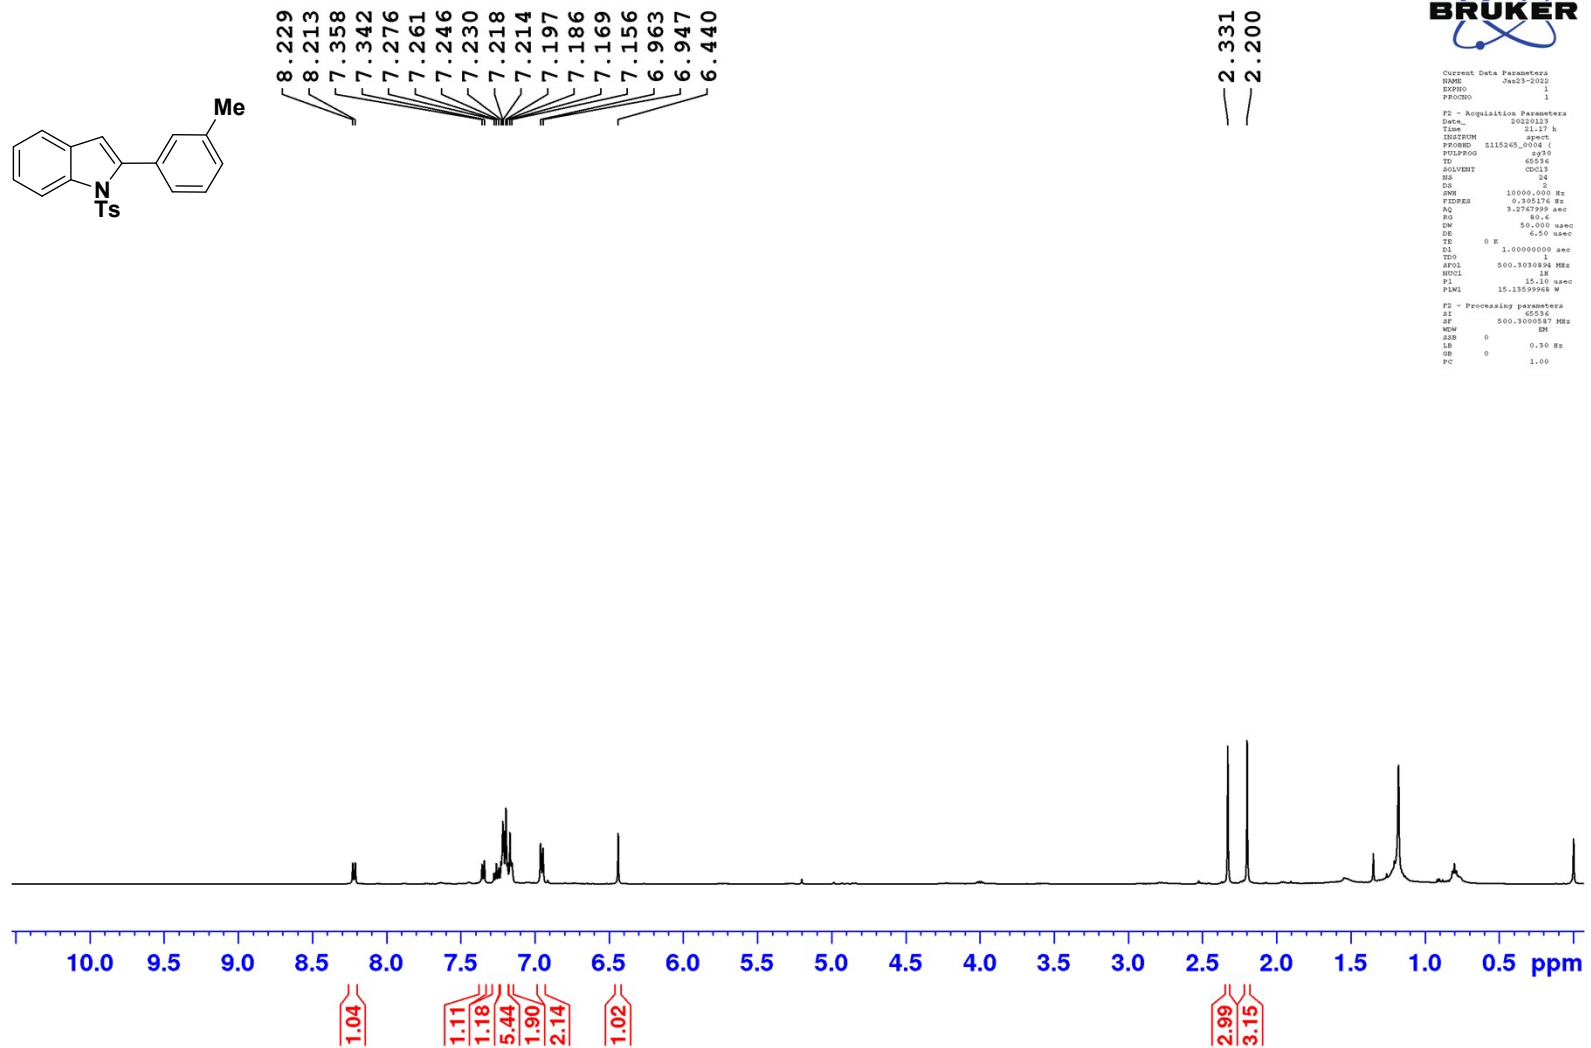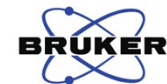

Current Data Parameters  
NAME 0a21-2022  
EXPNO 1  
PROCNO 1

F2 - Acquisition Parameters  
Date\_ 20220113  
Time 21:17 h  
INSTRUM spect  
PROBHD 1H5245\_0094 f  
PULPROG zgpg30  
TD 65534  
SOLVENT CDCl3  
NS 54  
DS 2  
SWH 10000.000 Hz  
FIDRES 0.305176 Hz  
AQ 1.2747999 sec  
RG 80.4  
EM 50.000 usec  
DE 6.50 usec  
TE 0 K  
DQ 1.0000000 sec  
DI 11  
SFO 500.1308194 MHz  
NUC1 15.10 usec  
PI 15.11559948 W  
PLM1 15.11559948 W

F2 - Processing parameters  
SI 65534  
SF 500.1308194 MHz  
WDW EM  
SSB 0  
LB 0.30 Hz  
GB 0  
PC 1.00

Figure S21. <sup>1</sup>H NMR spectrum of 3aj in CDCl<sub>3</sub>

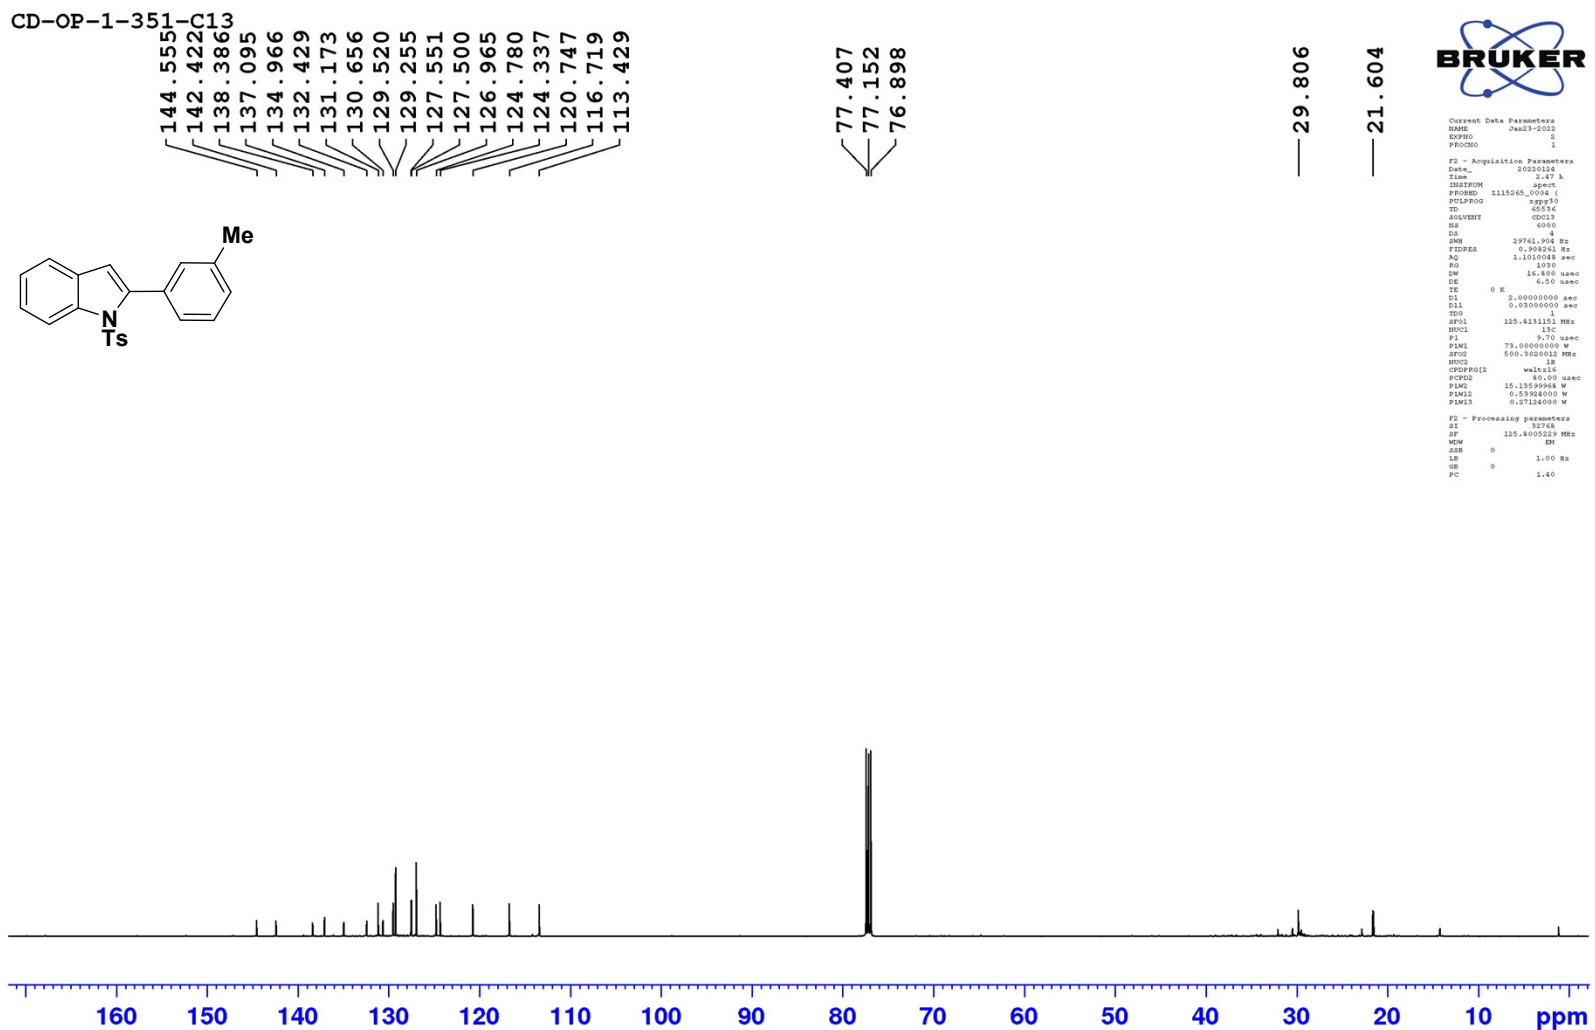

Figure S22.  $^{13}\text{C}\{^1\text{H}\}$  NMR spectrum of **3aj** in  $\text{CDCl}_3$

CD-OP-1-349

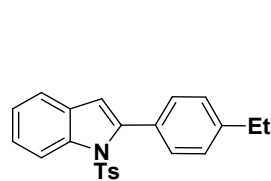

8.219  
8.203  
7.332  
7.317  
7.254  
7.239  
7.223  
7.187  
7.169  
7.150  
7.136  
6.932  
6.916  
6.412

2.667  
2.653  
2.638  
2.624  
2.170

1.231  
1.217  
1.203

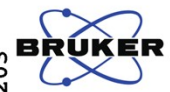

Current Data Parameters  
NAME 3ak01-2002  
EXPNO 4  
PROCNO 1  
F2 - Acquisition Parameters  
Date\_ 20220211  
Time 21:22 h  
INSTRUM agac  
PROBHD 1H5265\_0004 (1  
PULPROG zgpg30  
TD 65536  
SOLVENT CDCl3  
NS 24  
DS 2  
SWH 10000.000 Hz  
FIDRES 0.305176 Hz  
AQ 3.1276799 sec  
RG 64  
DM 50.000 usec  
DE 4.50 usec  
TE 0 K  
D1 1.0000000 sec  
TD0 1  
SFO1 500.130824 MHz  
NUC1 1H  
P1 15.10 usec  
P1M1 15.13559968 M  
F2 - Processing parameters  
SI 65536  
SF 500.130824 MHz  
WDW EM  
SSB 0  
LB 0.30 Hz  
GB 0  
PC 1.00

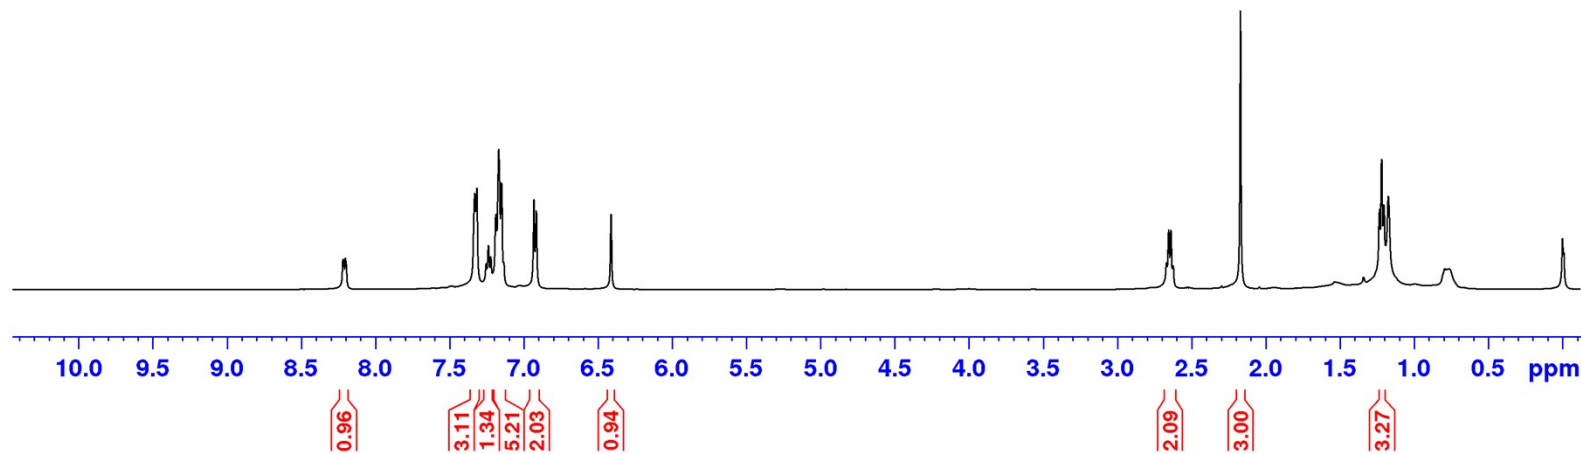

Figure S23. <sup>1</sup>H NMR spectrum of 3ak in CDCl<sub>3</sub>



CD-OP-1-349C13

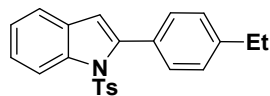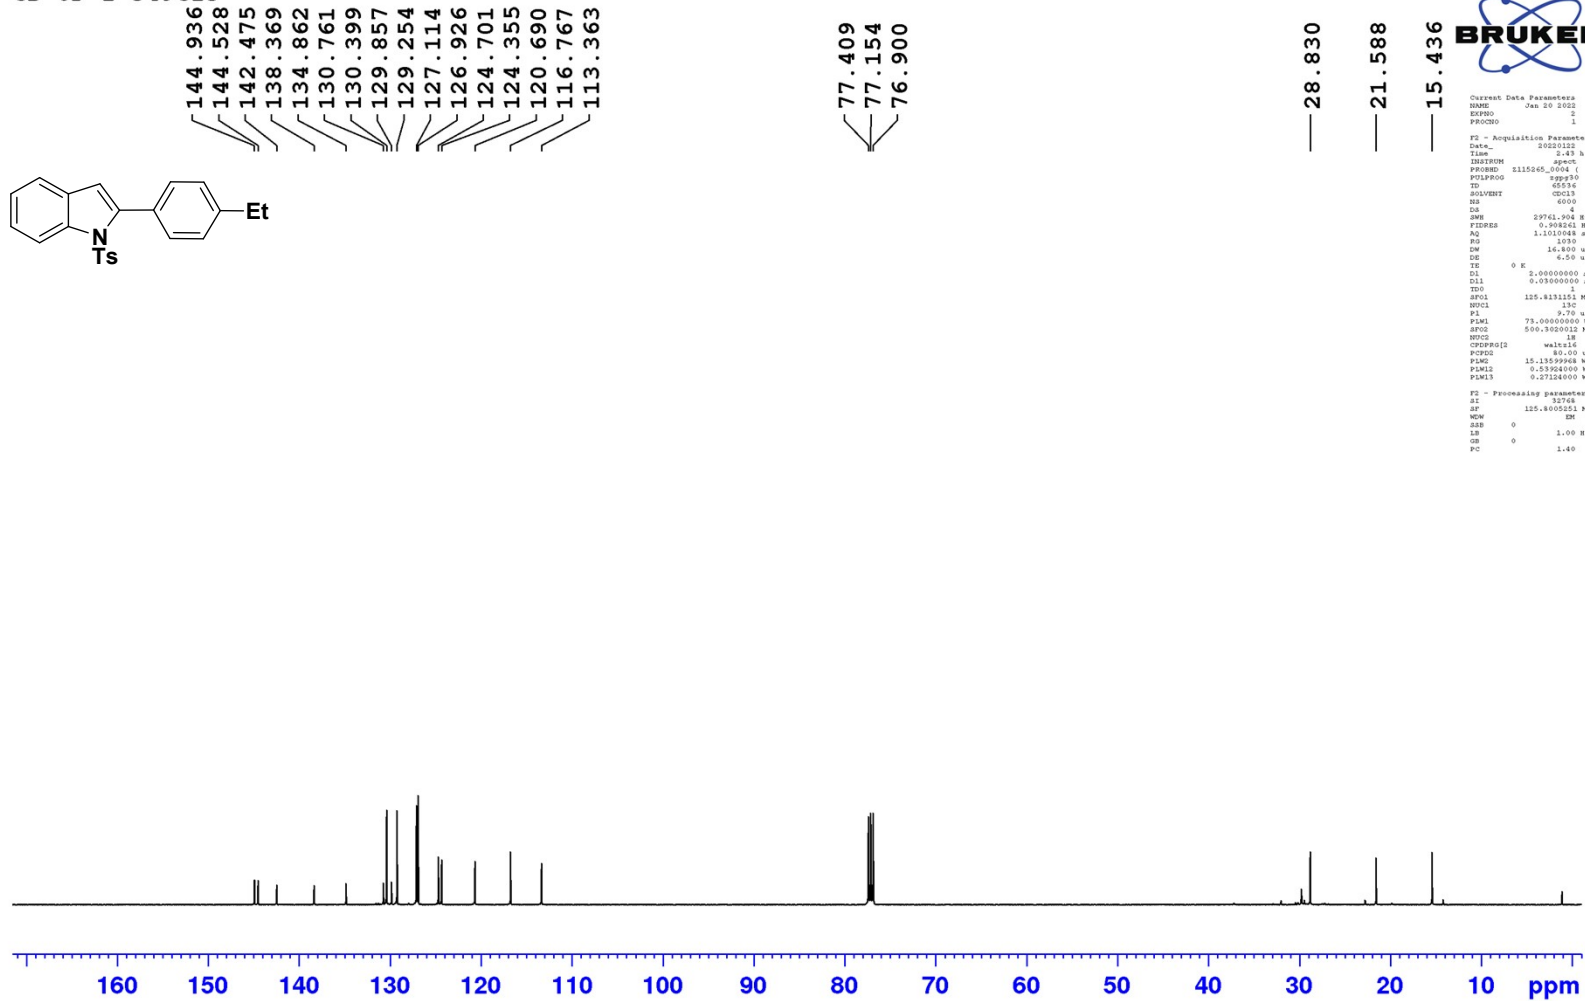

Figure S24.  $^{13}\text{C}\{^1\text{H}\}$  NMR spectrum of 3ak in  $\text{CDCl}_3$

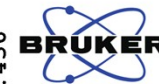

```
Current Data Parameters
NAME      Jan 20 2022
EXPNO    1
PROCNO   1

F2 - Acquisition Parameters
Date_    20221122
Time     1:43 h
INSTRUM  spect
PROBHD   5mmQNP1
PULPROG  zgpg30
TD        65536
SOLVENT  CDCl3
NS        600
DS        4
SWH       29761.904 Hz
FIDRES    0.598261 Hz
AQ        1.1010048 sec
RG         1020
CW         16.800 usec
DE         4.50 usec
TE        0 K
D1         2.00000000 sec
d11        0.03000000 sec
TPO       1
AQF1      125.8131151 MHz
NUC1       13C
P1         8.70 usec
PL1L       73.0000000 W
AF1        500.3000012 MHz
NUC2
CPDPRG2   waltz16
P2FC1     81.00 usec
PL2L      15.1359998 W
PL2R      0.3300000 W
PLM1      0.27124000 W

F2 - Processing parameters
SI         32768
SF         125.8055151 MHz
WDW        EM
SSB        0
LB         1.00 Hz
GB         0
PC         1.40
```

CD-OP-1-352. 1H CDCl3

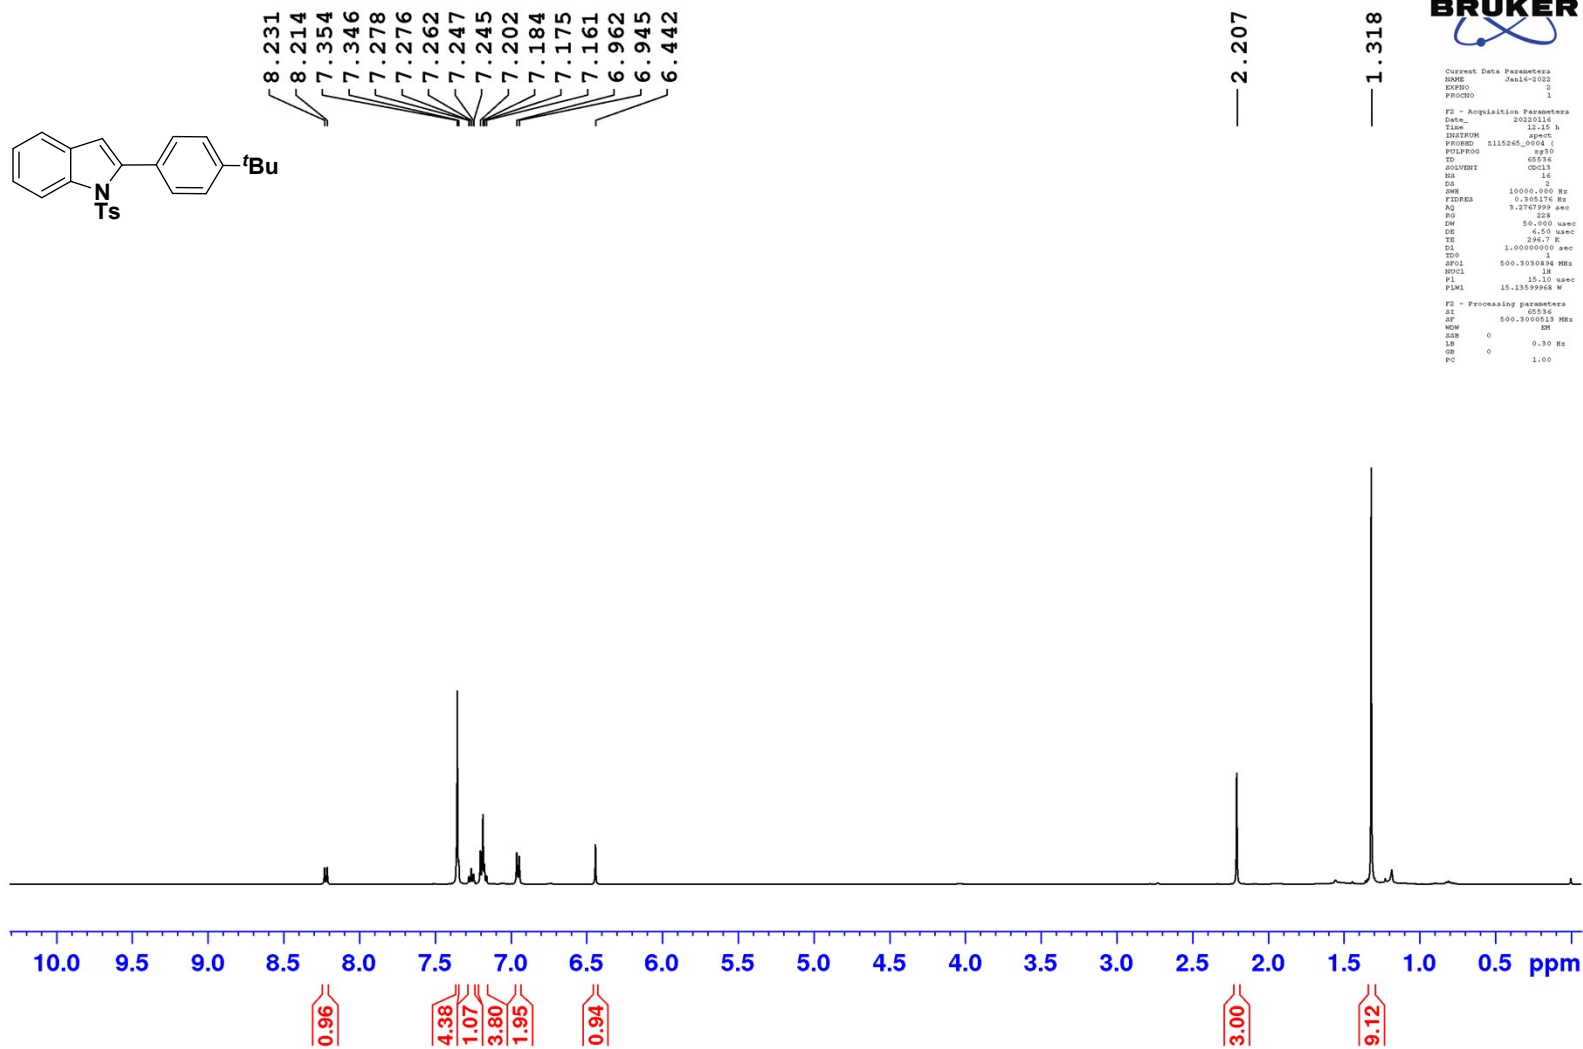

Figure S25. <sup>1</sup>H NMR spectrum of 3al in CDCl<sub>3</sub>

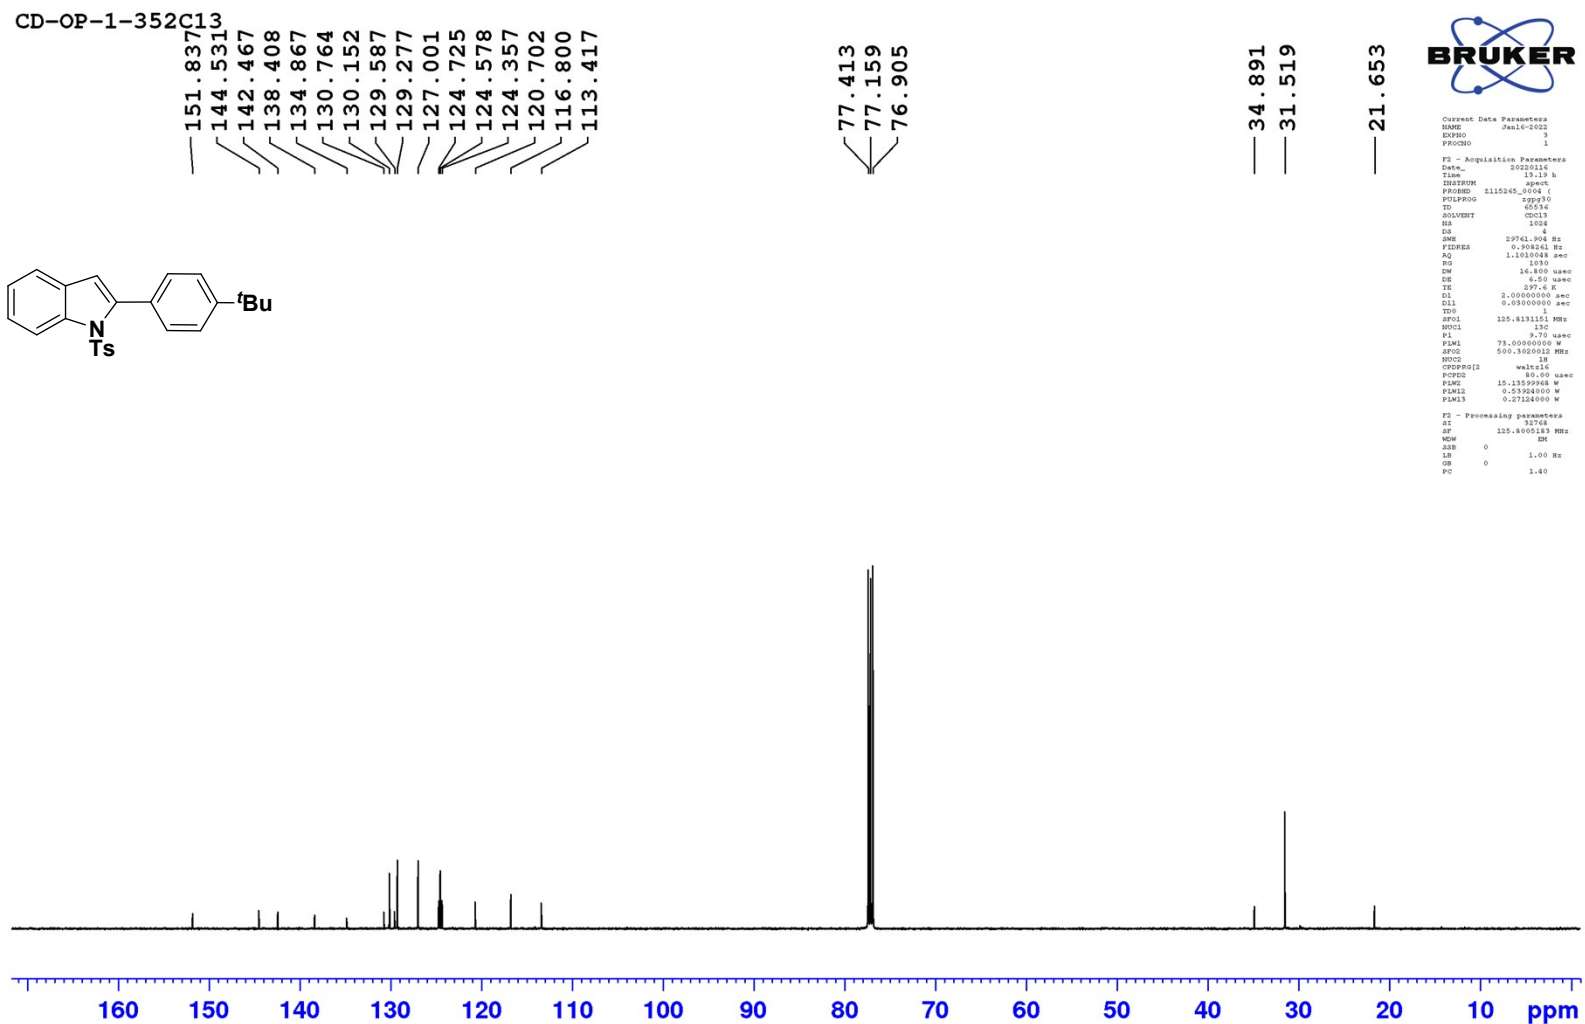

Figure S26.  $^{13}\text{C}\{^1\text{H}\}$  NMR spectrum of **3al** in  $\text{CDCl}_3$

CD-OP-1-356

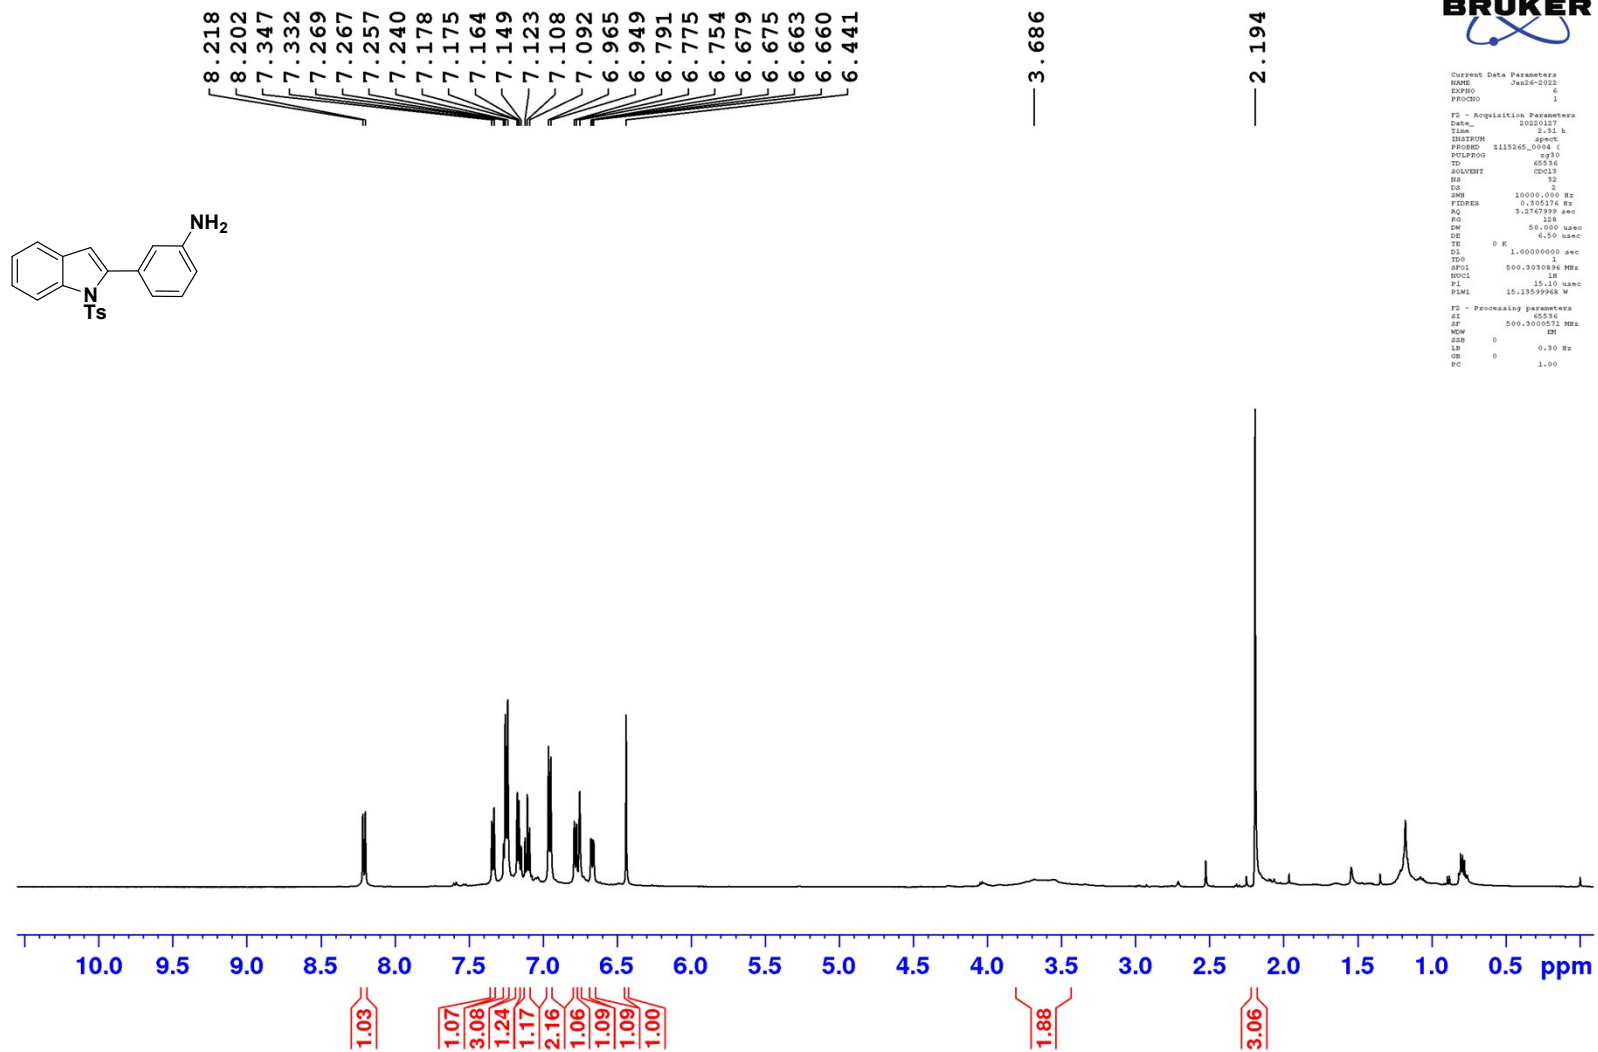

Figure S27. <sup>1</sup>H NMR spectrum of 3am in CDCl<sub>3</sub>

CD-OP-1-356-13c-CDCl<sub>3</sub>

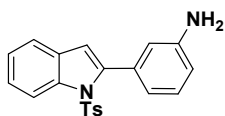

145.687  
144.546  
142.532  
138.407  
134.871  
133.480  
130.690  
129.254  
128.532  
127.015  
124.756  
124.339  
120.777  
120.760  
117.426  
116.763  
115.604  
113.388

77.407  
77.153  
76.899

21.613

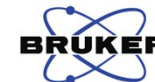

Current Data Parameters  
NAME 26-1 2022  
EXPNO 2  
PROCNO 1  
F2 - Acquisition Parameters  
Date\_ 20220216  
Time 20:55 h  
INSTRUM spect  
PROBHD 1H1266\_0004 (1  
PULPROG zgpg30  
ID 65534  
SOLVENT CDCl3  
NS 1024  
DS 4  
SWH 29761.294 Hz  
FIDRES 0.000461 Hz  
AQ 1.1010048 sec  
RG 2000  
DM 16.800 usec  
DE 0.500 usec  
TE 0 K  
D1 2.00000000 sec  
D11 0.03000000 sec  
TD 1  
SFO1 125.8131151 MHz  
NUC1 13C  
P1 9.70 usec  
PLM1 73.00000000 W  
SFO2 500.3020012 MHz  
NUC2 1H  
PCPDPRG2 waltz16  
PCPD 89.00 usec  
PLM2 15.13599968 W  
PLM3 0.23020000 W  
PLM3 0.27124000 W  
F2 - Processing parameters  
SI 32768  
SF 125.8095211 MHz  
WDW EM  
SSB 0  
LB 1.00 Hz  
GB 0  
PC 1.40

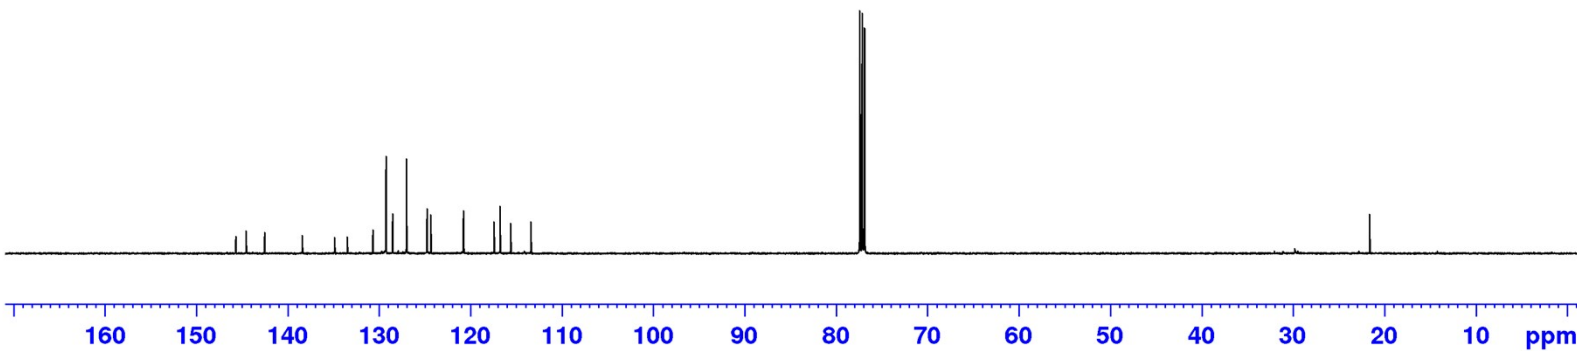

Figure S28. <sup>13</sup>C{<sup>1</sup>H} NMR spectrum of 3am in CDCl<sub>3</sub>

# Spectrum Plot Report

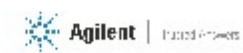

|                |          |              |                |            |              |                                 |
|----------------|----------|--------------|----------------|------------|--------------|---------------------------------|
| Name           | GM-354   | Rack Pos.    |                | Instrument | Instrument 1 | Operator                        |
| Inj. Vol. (ul) | 1        | Plate Pos.   |                | IRM Status | Success      |                                 |
| Data File      | GM-354.d | Method (Acq) | KAMAL Method.m | Comment    |              | Acq. Time (Local)               |
|                |          |              |                |            |              | 15-12-2022 11:38:52 (UTC+05:30) |

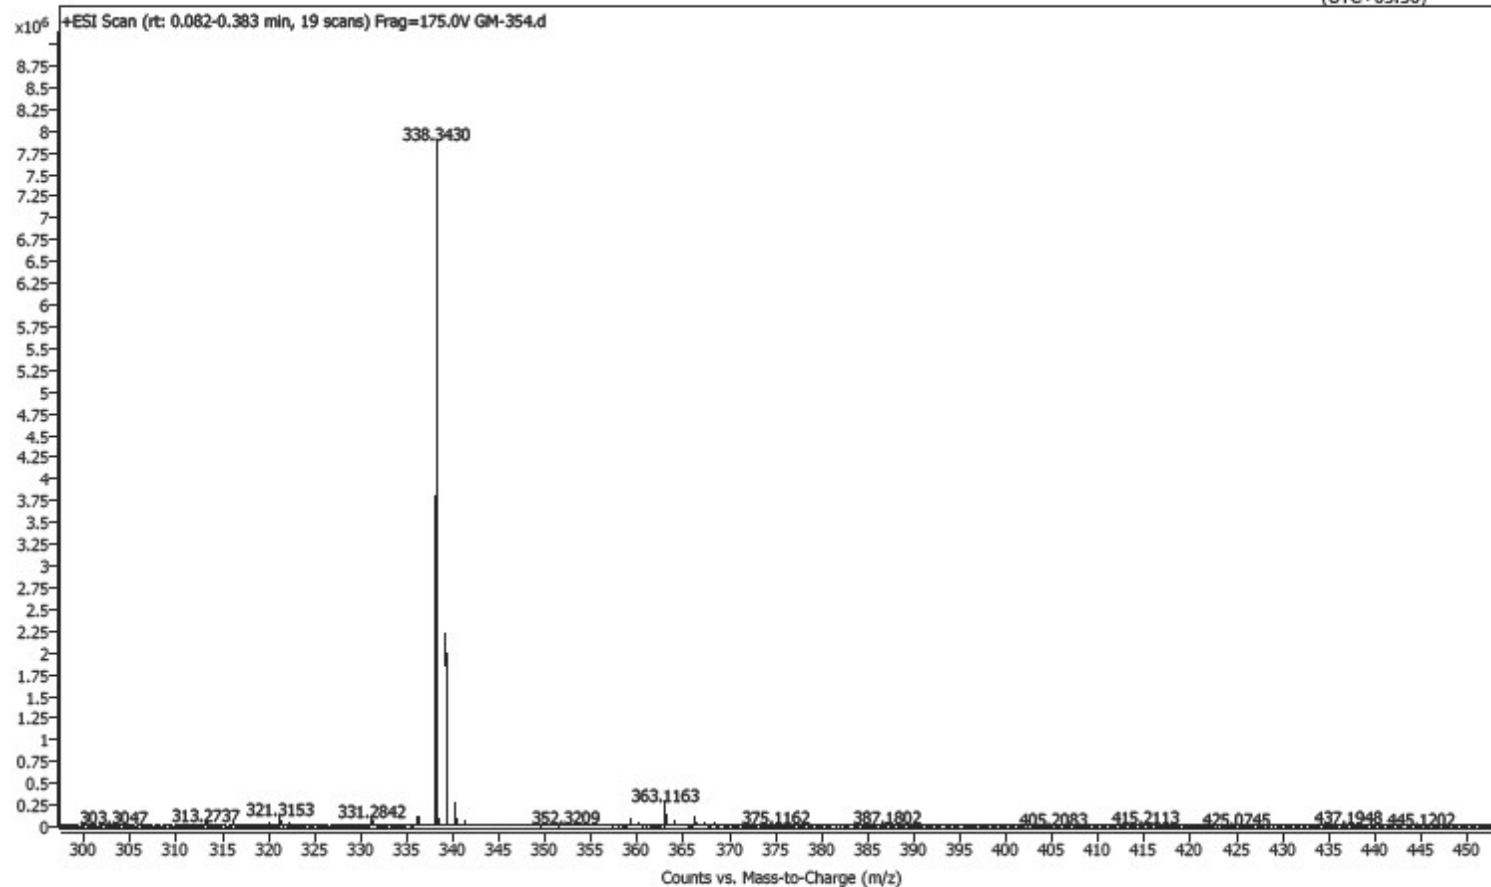

Figure S29. High Resolution Mass Spectrometry (HRMS) data of **3am**

CD-op-1-305

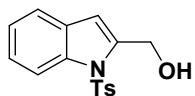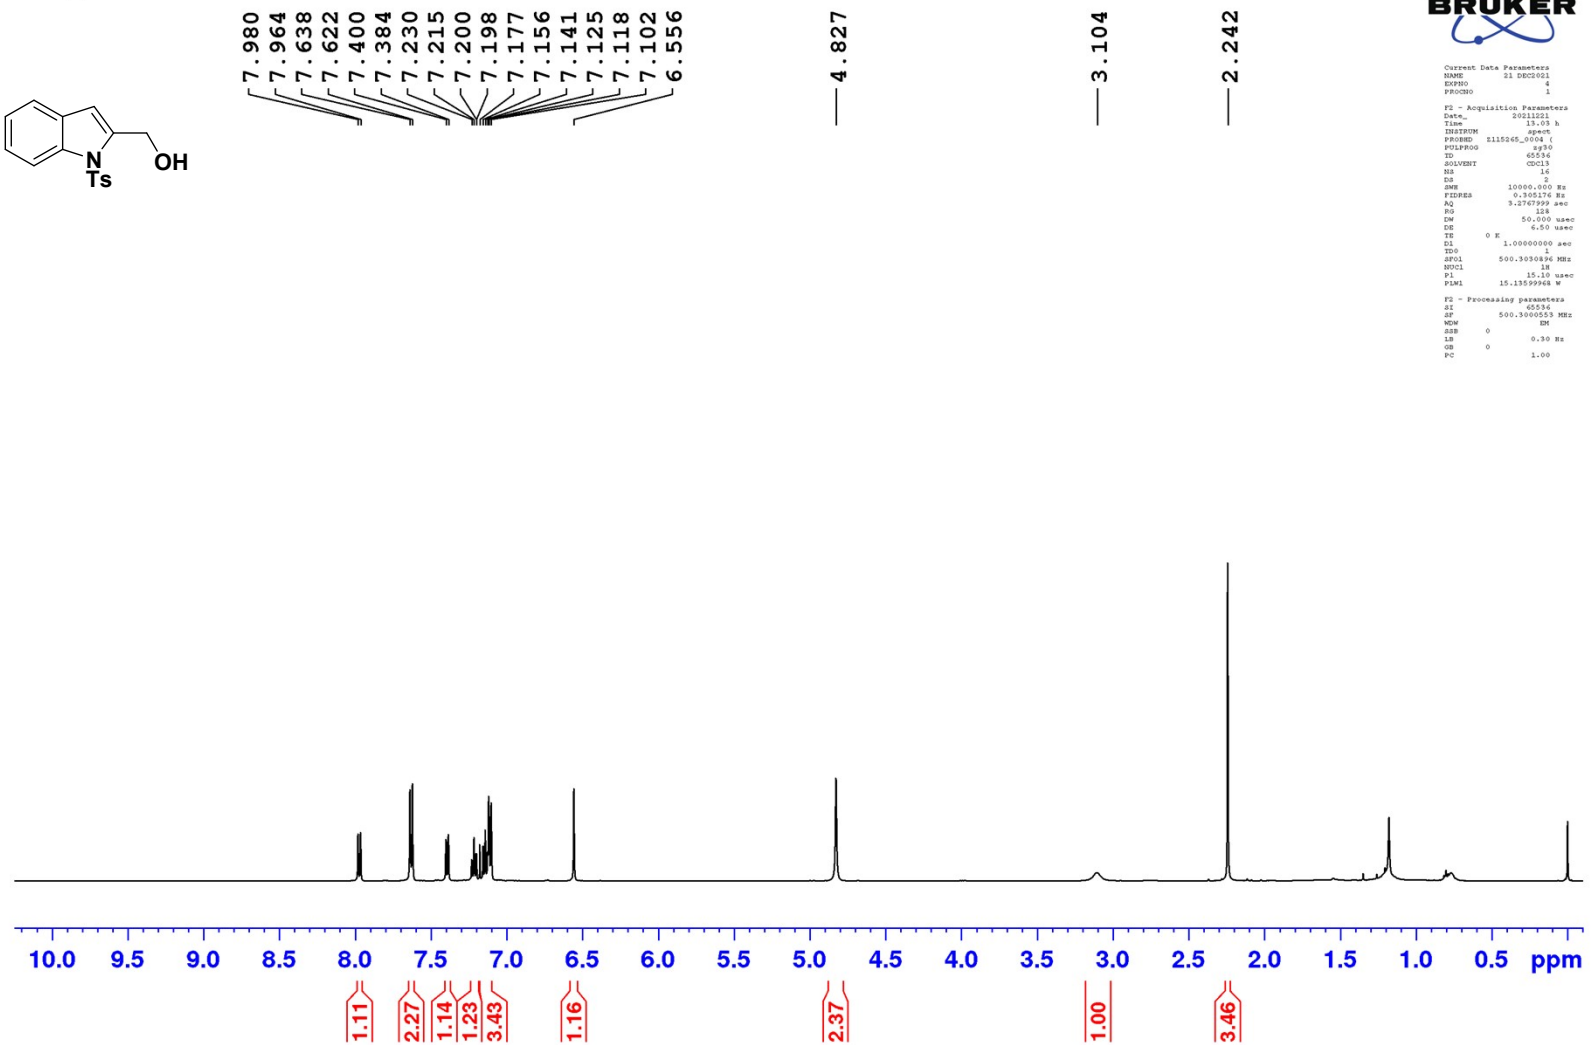

Figure S30.  $^1\text{H}$  NMR spectrum of **3an** in  $\text{CDCl}_3$

CD-OP-1-305C13

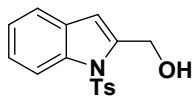

145.246  
140.328  
137.130  
135.710  
130.073  
129.219  
126.534  
125.084  
123.848  
121.292  
114.479  
111.330

77.411  
77.157  
76.903

58.689

21.653

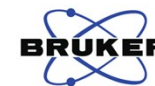

```
Current Data Parameters
NAME      D1 DDC001
EXPNO    1
PROCNO   1

F2 - Acquisition Parameters
Date_    2011021
Time     19.01 h
INSTRUM  spect
PROBHD   E115260_0004 (
PULPROG  zgpg30
TD        65536
SOLVENT  CDCl3
NS       381
DS        4
SFO1     29741.994 Hz
FIDRES   0.298261 Hz
AQ       1.1012048 sec
RG        2000
DW       16.800 usec
DE       5.50 usec
TE       0 K
D1       2.00000000 sec
D11      0.03000000 sec
TD0      1
SFO1     125.8131151 MHz
NUC1      13C
P1       9.70 usec
PL1      78.00000000 W
SFO2     500.3620012 MHz
NUC2      1H
CPDPRG2  waltz16
PCPD2    80.00 usec
PLM2     15.13559968 W
PLM3     0.23924000 W
PLM13    0.27124000 W

F2 - Processing parameters
SI       32768
SF       125.8005337 MHz
WDW      EM
SSB      0
LB       1.00 Hz
GB       0
PC       1.40
```

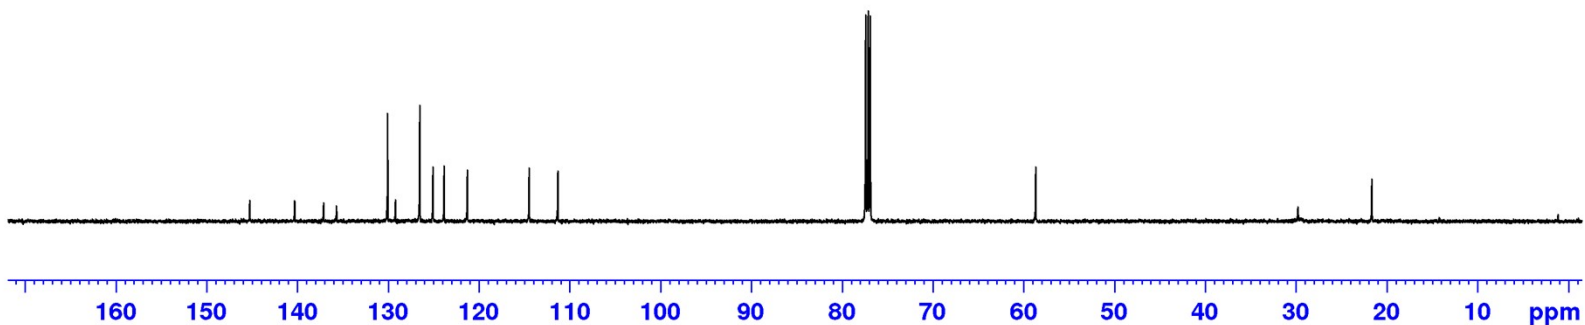

Figure S31.  $^{13}\text{C}\{^1\text{H}\}$  NMR spectrum of **3an** in  $\text{CDCl}_3$



CD-OP-1-358

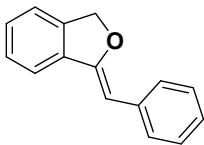

7.788  
7.772  
7.606  
7.594  
7.388  
7.373  
7.359  
7.270  
7.196  
7.181  
7.167  
— 5.984  
— 5.543

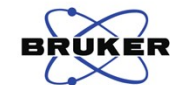

```
Current Data Parameters
NAME      Jan25-2022
EXPNO    1
PROCNO   1
F2 - Acquisition Parameters
Date_    20220225
Time     11:02 h
INSTRUM  spect
PROBHD   5110245_0004 (
PULPROG  zgpg30
ID       65536
SOLVENT  CDCl3
NS       16
DS       2
SFO      600.115 Hz
FIDRES   0.001680 Hz
AQ       4.9632597 sec
RG       101
DW       75.733 usec
DE       6.50 usec
TE       0 K
D1       1.00000000 sec
TDO      500.302745 MHz
SFO1     500.302745 MHz
NUC1      1H
P1       15.10 usec
PL1      15.1359968 M
F2 - Processing parameters
SI       65536
SF       500.300194 MHz
WDW      EM
SSB      0
LB       0.10 Hz
GB       0
PC       1.00
```

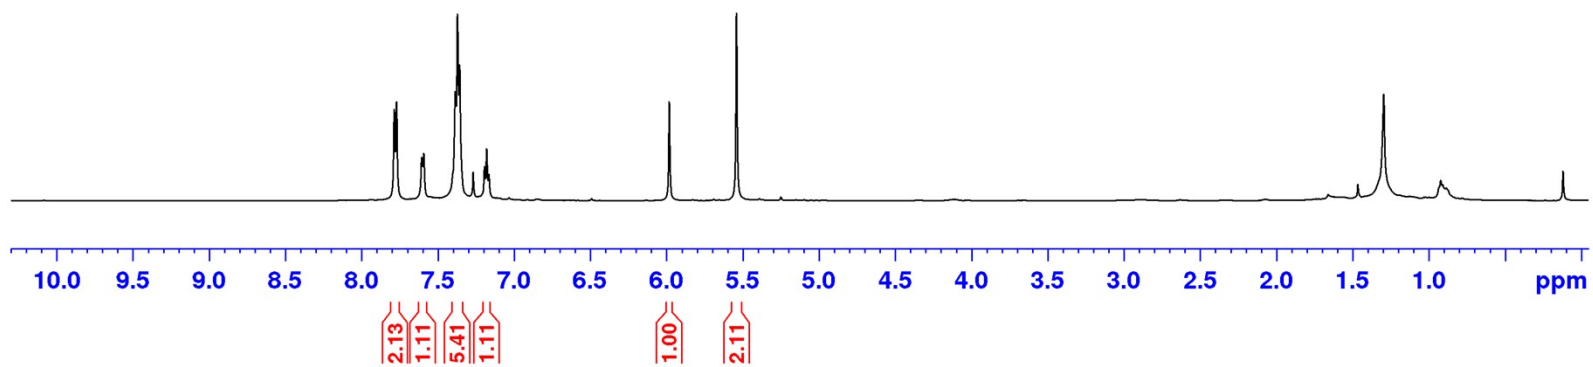

Figure S32. <sup>1</sup>H NMR spectrum of **4aa** in CDCl<sub>3</sub>

CD-OP-1-358-C13

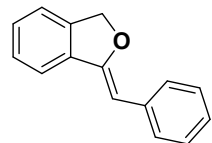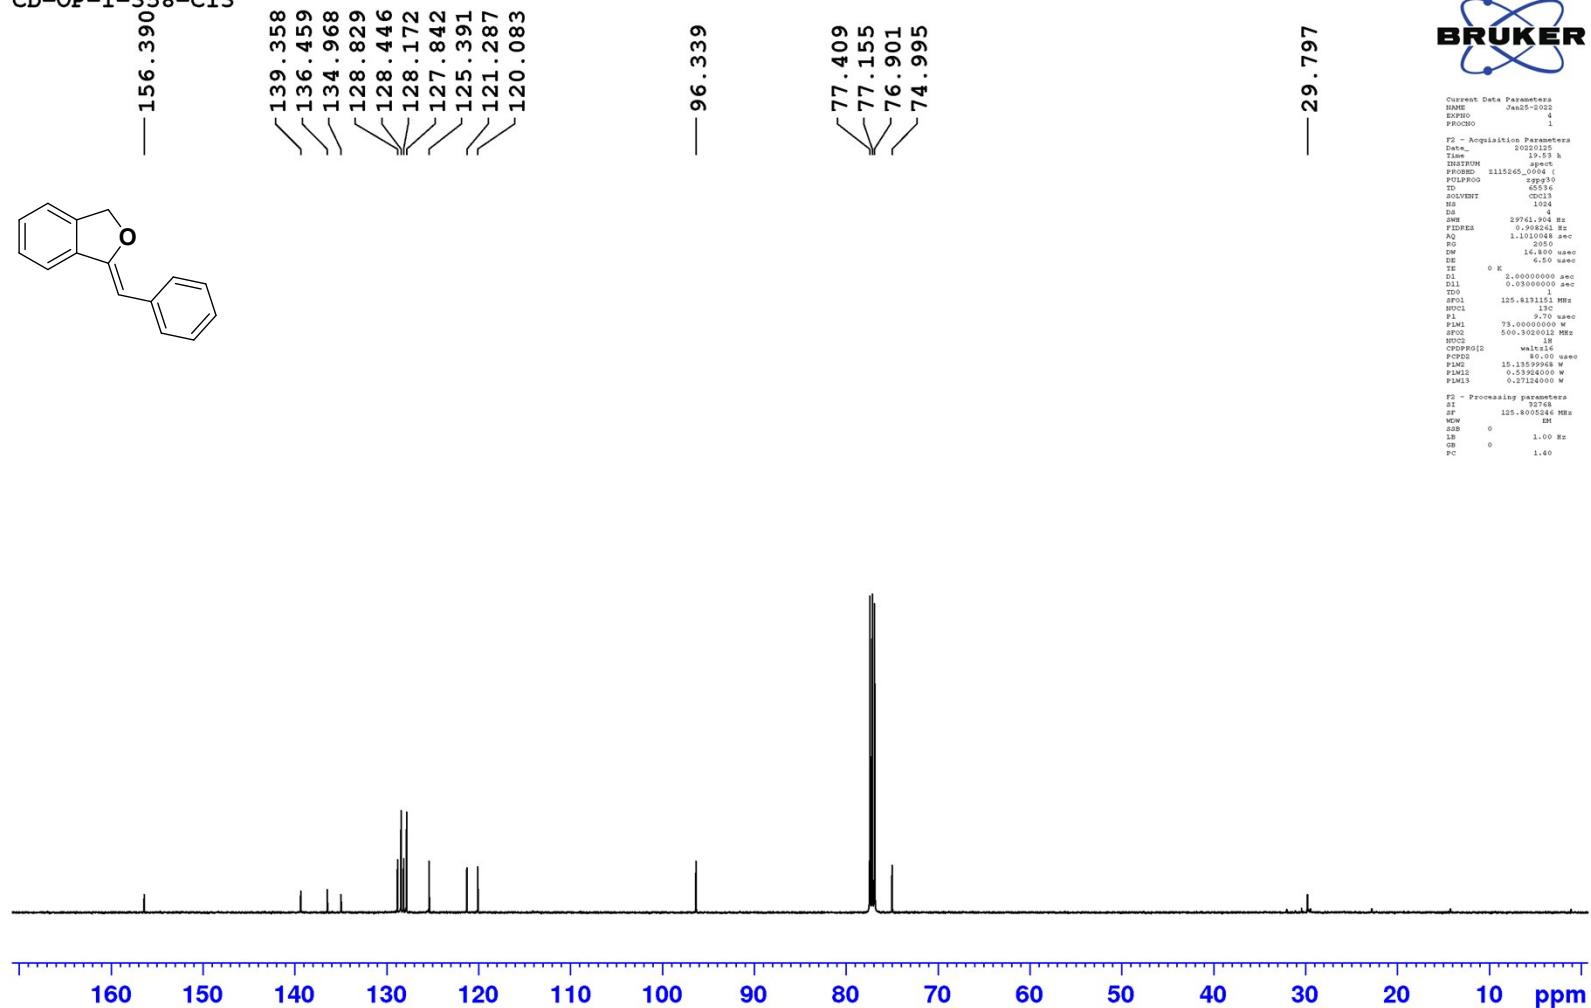

Figure S33.  $^{13}\text{C}\{^1\text{H}\}$  NMR spectrum of **4aa** in  $\text{CDCl}_3$

CD-OP-1-375-1H

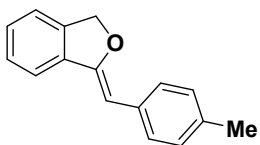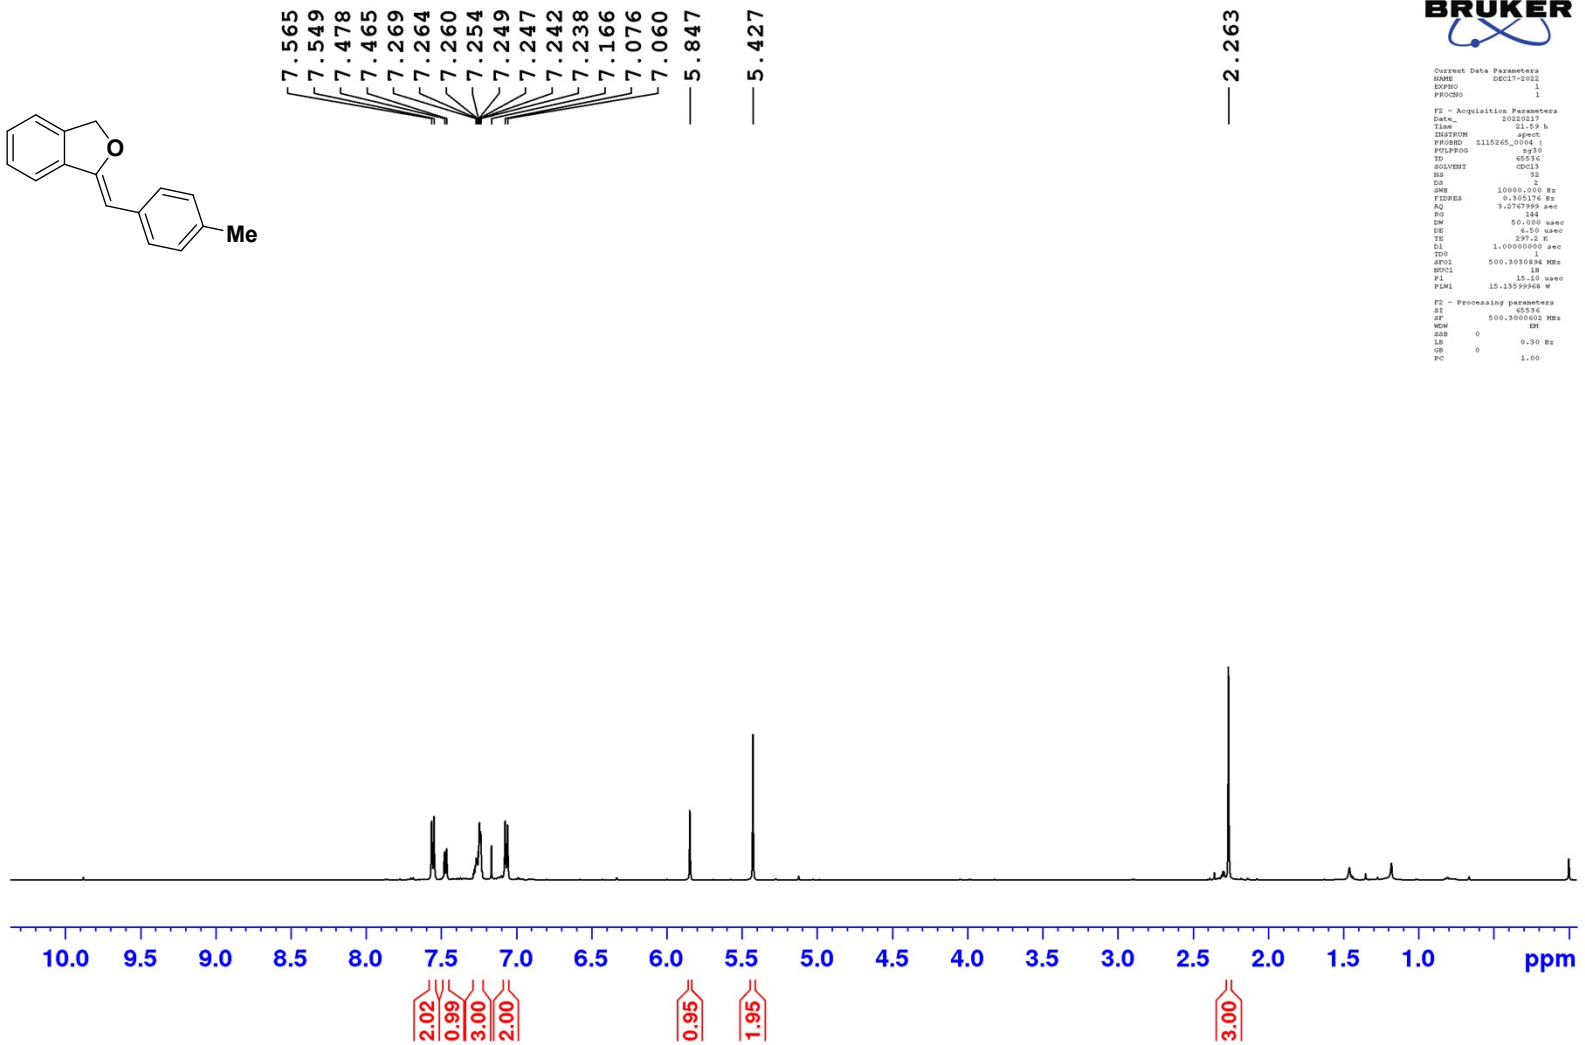

Figure S34. <sup>1</sup>H NMR spectrum of 4ab in CDCl<sub>3</sub>

CD-OP-1-375-13C

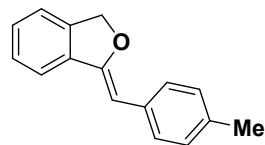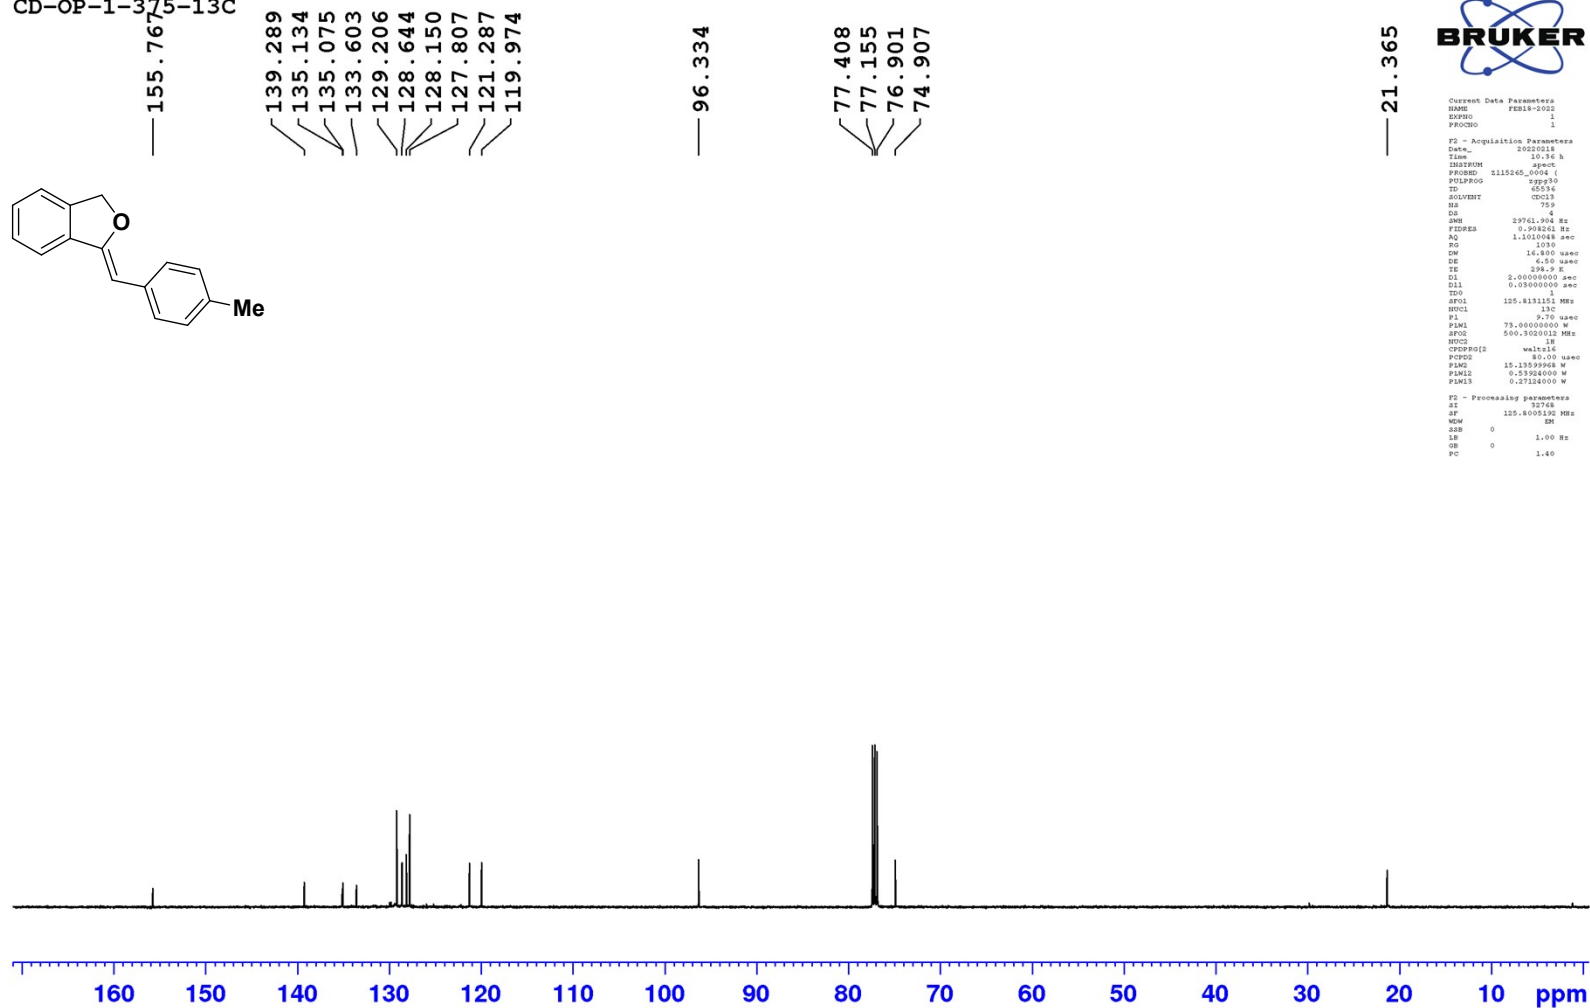

Figure S35.  $^{13}\text{C}\{^1\text{H}\}$  NMR spectrum of **4ab** in  $\text{CDCl}_3$

CD-OP-1-376-1H

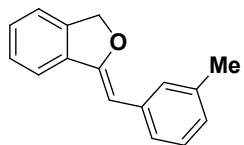

7.482  
7.463  
7.458  
7.451  
7.447  
7.261  
7.247  
7.240  
7.231  
7.228  
7.223  
7.217  
7.204  
7.154  
7.139  
7.123  
6.887  
6.872  
5.825  
5.403

2.282

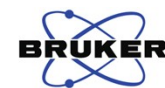

```
Current Data Parameters
NAME      FEB14-2022
EXPNO    7
PROCNO   1

F2 - Acquisition Parameters
Date_    20220218
Time     20:11:5
INSTRUM  spect
PROBHD   1H5005_004 1
PULPROG  zgpg30
TD        65536
SOLVENT  CDCl3
NS       16
DS       2
SWH       10000.000 Hz
FIDRES   0.305176 Hz
AQ        3.274799 sec
RG        64
RW        50.000 nsec
DE        6.50 nsec
TE        296.2 K
D1        1.00000000 sec
D2        1
SFO1     500.3030894 MHz
SFO2     18
SFO3     15.10000000 MHz
P1        15.10 nsec
PL1      15.10000000 W

F2 - Processing parameters
SI        65536
SF        500.300014 MHz
WDW       EM
SSB       0
LB        0.30 Hz
GB        0
PC        1.00
```

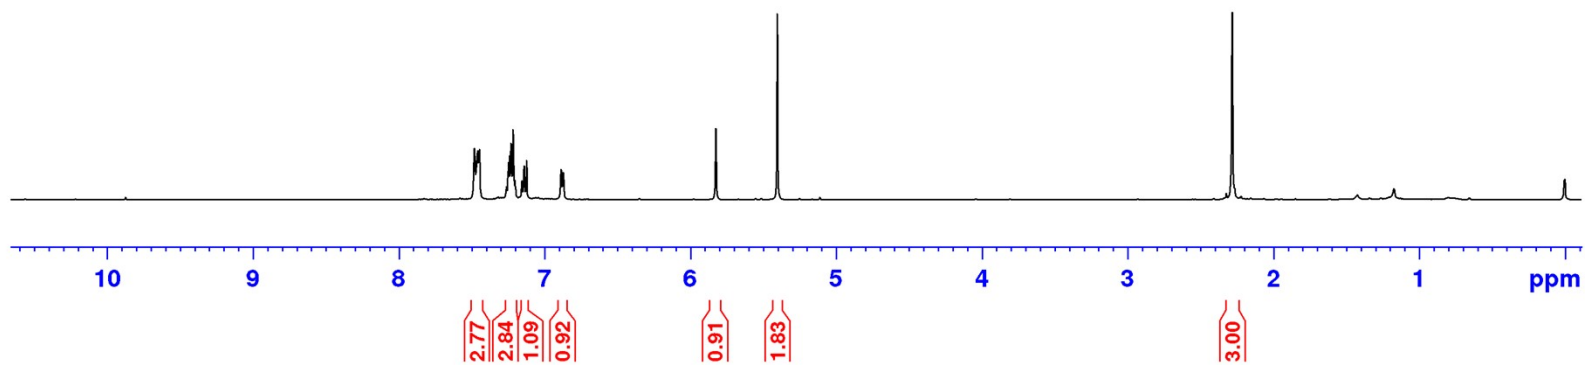

Figure S36. <sup>1</sup>H NMR spectrum of **4ac** in CDCl<sub>3</sub>

CD-OP-1-376-13C

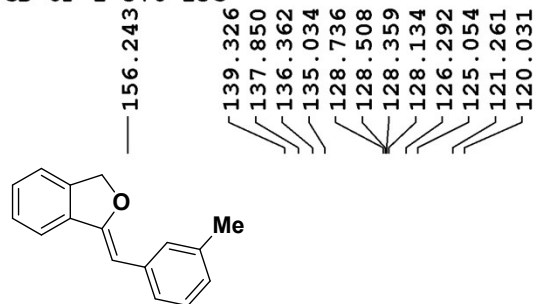

96.420

77.411  
77.157  
76.903  
74.949

21.699

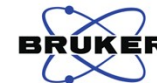

```
Current Data Parameters
NAME      FE18-2022
EXPNO    4
PROCNO   1
F2 - Acquisition Parameters
Date_    20220218
Time     21:03 h
INSTRUM  spect
PROBHD   E115245_0904 (
PULPROG  zgpg30
TD        65536
SOLVENT  CDCl3
NS        832
DS        4
SWH       29761.904 Hz
FIDRES    0.903601 Hz
AQ         1.1010048 sec
RG         3200
DE         16.800 usec
TE         300.2 K
DQ         6.00 usec
DE         297.9 Hz
DIL        1.00000000 sec
D11        0.03000000 sec
D12        1
D13        1
AF01      125.813151 MHz
NUC1       13C
P1         9.70 usec
PL1        71.00000000 W
RF12       500.3020151 MHz
NUC2
PCPPROG2  waltz16
PCPD2     80.00 usec
PLPG      15.1359968 W
PLM15     0.5324000 W
PLM13     0.2118000 W
F2 - Processing parameters
SI         32768
SF         125.8100521 MHz
WDW        EM
SSB         0
LB          1.00 Hz
GB          0
PC          1.40
```

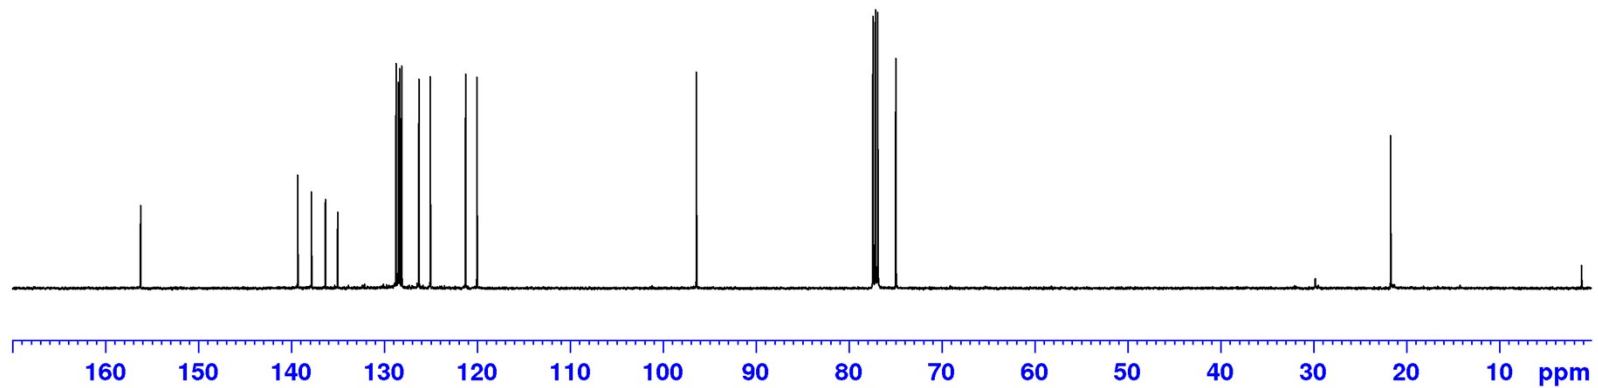

Figure S37.  $^{13}\text{C}\{^1\text{H}\}$  NMR spectrum of **4ac** in  $\text{CDCl}_3$

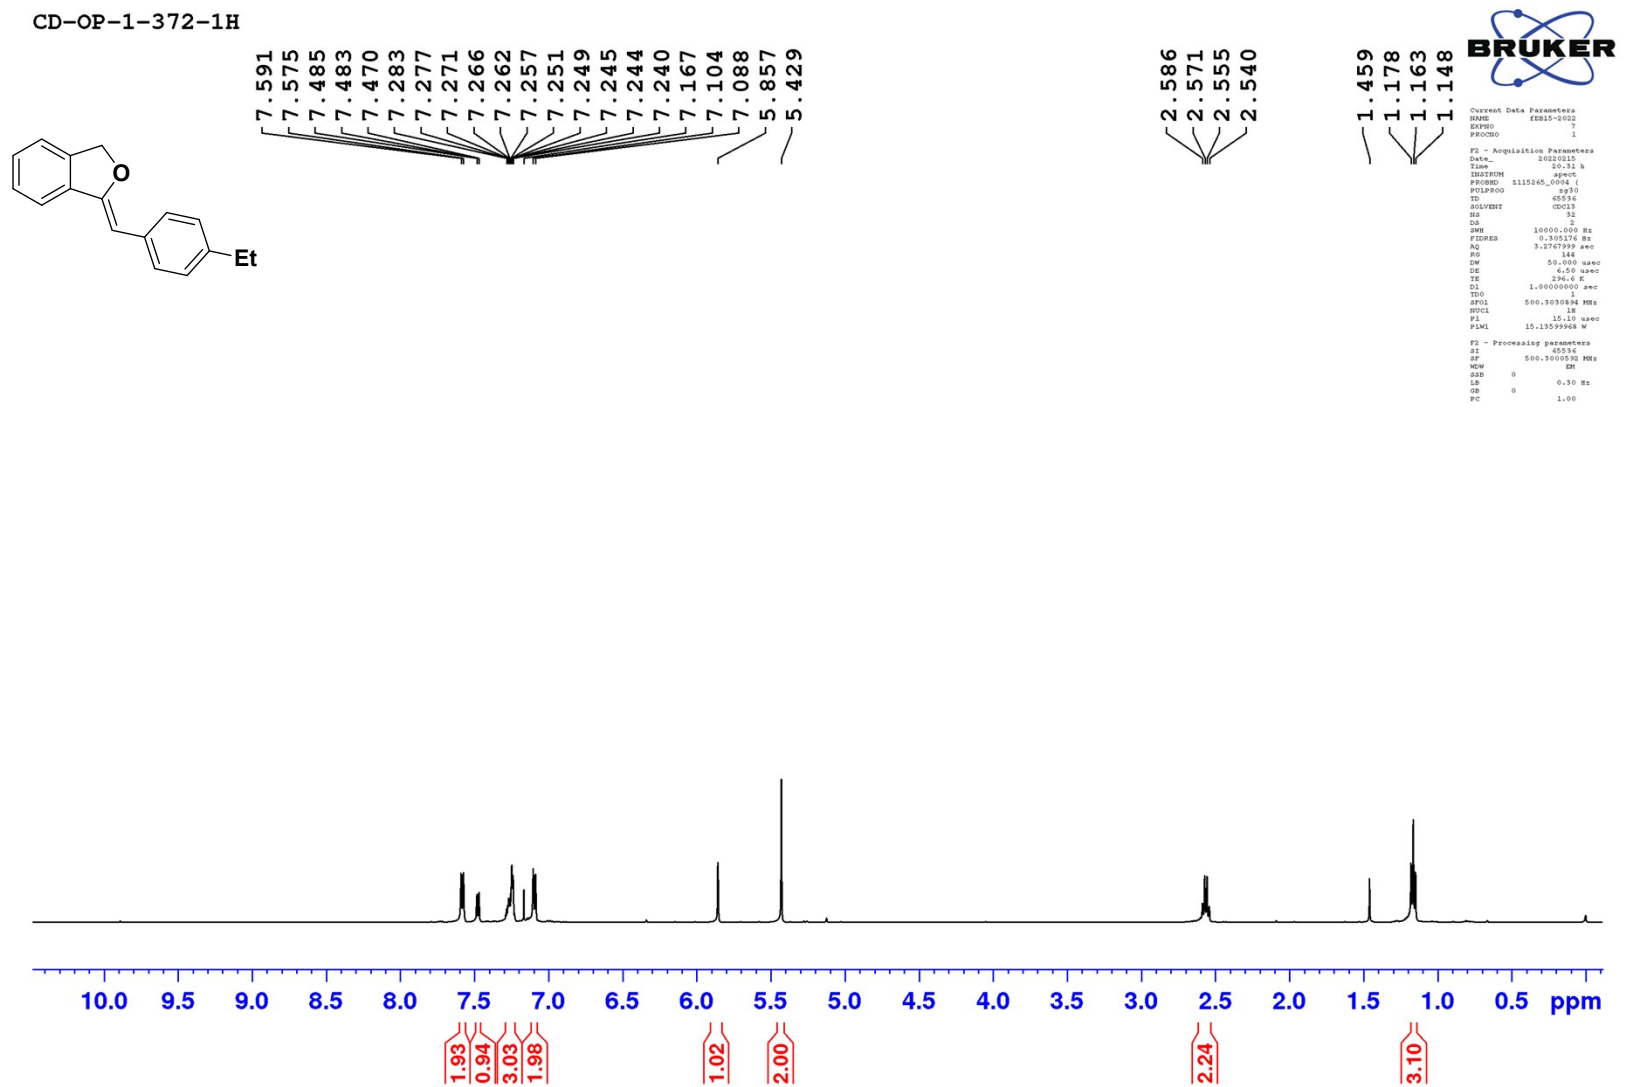

Figure S38. <sup>1</sup>H NMR spectrum of 4ad in CDCl<sub>3</sub>

CD-OP-1-372-13C

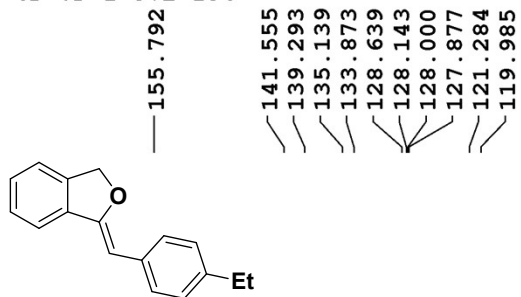

96.344

77.409  
77.155  
76.901  
74.897

28.791

15.760

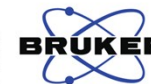

```
Current Data Parameters
NAME      FEB15-2022
EXPNO    1
PROCNO   1

F2 - Acquisition Parameters
Date_    20220215
Time     21:26 h
INSTRUM  spect
PROBHD   E115265_0904 (
PULPROG  zgpg30
TD       65536
SOLVENT  CDCl3
NS       2048
DS       4
SWH      29761.904 Hz
FIDRES   0.368248 Hz
AQ       1.1012084 sec
RG       3000
DN       16.800 usec
DE       4.00 usec
TE       298.2 K
D1       2.00000000 sec
d11      0.03000000 sec
TD0      1
SFO1     125.813151 MHz
HPC1     130
PI       9.70 usec
P1L1     73.00000000 W
SFO2     500.3020012 MHz
HPC2     18
CPDPRG2  waltz16
PCPD2    81.00 usec
PLM2     15.13599948 W
PLM3     0.53964000 W
PLM13    0.27124000 W

F2 - Processing parameters
SI       32768
SF       125.8005301 MHz
MSB      0
SGB      0
SGB      0
GB       0
PC       1.60
```

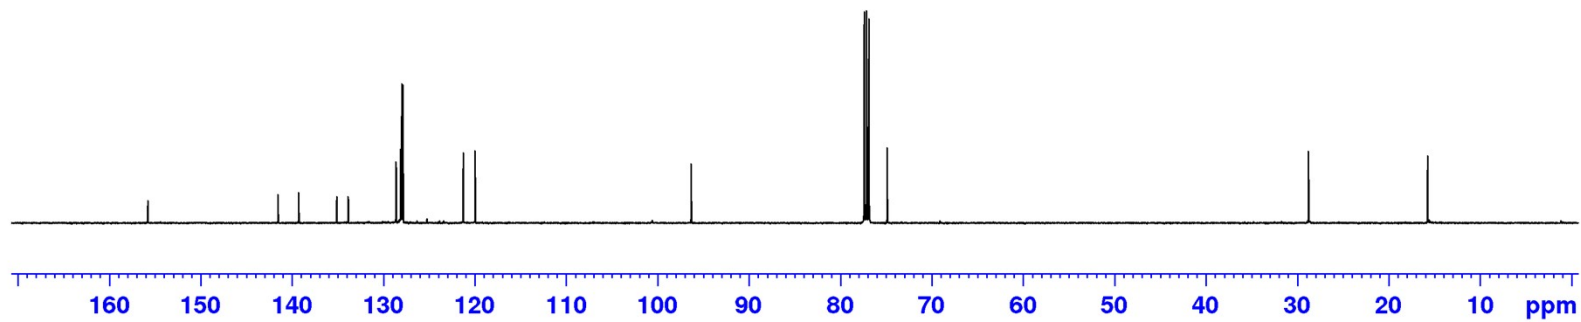

Figure S39.  $^{13}\text{C}\{^1\text{H}\}$  NMR spectrum of **4ad** in  $\text{CDCl}_3$



CD-OP-1-370-1H

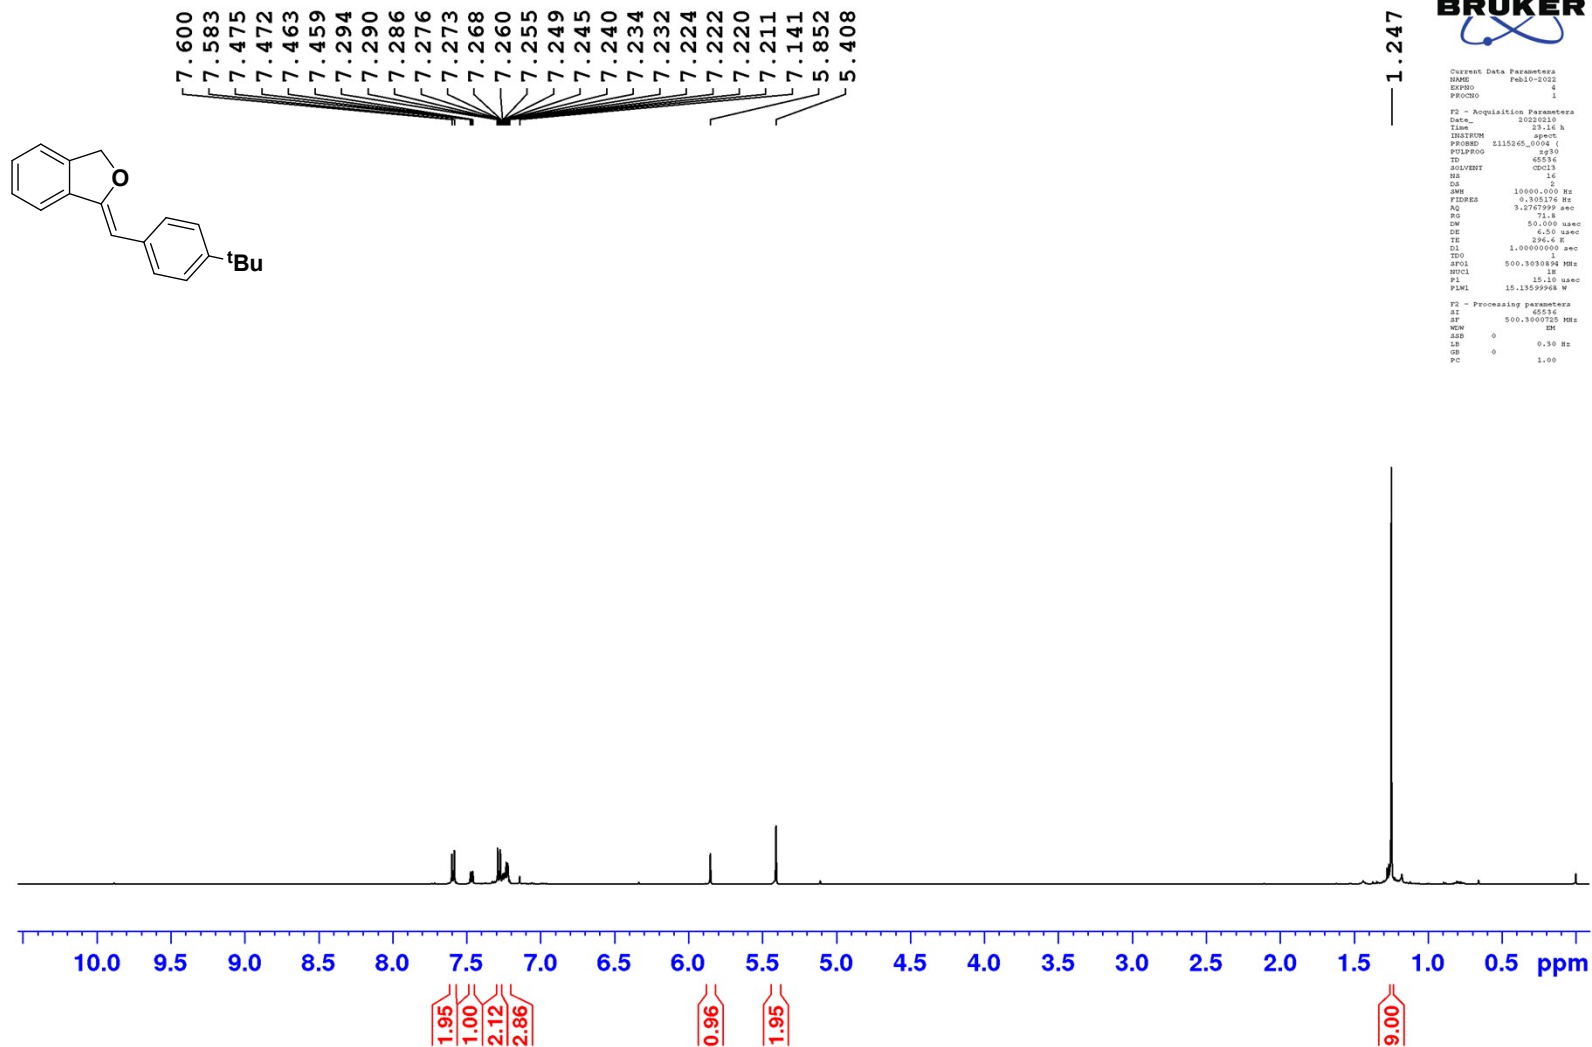

Figure S40. <sup>1</sup>H NMR spectrum of 4ae in CDCl<sub>3</sub>

CD-OP-1-370-13C

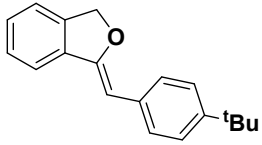

155.911

148.352

139.313

135.127

133.645

128.636

128.130

127.607

125.378

121.278

120.004

96.194

77.412

77.158

76.904

74.875

34.609

31.491

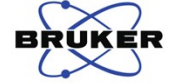

```
Current Data Parameters
NAME      Fabio-2022
EXPNO    1
PROCNO   1

F2 - Acquisition Parameters
Date_    20220211
Time     1:13 h
INSTRUM  spect
PROBHD   E115265_6004 (
PULPROG  zgpg30
TD        65556
SOLVENT  CDCl3
NS        2048
DS        4
SWH       20761.994 Hz
FIDRES    0.998241 Hz
AQ         1.1018048 sec
RG         3200
DW         16.800 usec
DE         6.600 usec
TE         298.2 K
D1         2.00000000 sec
D11        0.03000000 sec
TD0        1
SFO1      125.811151 MHz
NUC1       13C
P1         9.70 usec
PLM1       73.00000000 W
SFO2      500.3020913 MHz
NUC2       1H
CPDPRG2   waltz16
PCPD2      90.00 usec
PLM2       15.13599968 W
PLM3       0.53984000 W
PLM33      0.27124000 W

F2 - Processing parameters
SI         32768
SF         125.8095228 MHz
WDW        EM
SSB        0
LB         1.00 Hz
GB         0
PC         1.40
```

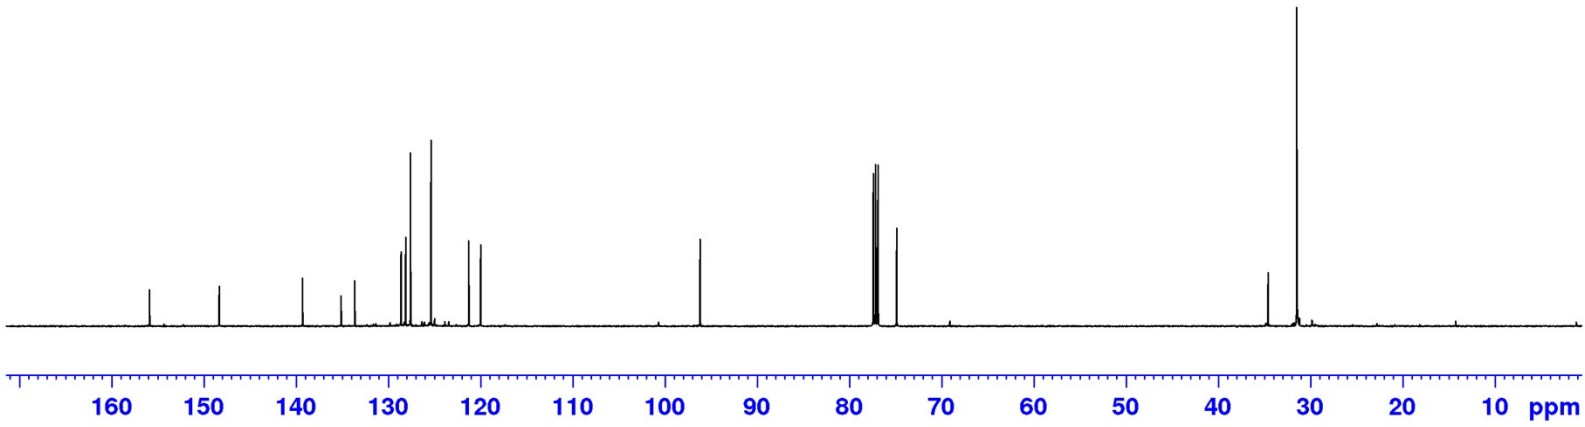

Figure S41.  $^{13}\text{C}\{^1\text{H}\}$  NMR spectrum of 4ae in  $\text{CDCl}_3$

# Spectrum Plot Report

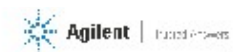

|                |          |              |                |            |              |                                    |
|----------------|----------|--------------|----------------|------------|--------------|------------------------------------|
| Name           | GM-370   | Rack Pos.    |                | Instrument | Instrument 1 | Operator                           |
| Inj. Vol. (ul) | 1        | Plate Pos.   |                | IRM Status | Success      |                                    |
| Data File      | GM-370.d | Method (Acq) | KAMAL Method.m | Comment    |              | Acq. Time (Local)                  |
|                |          |              |                |            |              | 15-12-2022 11:34:19<br>(UTC+05:30) |

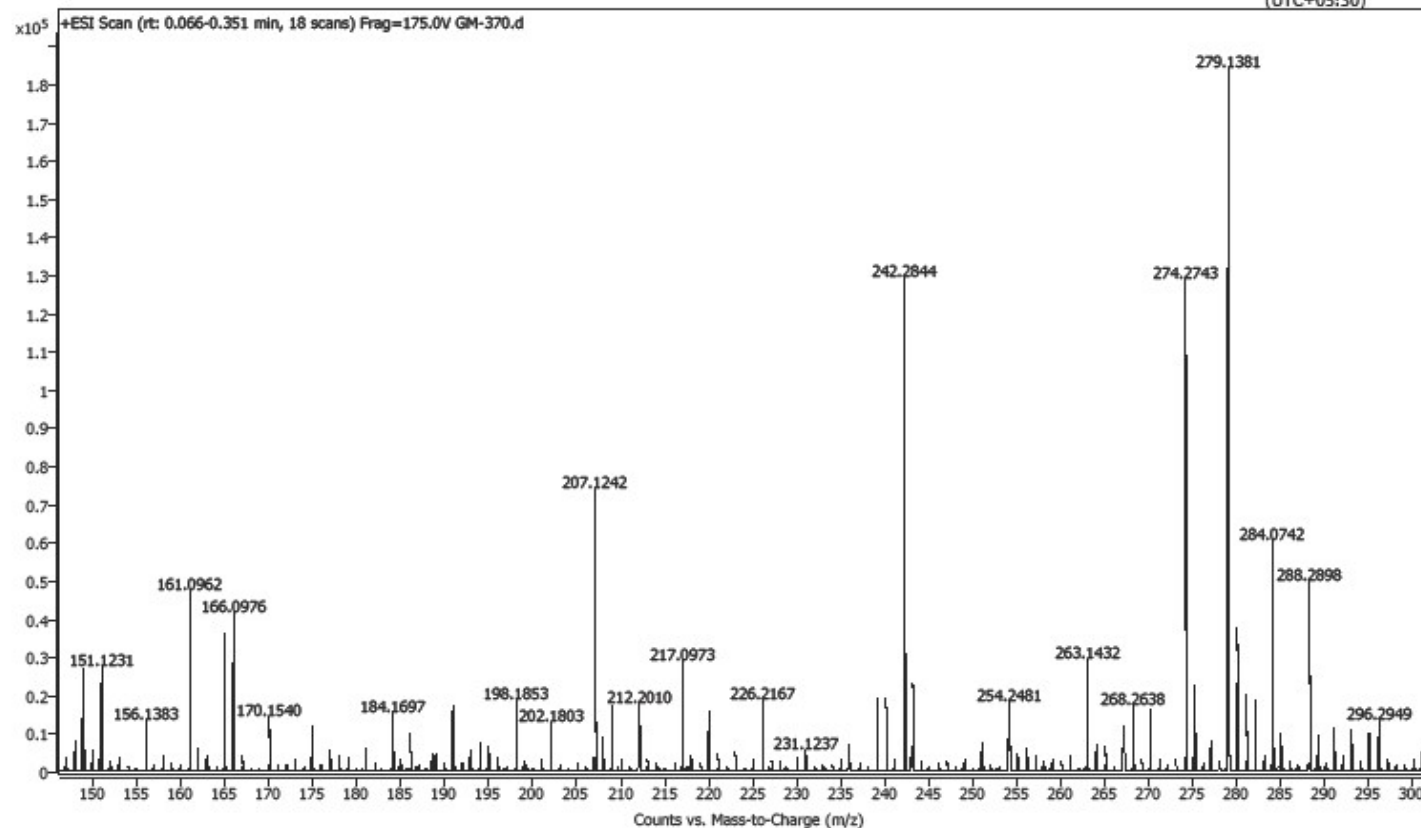

Figure S42. High Resolution Mass Spectrometry (HRMS) data of **4ae**

CD-OP-1-366-1H

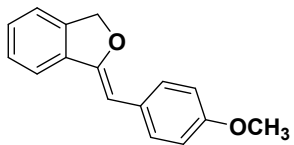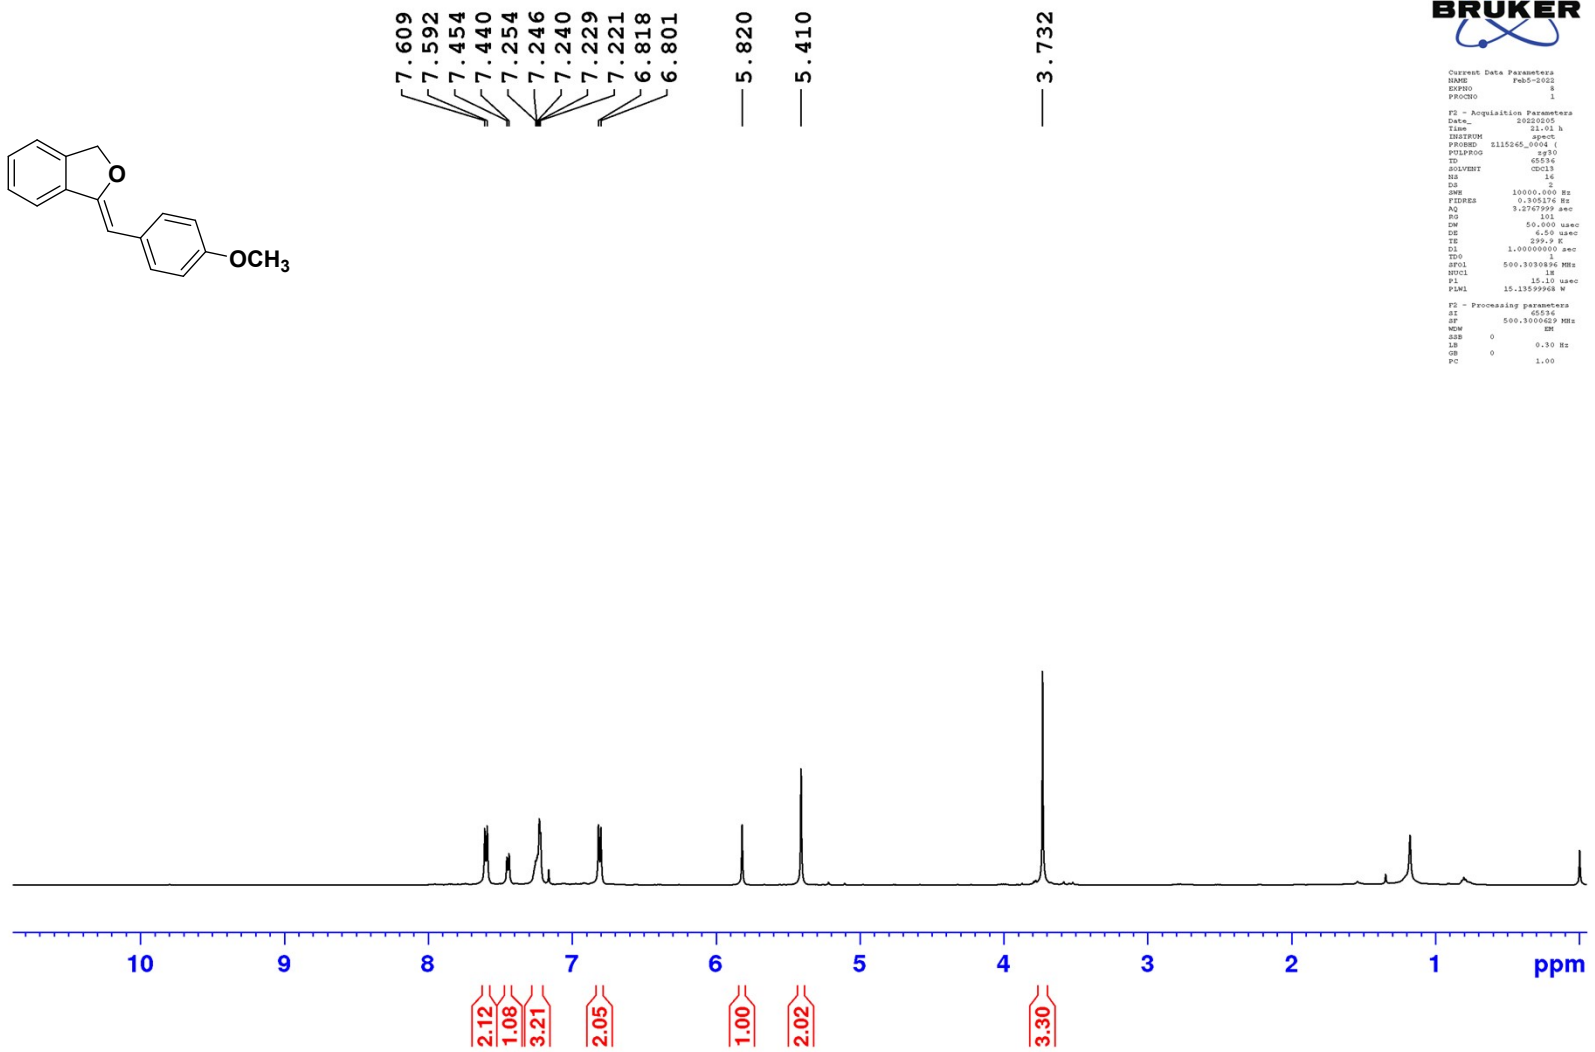

Figure S43.  $^1\text{H}$  NMR spectrum of **4af** in  $\text{CDCl}_3$

CD-OP-1-366-13C

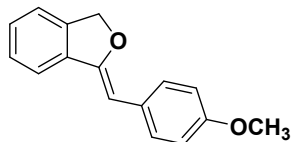

157.566  
154.879

139.082  
135.147  
129.333  
129.059  
128.455  
128.111  
121.259  
119.781  
114.011

95.936

77.413  
77.158  
76.904  
74.790

55.396

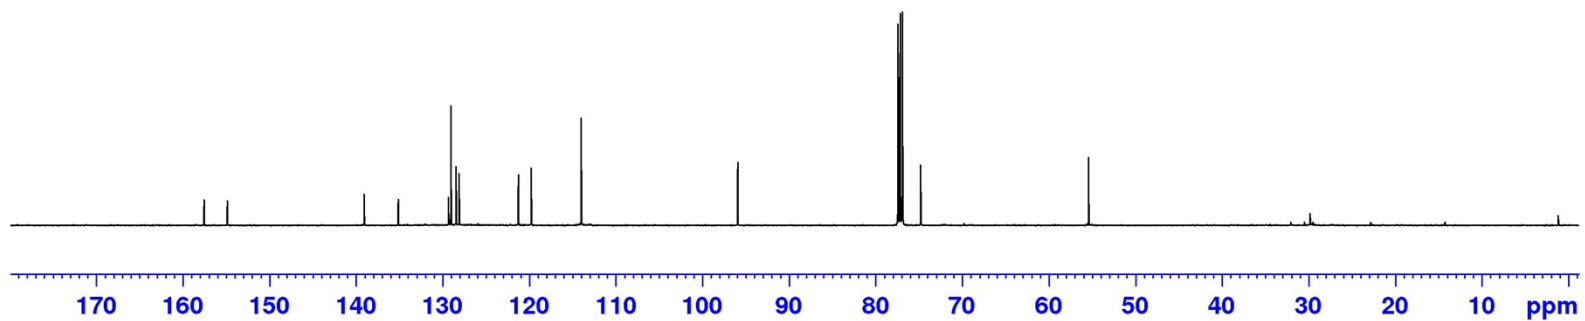

Figure S44.  $^{13}\text{C}\{^1\text{H}\}$  NMR spectrum of **4af** in  $\text{CDCl}_3$

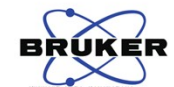

```
=====
Userfile Data Parameters
NAME      Feb 5 2022  9
EXPNO    2
PROCNO   1

F2 - Acquisition Parameters
Date_    20220204
Time     01:40 h
INSTRUM  spect
PROBHD   1H5MMQ_0004 (
PULPROG  zgpg30
TE       300.2
SOLVENT  CDCl3
NS       4000
DS       4
SWH      29761.904 Hz
FIDRES   0.904241 Hz
AQ       1.101048 sec
RG       1030
DW       16.800 usec
DE       6.50 usec
TE       303.14 K
D1       2.00000000 sec
D11      0.08000000 sec
TD       65536
SFO1     125.811115 MHz
NUC1     13C
P1       130
PC1      9.70 usec
PL1      78.00000000 W
SFO2     500.1328012 MHz
NUC2     1H
PCPD2    80.00 usec
PL2      15.1859968 W
PL12     0.53924000 W
PL13     0.27124000 W

F2 - Processing parameters
SI       32768
SF       125.800528 MHz
WDW      EM
SSB      0
LB       1.00 Hz
GB       0
PC       1.40
```

Compound Spectra

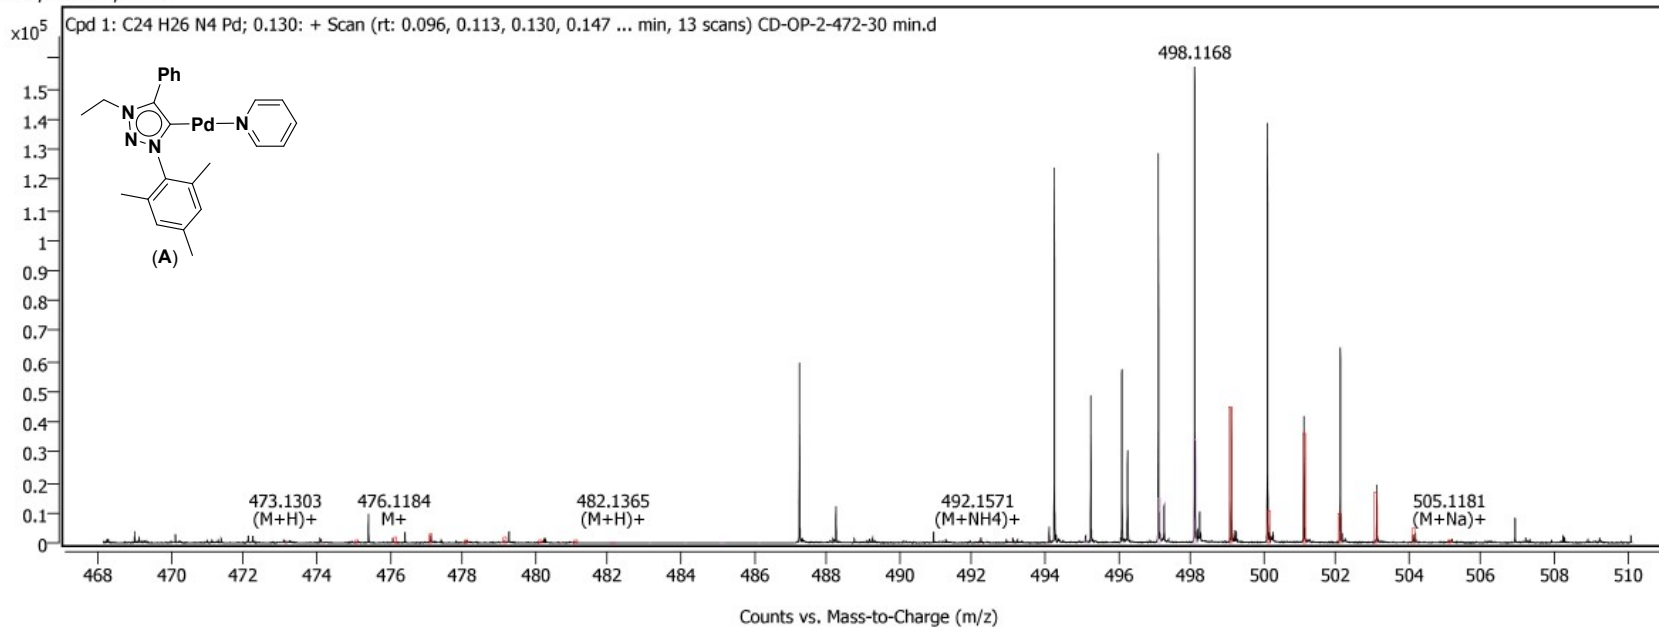

Spectrum Peaks

| m/z      | Z | Abund  | Diff (ppm) | Height % | Height % (Calc) | Ion Species                       | Formula                                           |
|----------|---|--------|------------|----------|-----------------|-----------------------------------|---------------------------------------------------|
| 473.1303 | 1 | 418    | 3.45       | 16.11    | 3.01            | (M+H) <sup>+</sup>                | C <sub>24</sub> H <sub>26</sub> N <sub>4</sub> Pd |
| 475.1301 | 1 | 248    | 6.41       | 9.55     | 32.94           | (M+H) <sup>+</sup>                | C <sub>24</sub> H <sub>26</sub> N <sub>4</sub> Pd |
| 476.1184 | 1 | 249    | -2.45      | 100.00   | 100.00          | M <sup>+</sup>                    | C <sub>24</sub> H <sub>26</sub> N <sub>4</sub> Pd |
| 477.1257 | 1 | 2594   | -3.73      | 100.00   | 100.00          | (M+H) <sup>+</sup>                | C <sub>24</sub> H <sub>26</sub> N <sub>4</sub> Pd |
| 482.1365 | 1 | 157    | 10.77      | 6.06     | 9.82            | (M+H) <sup>+</sup>                | C <sub>24</sub> H <sub>26</sub> N <sub>4</sub> Pd |
| 492.1571 | 1 | 167    | 6.94       | 48.66    | 32.84           | (M+NH <sub>4</sub> ) <sup>+</sup> | C <sub>24</sub> H <sub>26</sub> N <sub>4</sub> Pd |
| 494.1466 | 1 | 343    | -14.91     | 100.00   | 100.00          | (M+NH <sub>4</sub> ) <sup>+</sup> | C <sub>24</sub> H <sub>26</sub> N <sub>4</sub> Pd |
| 499.1196 | 1 | 44955  | 20.50      | 100.00   | 100.00          | (M+Na) <sup>+</sup>               | C <sub>24</sub> H <sub>26</sub> N <sub>4</sub> Pd |
| 505.1181 | 1 | 763    | 3.61       | 1.70     | 1.29            | (M+Na) <sup>+</sup>               | C <sub>24</sub> H <sub>26</sub> N <sub>4</sub> Pd |
| 498.1168 |   | 158250 |            |          |                 |                                   |                                                   |

Figure S45. High Resolution Mass Spectrometry (HRMS) data of Intermediate A

Compound Spectra (overlaid)

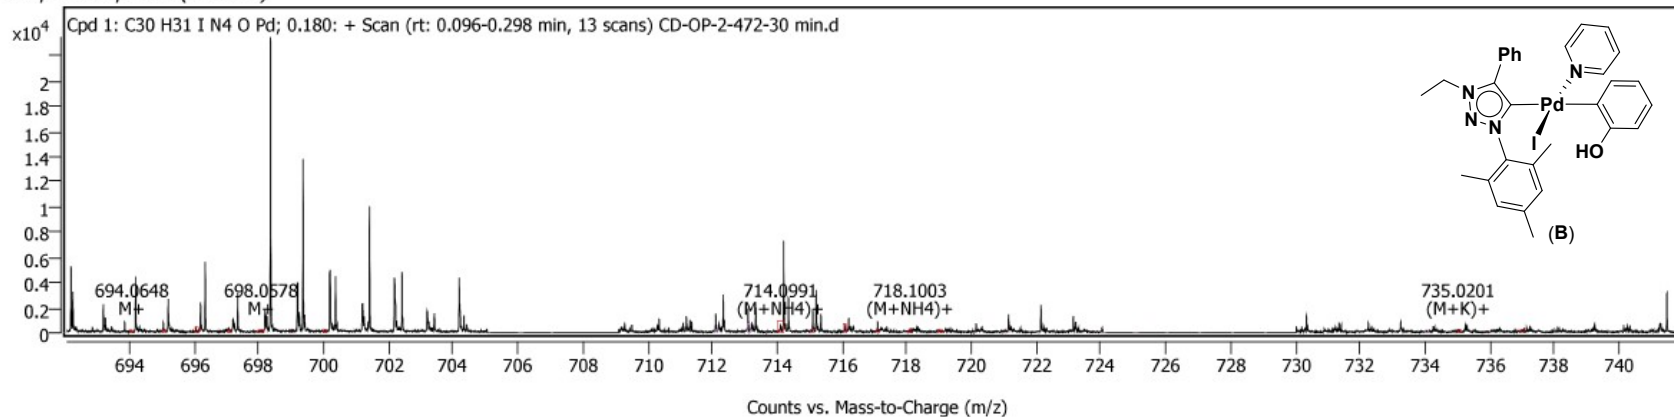

Spectrum Peaks

| m/z      | Z | Abund | Diff (ppm) | Height % | Height % (Calc) | Ion Species                       | Formula                                               |
|----------|---|-------|------------|----------|-----------------|-----------------------------------|-------------------------------------------------------|
| 694.0648 | 1 | 135   | 10.11      | 32.44    | 31.42           | M+                                | C <sub>30</sub> H <sub>31</sub> I N <sub>4</sub> O Pd |
| 695.0669 | 1 | 331   | 11.21      | 79.74    | 73.38           | M+                                | C <sub>30</sub> H <sub>31</sub> I N <sub>4</sub> O Pd |
| 696.0511 | 1 | 415   | -10.38     | 100.00   | 100.00          | M+                                | C <sub>30</sub> H <sub>31</sub> I N <sub>4</sub> O Pd |
| 698.0578 | 1 | 225   | -0.22      | 54.34    | 79.20           | M+                                | C <sub>30</sub> H <sub>31</sub> I N <sub>4</sub> O Pd |
| 699.0613 | 1 | 134   | 0.66       | 32.35    | 26.02           | M+                                | C <sub>30</sub> H <sub>31</sub> I N <sub>4</sub> O Pd |
| 700.0534 | 1 | 157   | -8.61      | 37.95    | 37.31           | M+                                | C <sub>30</sub> H <sub>31</sub> I N <sub>4</sub> O Pd |
| 714.0991 | 1 | 718   | 9.01       | 98.60    | 100.00          | (M+NH <sub>4</sub> ) <sup>+</sup> | C <sub>30</sub> H <sub>31</sub> I N <sub>4</sub> O Pd |
| 716.0991 | 1 | 728   | 9.37       | 100.00   | 79.09           | (M+NH <sub>4</sub> ) <sup>+</sup> | C <sub>30</sub> H <sub>31</sub> I N <sub>4</sub> O Pd |
| 718.1003 | 1 | 366   | 8.99       | 50.22    | 37.31           | (M+NH <sub>4</sub> ) <sup>+</sup> | C <sub>30</sub> H <sub>31</sub> I N <sub>4</sub> O Pd |
| 719.0553 | 1 | 129   | 9.96       | 100.00   | 100.00          | (M+Na) <sup>+</sup>               | C <sub>30</sub> H <sub>31</sub> I N <sub>4</sub> O Pd |
| 719.1026 | 1 | 135   | 8.53       | 18.48    | 11.91           | (M+NH <sub>4</sub> ) <sup>+</sup> | C <sub>30</sub> H <sub>31</sub> I N <sub>4</sub> O Pd |
| 735.0201 | 1 | 266   | -2.49      | 100.00   | 100.00          | (M+K) <sup>+</sup>                | C <sub>30</sub> H <sub>31</sub> I N <sub>4</sub> O Pd |
| 737.0221 | 1 | 162   | 0.71       | 60.64    | 84.50           | (M+K) <sup>+</sup>                | C <sub>30</sub> H <sub>31</sub> I N <sub>4</sub> O Pd |

Figure S46. High Resolution Mass Spectrometry (HRMS) data of Intermediate B

Compound Spectra

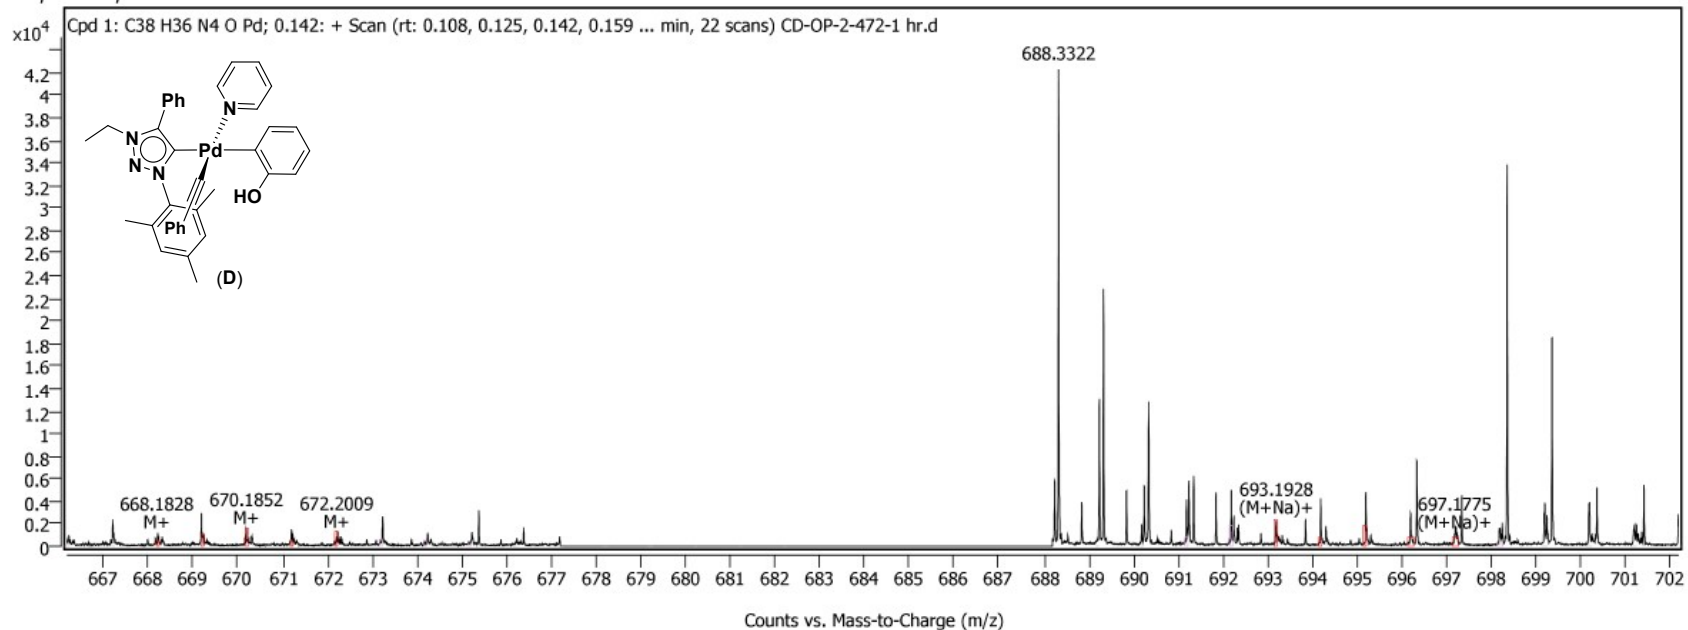

Spectrum Peaks

| m/z      | Z | Abund | Diff (ppm) | Height % | Height % (Calc) | Ion Species | Formula                                            |
|----------|---|-------|------------|----------|-----------------|-------------|----------------------------------------------------|
| 668.1828 | 1 | 333   | -14.49     | 21.57    | 29.59           | M+          | C <sub>38</sub> H <sub>36</sub> N <sub>4</sub> OPd |
| 670.1852 | 1 | 1545  | -11.94     | 100.00   | 100.00          | M+          | C <sub>38</sub> H <sub>36</sub> N <sub>4</sub> OPd |
| 672.2009 | 1 | 855   | 11.91      | 55.31    | 77.16           | M+          | C <sub>38</sub> H <sub>36</sub> N <sub>4</sub> OPd |
| 693.1928 | 1 | 2269  | 14.09      | 100.00   | 100.00          | (M+Na)+     | C <sub>38</sub> H <sub>36</sub> N <sub>4</sub> OPd |
| 697.1775 | 1 | 1114  | -9.54      | 49.11    | 37.41           | (M+Na)+     | C <sub>38</sub> H <sub>36</sub> N <sub>4</sub> OPd |
| 688.3322 |   | 42712 |            |          |                 |             |                                                    |

Figure S47. High Resolution Mass Spectrometry (HRMS) data of Intermediate D



**Table S1.** Crystal data and structure refinement for **2b**

|                                             |                                                                 |
|---------------------------------------------|-----------------------------------------------------------------|
| Identification code                         | <b>2b</b>                                                       |
| Empirical formula                           | C <sub>24</sub> H <sub>26</sub> N <sub>4</sub> PdI <sub>2</sub> |
| Formula weight                              | 730.69                                                          |
| Temperature/K                               | 145(2)                                                          |
| Crystal system                              | monoclinic                                                      |
| Space group                                 | P2 <sub>1</sub> /n                                              |
| a/Å                                         | 9.5780(3)                                                       |
| b/Å                                         | 16.2412(6)                                                      |
| c/Å                                         | 33.3733(12)                                                     |
| α/°                                         | 90                                                              |
| β/°                                         | 96.3530(10)                                                     |
| γ/°                                         | 90                                                              |
| Volume/Å <sup>3</sup>                       | 5159.6(3)                                                       |
| Z                                           | 8                                                               |
| ρ <sub>calc</sub> /g/cm <sup>3</sup>        | 1.881                                                           |
| μ/mm <sup>-1</sup>                          | 3.131                                                           |
| F(000)                                      | 2800.0                                                          |
| Crystal size/mm <sup>3</sup>                | 0.2 × 0.17 × 0.14                                               |
| Radiation                                   | MoKα (λ = 0.71073)                                              |
| 2θ range for data collection/°              | 4.456 to 51.448                                                 |
| Index ranges                                | -11 ≤ h ≤ 10, -19 ≤ k ≤ 19, -40 ≤ l ≤ 40                        |
| Reflections collected                       | 52632                                                           |
| Independent reflections                     | 9808 [R <sub>int</sub> = 0.0509, R <sub>sigma</sub> = 0.0365]   |
| Data/restraints/parameters                  | 9808/0/567                                                      |
| Goodness-of-fit on F <sup>2</sup>           | 1.206                                                           |
| Final R indexes [I ≥ 2σ (I)]                | R <sub>1</sub> = 0.0430, wR <sub>2</sub> = 0.0883               |
| Final R indexes [all data]                  | R <sub>1</sub> = 0.0498, wR <sub>2</sub> = 0.0906               |
| Largest diff. peak/hole / e Å <sup>-3</sup> | 1.57/-0.87                                                      |

**Table S2.** Bond lengths for **2b**

| Atom | Atom | Length/Å | Atom | Atom | Length/Å  |
|------|------|----------|------|------|-----------|
| C1   | C2   | 1.383(8) | C27  | C28  | 1.383(8)  |
| C1   | N4   | 1.379(7) | C27  | C32  | 1.397(8)  |
| C1   | Pd1  | 1.970(5) | C28  | C29  | 1.391(9)  |
| C2   | C3   | 1.466(8) | C29  | C30  | 1.374(9)  |
| C2   | N2   | 1.358(7) | C30  | C31  | 1.382(9)  |
| C3   | C4   | 1.401(8) | C31  | C32  | 1.379(9)  |
| C3   | C8   | 1.390(9) | C33  | C34  | 1.497(10) |
| C4   | C5   | 1.386(9) | C33  | N6   | 1.478(8)  |
| C5   | C6   | 1.382(9) | C35  | C36  | 1.398(9)  |
| C6   | C7   | 1.388(9) | C35  | C40  | 1.384(9)  |
| C7   | C8   | 1.377(9) | C35  | N8   | 1.451(8)  |

|     |     |           |     |     |           |
|-----|-----|-----------|-----|-----|-----------|
| C9  | C10 | 1.506(12) | C36 | C37 | 1.387(10) |
| C9  | N2  | 1.478(8)  | C36 | C41 | 1.516(10) |
| C11 | C12 | 1.397(8)  | C37 | C38 | 1.410(11) |
| C11 | C16 | 1.389(9)  | C38 | C39 | 1.378(10) |
| C11 | N4  | 1.452(8)  | C38 | C42 | 1.523(10) |
| C12 | C13 | 1.382(9)  | C39 | C40 | 1.387(9)  |
| C12 | C17 | 1.495(9)  | C40 | C43 | 1.510(9)  |
| C13 | C14 | 1.401(10) | C44 | C45 | 1.390(9)  |
| C14 | C15 | 1.373(10) | C44 | N5  | 1.321(8)  |
| C14 | C18 | 1.505(9)  | C45 | C46 | 1.361(10) |
| C15 | C16 | 1.404(9)  | C46 | C47 | 1.382(10) |
| C16 | C19 | 1.499(9)  | C47 | C48 | 1.376(9)  |
| C20 | C21 | 1.375(9)  | C48 | N5  | 1.347(8)  |
| C20 | N1  | 1.331(8)  | N1  | Pd1 | 2.116(5)  |
| C21 | C22 | 1.397(10) | N2  | N3  | 1.322(7)  |
| C22 | C23 | 1.374(10) | N3  | N4  | 1.328(7)  |
| C23 | C24 | 1.378(9)  | N5  | Pd2 | 2.107(5)  |
| C24 | N1  | 1.338(8)  | N6  | N7  | 1.319(7)  |
| C25 | C26 | 1.394(8)  | N7  | N8  | 1.331(7)  |
| C25 | N8  | 1.382(7)  | Pd1 | I1  | 2.6208(6) |
| C25 | Pd2 | 1.980(6)  | Pd1 | I2  | 2.5973(6) |
| C26 | C27 | 1.477(8)  | Pd2 | I3  | 2.5801(6) |
| C26 | N6  | 1.359(7)  | Pd2 | I4  | 2.6281(6) |

**Table S3. Bond angles for 2b**

| Atom | Atom | Atom | Angle/°  | Atom | Atom | Atom | Angle/°   |
|------|------|------|----------|------|------|------|-----------|
| C2   | C1   | Pd1  | 126.1(4) | C40  | C35  | C36  | 123.1(6)  |
| N4   | C1   | C2   | 103.2(5) | C40  | C35  | N8   | 120.0(5)  |
| N4   | C1   | Pd1  | 130.7(4) | C35  | C36  | C41  | 123.0(6)  |
| C1   | C2   | C3   | 128.7(5) | C37  | C36  | C35  | 117.3(6)  |
| N2   | C2   | C1   | 106.1(5) | C37  | C36  | C41  | 119.7(6)  |
| N2   | C2   | C3   | 125.2(5) | C36  | C37  | C38  | 121.5(6)  |
| C4   | C3   | C2   | 119.2(5) | C37  | C38  | C42  | 120.2(7)  |
| C8   | C3   | C2   | 121.7(5) | C39  | C38  | C37  | 118.0(6)  |
| C8   | C3   | C4   | 119.0(6) | C39  | C38  | C42  | 121.7(7)  |
| C5   | C4   | C3   | 119.6(6) | C38  | C39  | C40  | 122.7(7)  |
| C6   | C5   | C4   | 120.9(6) | C35  | C40  | C39  | 117.1(6)  |
| C5   | C6   | C7   | 119.6(6) | C35  | C40  | C43  | 122.7(6)  |
| C8   | C7   | C6   | 120.0(6) | C39  | C40  | C43  | 120.1(6)  |
| C7   | C8   | C3   | 121.0(6) | N5   | C44  | C45  | 123.0(6)  |
| N2   | C9   | C10  | 112.1(6) | C46  | C45  | C44  | 119.1(7)  |
| C12  | C11  | N4   | 118.7(5) | C45  | C46  | C47  | 118.8(6)  |
| C16  | C11  | C12  | 123.2(6) | C48  | C47  | C46  | 118.7(6)  |
| C16  | C11  | N4   | 118.1(5) | N5   | C48  | C47  | 122.9(6)  |
| C11  | C12  | C17  | 121.2(6) | C20  | N1   | C24  | 118.5(5)  |
| C13  | C12  | C11  | 117.1(6) | C20  | N1   | Pd1  | 122.1(4)  |
| C13  | C12  | C17  | 121.7(6) | C24  | N1   | Pd1  | 119.4(4)  |
| C12  | C13  | C14  | 122.2(6) | C2   | N2   | C9   | 128.6(5)  |
| C13  | C14  | C18  | 120.3(7) | N3   | N2   | C2   | 113.5(5)  |
| C15  | C14  | C13  | 118.2(6) | N3   | N2   | C9   | 117.9(5)  |
| C15  | C14  | C18  | 121.5(7) | N2   | N3   | N4   | 103.1(4)  |
| C14  | C15  | C16  | 122.5(6) | C1   | N4   | C11  | 128.5(5)  |
| C11  | C16  | C15  | 116.6(6) | N3   | N4   | C1   | 114.1(5)  |
| C11  | C16  | C19  | 122.7(6) | N3   | N4   | C11  | 117.4(5)  |
| C15  | C16  | C19  | 120.7(6) | C44  | N5   | C48  | 117.4(5)  |
| N1   | C20  | C21  | 123.2(6) | C44  | N5   | Pd2  | 126.2(4)  |
| C20  | C21  | C22  | 118.3(6) | C48  | N5   | Pd2  | 116.4(4)  |
| C23  | C22  | C21  | 118.4(6) | C26  | N6   | C33  | 128.9(5)  |
| C22  | C23  | C24  | 119.7(7) | N7   | N6   | C26  | 113.2(5)  |
| N1   | C24  | C23  | 122.0(6) | N7   | N6   | C33  | 117.4(5)  |
| C26  | C25  | Pd2  | 126.8(4) | N6   | N7   | N8   | 103.8(5)  |
| N8   | C25  | C26  | 102.9(5) | C25  | N8   | C35  | 129.2(5)  |
| N8   | C25  | Pd2  | 130.2(4) | N7   | N8   | C25  | 113.8(5)  |
| C25  | C26  | C27  | 130.5(5) | N7   | N8   | C35  | 116.4(5)  |
| N6   | C26  | C25  | 106.3(5) | C1   | Pd1  | N1   | 176.0(2)  |
| N6   | C26  | C27  | 122.9(5) | C1   | Pd1  | I1   | 87.90(17) |
| C28  | C27  | C26  | 121.9(5) | C1   | Pd1  | I2   | 88.99(17) |
| C28  | C27  | C32  | 118.5(6) | N1   | Pd1  | I1   | 92.12(14) |
| C32  | C27  | C26  | 119.5(5) | N1   | Pd1  | I2   | 90.49(14) |
| C27  | C28  | C29  | 120.6(6) | I2   | Pd1  | I1   | 172.31(2) |
| C30  | C29  | C28  | 120.2(6) | C25  | Pd2  | N5   | 172.8(2)  |
| C29  | C30  | C31  | 119.6(6) | C25  | Pd2  | I3   | 89.24(16) |
| C32  | C31  | C30  | 120.5(6) | C25  | Pd2  | I4   | 90.91(16) |
| C31  | C32  | C27  | 120.4(6) | N5   | Pd2  | I3   | 90.93(14) |
| N6   | C33  | C34  | 110.7(6) | N5   | Pd2  | I4   | 88.96(14) |
| C36  | C35  | N8   | 116.7(6) | I3   | Pd2  | I4   | 179.62(3) |
